# Supplementary material for: Modifying the phenyl group of PUGNAc: reactivity tuning to deliver selective inhibitors for N-acetyl-d-glucosaminidases
Source: Royal Society of Chemistry journal article supplement (doi:10.1039/c6ob00297h), 2016-01-01
Supplement: c6ob00297h1.pdf [file c6ob00297h1.pdf]

*Supplementary Information*

**Modifying the phenyl group of PUGNAc: Reactivity tuning  
to deliver selective inhibitors for *N*-acetyl-D-  
glucosaminidases**

Mitchell Hattie,<sup>a</sup> Nevena Cekic,<sup>b</sup> Aleksandra W. Debowski,<sup>a,c</sup> David J. Vocadlo<sup>b,d</sup> and  
Keith A. Stubbs<sup>a\*</sup>

*<sup>a</sup>School of Chemistry and Biochemistry, The University of Western Australia, Crawley,  
WA, 6009, Australia.*

*E-mail: keith.stubbs@uwa.edu.au*

*<sup>b</sup>Department of Chemistry, Simon Fraser University, Burnaby, British Columbia, V5A  
1S6, Canada*

*<sup>c</sup>School of Pathology and Laboratory Medicine, The University of Western Australia,  
Crawley, WA 6009, Australia*

*<sup>d</sup>Department of Molecular Biology and Biochemistry, Simon Fraser University,  
Burnaby, British Columbia, V5A 1S6, Canada*

## Experimental

### General

$^1\text{H}$  and  $^{13}\text{C}$  nuclear magnetic resonance (NMR) spectra were obtained on Bruker ARX500 (500 MHz for  $^1\text{H}$  and 126 MHz for  $^{13}\text{C}$ ) or Bruker AV600 or AV600III HD (600 MHz for  $^1\text{H}$  and 151 MHz for  $^{13}\text{C}$ ) spectrometers. Solvents used for NMR were: deuteriochloroform ( $\text{CDCl}_3$ ) with  $\text{CHCl}_3$  ( $^1\text{H}$ ,  $\delta$ , 7.26  $\text{CDCl}_3$  ( $^{13}\text{C}$ ,  $\delta$  77.16) used as an internal standard, tetradeuteriomethanol ( $\text{CD}_3\text{OD}$ ) with  $\text{CD}_2\text{HOD}$  ( $^1\text{H}$ ,  $\delta$  3.31) or  $\text{CD}_3\text{OD}$  ( $^{13}\text{C}$ ,  $\delta$  49.00) used as an internal standard, hexadeuteriodimethyl sulfoxide ( $d_6$ -DMSO) with  $\text{CD}_3\text{S(O)CD}_2\text{H}$  ( $^1\text{H}$ ,  $\delta$  2.50) or  $(\text{CD}_3)_2\text{SO}$  ( $^{13}\text{C}$ ,  $\delta$  39.52) used as an internal standard, deuterium oxide ( $\text{D}_2\text{O}$ ) with  $\text{DHO}$  ( $^1\text{H}$ ,  $\delta$  4.79) or  $\text{CH}_3\text{OH}$  ( $^{13}\text{C}$ ,  $\delta$  49.50) used as an internal standard.<sup>1</sup> All compounds were dried under vacuum to constant weight before analysis. High resolution mass spectra (HR-MS) were recorded with a Waters LCT Premier XE spectrometer, run in W-mode, using ESI or APCI ionisation methods as indicated, with MeCN:water (9:1) as a matrix. Flash chromatography was performed on BDH silica gel with the specified solvents. Thin layer chromatography (TLC) was performed on Merck silica gel 60 F254 aluminium-backed plates that were stained by heating ( $>200\text{ }^\circ\text{C}$ ) with 5% solution of sulfuric acid in EtOH.

*O*-(2-Acetamido-3,4,6-tri-*O*-acetyl-2-deoxy-D-glucopyranosylidene)amino *O'*-(4-nitrophenyl)carbonate **1**

*N,N*-Diisopropylethylamine (37  $\mu\text{L}$ , 0.21 mmol) and 4-nitrophenylchloroformate (0.21 mmol) were added to a stirred solution of hydroximolactone **2**<sup>2</sup> (70 mg, 0.19 mmol) in THF (3.5 mL) at  $0^\circ\text{C}$ . After 1.5 h., the reaction mixture was concentrated. Flash chromatography (EtOAc:hexane 7:3) of the residue afforded the carbonate **1** as a colourless oil (43 mg, 36%).  $^1\text{H}$  NMR (600 MHz,  $\text{CDCl}_3$ ):  $\delta$  8.27 (AA'BB', 2H), 7.41 (AA'BB', 2H), 7.07 (d,  $J = 8.0$  Hz, 1H), 5.43 (dd,  $J = 9.2, 9.2$  Hz, 1H), 5.32 (dd,  $J = 8.8, 8.8$  Hz, 1H), 4.80 (dd,  $J = 8.2, 9.2$  Hz, 1H), 4.59 (ddd,  $J = 2.5, 3.5, 8.6$  Hz, 1H), 4.46 (dd,  $J = 3.5, 13.0$  Hz, 1H), 4.31 (dd,  $J = 2.5, 13.0$  Hz, 1H), 2.12 (s, 3H), 2.05 (s, 3H), 2.00 (s, 3H), 1.99 (s, 3H).  $^{13}\text{C}$  NMR (151 MHz,  $\text{CDCl}_3$ ):  $\delta$  171.1, 170.3, 170.0, 169.2, 158.8, 155.0, 151.1, 145.6, 125.4, 121.6, 77.6, 71.3, 67.0, 61.2, 49.8, 22.6, 20.6, 20.44, 20.4. HR-MS (APCI)  $m/z$  548.1138;  $[\text{M}+\text{Na}]^+$  requires 548.1129.

*O*-(2-Acetamido-3,4,6-tri-*O*-acetyl-2-deoxy-D-glucopyranosylidene)amino *N*-phenyl carbamate **3**

*Method 1:* Aniline (21  $\mu$ L, 0.23 mmol) was added to a stirred solution of DIPEA (13  $\mu$ L, 0.080 mmol) and the 4-nitrophenylcarbonate **1** (40 mg, 0.076 mmol) in THF (2.0 mL) at 0°C. After 24 h., the reaction mixture was concentrated and the residue dissolved in CH<sub>2</sub>Cl<sub>2</sub>, washed with water (15 mL), brine (15 mL), dried (MgSO<sub>4</sub>), filtered and concentrated. Flash chromatography (EtOAc:hexane 7:3) of the residue yielded the triacetate **3** as a colourless oil (30 mg, 50%). The <sup>1</sup>H and <sup>13</sup>C NMR spectra was consistent with that found in the literature.<sup>2</sup>

*Method 2:* *N,N*-Diisopropylethylamine (37  $\mu$ L, 0.21 mmol) and 4-nitrophenylchloroformate (43 mg, 0.21 mmol) were added to a stirred solution of hydroximolactone **2**<sup>2</sup> (70 mg, 0.19 mmol) in THF (3.5 mL) at 0°C. After 1.5 h., aniline (0.21 mmol) and DIPEA (37  $\mu$ L, 0.21 mmol) were added at 0°C and the reaction mixture was concentrated once all the *in situ* carbonate **1** was consumed, as judged by TLC. Flash chromatography of the resultant residue (EtOAc:hexane 7:3) yielded the triacetate **3** as a colourless oil (56 mg, 69%).

*General preparation of 3,4,6-tri-O-acetyl carbamates 4-33, using the in situ method.*

#### *Procedure 1*

*N,N*-Diisopropylethylamine (1.1 equiv) and 4-nitrophenylchloroformate (1.1 equiv) were added to a stirred solution of **2**<sup>2</sup> (1.0 equiv) in THF (20 mL/mmol) at 0°C. After 1.5 h., the appropriate amine (1.1 equiv) and DIPEA (1.5 equiv) were added at 0°C and the reaction mixture was concentrated once all the *in situ* carbonate **1** was consumed, as judged by TLC.

#### *Procedure 2*

*N,N*-Diisopropylethylamine (1.1 equiv) and 4-nitrophenylchloroformate (1.1 equiv) were added to a stirred solution of **2**<sup>2</sup> (1.0 equiv) in THF (20 mL/mmol) at 0°C. After 1.5 h., the appropriate amine hydrochloride (1.1 equiv) and DIPEA (2.5 equiv) were added at 0°C and the reaction mixture was concentrated once all the *in situ* carbonate **1** was consumed, as judged by TLC.

*O*-(2-Acetamido-3,4,6-tri-*O*-acetyl-2-deoxy-D-glucopyranosylidene)amino *N*-(4-methylphenyl) carbamate **4**

Using **2** and 4-methylaniline according to Procedure 1 and flash chromatography (EtOAc:hexane 3:1) yielded the triacetate **4** as a colourless oil (60 mg, 64%).  $R_f$  0.32 (EtOAc:hexane 7:3).  $^1\text{H}$  NMR (500 MHz,  $\text{CDCl}_3$ ):  $\delta$  7.51 (*br s*, 1H), 7.29 (AA'BB', 2H), 7.13 (AA'BB', 2H), 6.41 (d,  $J = 8.0$  Hz, 1H), 5.36-5.32 (m, 2H), 4.96 (dd,  $J = 8.5, 9.0$  Hz, 1H), 4.47-4.41 (m, 2H), 4.33 (dd,  $J = 2.0, 12.5$  Hz, 1H), 2.31 (s, 3H), 2.14 (s, 3H), 2.08 (s, 6H), 2.04 (s, 3H).  $^{13}\text{C}$  NMR (126 MHz,  $\text{CDCl}_3$ ):  $\delta$  170.5, 170.4, 170.3, 169.1, 154.8, 151.7, 134.2, 134.0, 129.9, 119.4, 77.4, 71.3, 67.2, 61.3, 49.5, 23.0, 20.8, 20.7, 20.6, 20.5. HR-MS (APCI)  $m/z$  494.1775;  $[\text{M}+\text{H}]^+$  requires 494.1775.

*O*-(2-Acetamido-3,4,6-tri-*O*-acetyl-2-deoxy-D-glucopyranosylidene)amino *N*-(4-methoxyphenyl) carbamate **5**

Using **2** and 4-anisidine according to Procedure 1 and flash chromatography (EtOAc:hexane 4:1) yielded the triacetate **5** as a colourless oil (60 mg, 95%).  $R_f$  0.30 (EtOAc:hexane, 4:1).  $^1\text{H}$  NMR (500 MHz,  $\text{CDCl}_3$ ):  $\delta$  7.47 (*br s*, 1H), 7.32 (AA'BB', 2H), 6.87 (AA'BB', 2H), 6.44 (d,  $J = 8.5$  Hz, 1H), 5.37-5.31 (m, 2H), 4.97 (dd,  $J = 8.5, 8.5$  Hz, 1H), 4.46-4.32 (m, 3H), 3.79 (s, 3H), 2.14 (s, 3H), 2.08 (s, 6H), 2.03 (s, 3H).  $^{13}\text{C}$  NMR (126 MHz,  $\text{CDCl}_3$ ):  $\delta$  170.5, 170.4, 170.3, 169.1, 156.6, 154.7, 152.1, 129.7, 121.4, 114.4, 77.4, 71.3, 67.2, 61.3, 55.5, 49.5, 23.0, 20.7, 20.6, 20.5. HR-MS (APCI)  $m/z$  532.1525;  $[\text{M}+\text{Na}]^+$  requires 532.1543.

*O*-(2-Acetamido-3,4,6-tri-*O*-acetyl-2-deoxy-D-glucopyranosylidene)amino *N*-(4-bromophenyl)carbamate **6**

Using **2** and 4-bromoaniline according to Procedure 1 and flash chromatography (EtOAc:hexane 7:3) yielded the triacetate **6** as a colourless oil (20 mg, 23%).  $R_f$  0.27 (EtOAc:hexane 7:3).  $^1\text{H}$  NMR (500 MHz,  $\text{CDCl}_3$ ):  $\delta$  7.76 (*br s*, 1H), 7.42 (AA'BB', 2H), 7.33 (AA'BB', 2H), 6.87 (d,  $J = 7.5$  Hz, 1H), 5.39 (dd,  $J = 8.5, 8.5$  Hz, 1H), 5.33 (dd,  $J = 9.0, 9.0$  Hz, 1H), 4.84 (dd,  $J = 8.5, 8.5$  Hz, 1H), 4.51 (ddd,  $J = 2.5, 3.0, 8.5$  Hz, 1H), 4.41 (dd,  $J = 3.5, 13.0$  Hz, 1H), 4.31 (dd,  $J = 2.5, 13.0$  Hz, 1H), 2.11 (s, 3H), 2.06 (s, 3H), 2.04 (s, 3H), 2.02 (s, 3H).  $^{13}\text{C}$  NMR (126 MHz,  $\text{CDCl}_3$ ):  $\delta$  170.6, 170.4, 170.2, 169.1, 155.6, 154.7, 151.2, 136.1, 132.1, 120.1, 116.8, 77.2, 71.3, 67.1, 61.2,

49.7, 22.9, 20.62, 20.6, 20.5. HR-MS (APCI)  $m/z$  558.0717;  $[M+H]^+$  requires 558.0723.

*O*-(2-Acetamido-3,4,6-tri-*O*-acetyl-2-deoxy-*D*-glucopyranosylidene)amino *N*-benzyl carbamate **7**

Using **2** and  $\text{BnNH}_2$  according to Procedure 1 and flash chromatography (EtOAc:hexane 9:1) yielded the triacetate **7** as a colourless oil (54 mg, 55%).  $R_f$  0.35 (EtOAc:hexane 9:1).  $^1\text{H}$  NMR (500 MHz,  $\text{CDCl}_3$ ):  $\delta$  7.36-7.27 (m, 5H), 6.14 (d,  $J = 9.0$  Hz, 1H), 5.97 (t,  $J = 5.0$  Hz, 1H), 5.34 (dd,  $J = 8.5, 8.5$  Hz, 1H), 5.26 (dd,  $J = 10.0, 10.0$  Hz, 1H), 4.97 (dd,  $J = 8.5, 10.0$  Hz, 1H), 4.49-4.37 (m, 3H), 4.29 (dd,  $J = 1.5, 12.5$  Hz, 1H), 2.13 (s, 3H), 2.07 (s, 3H), 2.06 (s, 3H), 1.95 (s, 3H).  $^{13}\text{C}$  NMR (126 MHz,  $\text{CDCl}_3$ ):  $\delta$  170.5, 170.4, 170.1, 169.1, 154.6, 154.1, 137.7, 128.8, 127.8, 127.6, 77.5, 71.4, 67.3, 61.4, 49.4, 45.3, 22.9, 20.64, 20.6, 20.5. HR-MS (APCI)  $m/z$  516.1590;  $[M+\text{Na}]^+$  requires 516.1594.

*O*-(2-Acetamido-3,4,6-tri-*O*-acetyl-2-deoxy-*D*-glucopyranosylidene)amino *N*-cyclopropylcarbamate **8**

Using **2** and cyclopropylamine according to Procedure 1 and flash chromatography (EtOAc:hexane 3:1) yielded the triacetate **8** as a colourless oil (68 mg, 89%).  $R_f$  0.28 (EtOAc:hexane 3:1).  $^1\text{H}$  NMR (500 MHz,  $\text{CDCl}_3$ ):  $\delta$  6.52 (d,  $J = 6.0$  Hz, 1H), 5.49 (s, 1H), 5.34-5.27 (m, 2H), 5.28 (dd,  $J = 8.5, 8.5$  Hz, 1H), 4.94 (dd,  $J = 9.0, 9.0$  Hz, 1H), 4.45-4.39 (m, 2H), 4.29 (dd,  $J = 3.0, 13.0$  Hz, 1H), 2.67-2.61 (m, 1H), 2.12 (s, 3H), 2.07 (s, 3H), 2.06 (s, 3H), 2.03 (s, 3H), 0.79-0.73 (m, 2H), 0.58-0.54 (m, 2H).  $^{13}\text{C}$  NMR (126 MHz,  $\text{CDCl}_3$ ):  $\delta$  170.4, 170.3, 169.1, 155.5, 154.3, 71.5, 67.3, 61.4, 49.3, 22.9, 22.6, 20.63, 20.6, 20.5, 6.8. HR-MS (APCI)  $m/z$  444.1603;  $[M+H]^+$  requires 444.1618.

*O*-(2-Acetamido-3,4,6-tri-*O*-acetyl-2-deoxy-*D*-glucopyranosylidene)amino *N*-cyclobutylcarbamate **9**

Using **2** and cyclobutylamine according to Procedure 1 and flash chromatography (EtOAc:hexane 9:1) yielded the triacetate **9** as a colourless oil (72 mg, 53%).  $R_f$  0.29 (EtOAc:hexane 9:1).  $^1\text{H}$  NMR (500 MHz,  $\text{CDCl}_3$ ):  $\delta$  6.40 (d,  $J = 8.5$  Hz, 1H), 5.78 (d,  $J = 7.5$  Hz, 1H), 5.33 (dd,  $J = 8.5, 8.5$  Hz, 1H), 5.28 (dd,  $J = 8.5, 8.5$  Hz, 1H), 4.96

(dd,  $J = 8.5, 8.5$  Hz, 1H), 4.43-4.40 (m, 2H), 4.30 (dd,  $J = 3.5, 13.5$  Hz, 1H), 4.22-4.19 (m, H), 2.37-2.32 (m 2H), 2.13 (s, 3H), 2.07 (s, 3H), 2.06 (s, 3H), 2.04, (s, 3H), 1.94-1.95 (m, 2H), 1.76-1.68 (m, 2H).  $^{13}\text{C}$  NMR (126 MHz,  $\text{CDCl}_3$ ):  $\delta$  170.4, 170.3, 169.1, 154.0, 153.5, 71.5, 67.3, 61.3, 49.4, 46.3, 31.0, 23.0, 20.64, 20.6, 20.5, 14.9. HR-MS (APCI)  $m/z$  458.1765;  $[\text{M}+\text{H}]^+$  requires 458.1775.

*O*-(2-Acetamido-3,4,6-tri-*O*-acetyl-2-deoxy-D-glucopyranosylidene)amino *N*-cyclopentylcarbamate **10**

Using **2** and cyclopentylamine according to Procedure 1 and flash chromatography (EtOAc:hexane 9:1) yielded the triacetate **10** as a colourless oil (70 mg, 79%).  $R_f$  0.33 (EtOAc:hexane 9:1).  $^1\text{H}$  NMR (500 MHz,  $\text{CDCl}_3$ ):  $\delta$  6.30 (d,  $J = 7.5$  Hz, 1H), 5.60 (d,  $J = 7.5$  Hz, 1H), 5.34 (dd,  $J = 8.5, 8.5$  Hz, 1H), 5.27 (dd,  $J = 9.0, 9.0$  Hz, 1H), 4.96 (dd,  $J = 9.0, 9.0$  Hz, 1H), 4.43-4.37 (m, 2H), 4.30 (dd,  $J = 2.5, 12.5$  Hz, 1H), 4.05-4.01 (m, 1H), 2.13 (s, 3H), 2.07 (s, 3H), 2.06 (s, 3H), 2.03, (s, 3H), 1.99-1.95 (m, 2H), 1.70-1.58 (m, 4H), 1.47-1.42 (m, 2H).  $^{13}\text{C}$  NMR (126 MHz,  $\text{CDCl}_3$ ):  $\delta$  170.4, 170.3, 169.0, 154.1, 153.7, 71.4, 67.3, 61.4, 53.0, 49.4, 33.1, 33.0, 23.5, 23.0, 20.64, 20.6, 20.5. HR-MS (APCI)  $m/z$  472.1915;  $[\text{M}+\text{H}]^+$  requires 472.1931.

*O*-(2-Acetamido-3,4,6-tri-*O*-acetyl-2-deoxy-D-glucopyranosylidene)amino *N*-cyclohexylcarbamate **11**

Using **2** and cyclohexylamine according to Procedure 1 and flash chromatography (EtOAc:hexane 3:1) yielded the triacetate **11** as a colourless oil (67 mg, 76%).  $R_f$  0.25 (EtOAc:hexane 7:3).  $^1\text{H}$  NMR (500 MHz,  $\text{CDCl}_3$ ):  $\delta$  6.18 (d,  $J = 8.5$  Hz, 1H), 5.54 (d,  $J = 8.0$  Hz, 1H), 5.35 (dd,  $J = 8.5, 8.5$  Hz, 1H), 5.25 (dd,  $J = 10.0, 10.0$  Hz, 1H), 5.00 (dd,  $J = 9.0, 9.0$  Hz, 1H), 4.41 (dd,  $J = 3.5, 12.5$  Hz, 1H), 4.35 (ddd,  $J = 2.5, 3.5, 12.5$  Hz, 1H), 4.30 (dd,  $J = 2.5, 12.5$  Hz, 1H), 3.58-3.56 (m, 1H), 2.14 (s, 3H), 2.08 (*br s*, 2H), 2.07 (s, 3H), 2.03, (s, 3H), 1.97-1.94 (m, 2H), 1.72-1.68 (m, 2H), 1.41-1.31 (m, 3H), 1.22-1.15 (m, 3H).  $^{13}\text{C}$  NMR (126 MHz,  $\text{CDCl}_3$ ):  $\delta$  170.44, 170.4, 170.1, 169.1, 153.6, 153.4, 71.4, 67.3, 61.4, 50.1, 49.5, 33.0, 25.4, 24.6, 23.0, 20.7, 20.6, 20.5. HR-MS (APCI)  $m/z$  486.2081;  $[\text{M}+\text{H}]^+$  requires 486.2088.

*O*-(2-Acetamido-3,4,6-tri-*O*-acetyl-2-deoxy-D-glucopyranosylidene)amino *N*-  
(adamant-1-yl)carbamate **12**

Using **2** and adamant-1-ylamine according to Procedure 1 and flash chromatography (EtOAc:hexane 3:1) yielded the triacetate **12** as a colourless oil (99 mg, 86%).  $R_f$  0.29 (EtOAc:hexane 3:1).  $^1\text{H NMR}$  (500 MHz,  $\text{CDCl}_3$ ):  $\delta$  6.22 (d,  $J = 7.0$  Hz, 1H), 5.44 (*br s*, 1H), 5.36 (dd,  $J = 9.0, 9.0$  Hz, 1H), 5.25 (dd,  $J = 10.0, 10.0$  Hz, 1H), 5.00 (dd,  $J = 9.0, 10.0$  Hz, 1H), 4.40 (dd,  $J = 3.0, 12.0$  Hz, 1H), 4.35-4.29 (m, 2H), 2.14 (s, 3H), 2.09 (*br s*, 2H), 2.07 (s, 3H), 2.06 (s, 3H), 2.03 (s, 3H), 1.96 (*br s*, 6H), 1.68 (*br s*, 6H).  $^{13}\text{C NMR}$  (126 MHz,  $\text{CDCl}_3$ ):  $\delta$  170.43, 170.4, 170.3, 169.1, 153.2, 152.0, 77.4, 71.5, 67.3, 61.4, 51.4, 49.4, 41.5, 36.2, 29.4, 23.0, 20.7, 20.6, 20.5. HR-MS (APCI)  $m/z$  538.2423;  $[\text{M}+\text{H}]^+$  requires 538.2401.

*O*-(2-Acetamido-3,4,6-tri-*O*-acetyl-2-deoxy-D-glucopyranosylidene)amino *N*-(2-  
amino-2-oxoeth-1-yl)carbamate **13**

Using **2** and glycynamide<sup>3</sup> according to Procedure 1 and flash chromatography (MeOH:EtOAc 1:9) yielded the triacetate **13** as a colourless oil (43 mg, 61%).  $R_f$  0.15 (EtOAc:hexane:MeOH 75:23:2).  $^1\text{H NMR}$  (600 MHz,  $\text{CDCl}_3$ ):  $\delta$  7.17 (d,  $J = 8.4$  Hz, 1H), 7.15 (dd,  $J = 5.4, 6.0$  Hz, 1H), 6.62 (*br s*, 1H), 6.17 (*br s*, 1H), 5.38 (dd,  $J = 9.0, 9.0$  Hz, 1H), 5.34 (dd,  $J = 9.0, 9.0$  Hz, 1H), 4.98 (dd,  $J = 9.0, 9.0$  Hz, 1H), 4.58-4.55 (m, 1H), 4.41 (dd,  $J = 2.4, 12.6$  Hz, 1H), 4.31 (dd,  $J = 1.8, 12.6$  Hz, 1H), 3.96 (dd,  $J = 6.0, 16.2$  Hz, 1H), 3.82 (dd,  $J = 5.4, 16.2$  Hz, 1H), 2.12 (s, 3H), 2.06 (s, 3H), 2.05 (s, 3H), 2.02 (s, 3H).  $^{13}\text{C NMR}$  (151 MHz,  $\text{CDCl}_3$ ):  $\delta$  171.9, 171.1, 170.6, 170.4, 169.2, 155.8, 154.8, 71.4, 67.2, 61.2, 49.2, 43.9, 22.8, 20.6, 20.5. HR-MS (APCI)  $m/z$  461.1514;  $[\text{M}+\text{H}]^+$  requires 461.1520.

*O*-(2-Acetamido-3,4,6-tri-*O*-acetyl-2-deoxy-D-glucopyranosylidene)amino (*S*)-*N*-(1-  
amino-1-oxoprop-2-yl)carbamate **14**

Using **2** and (*S*)-alaninamide<sup>4</sup> according to Procedure 1 and flash chromatography (MeOH:EtOAc 3:97) yielded the triacetate **14** as a colourless oil (90 mg, 89%).  $R_f$  0.40 (MeOH:EtOAc 1:19).  $^1\text{H NMR}$  (500 MHz,  $\text{CDCl}_3$ ):  $\delta$  7.00-6.98 (m, 2H), 6.12 (*br s*, 1H), 5.71 (*br s*, 1H), 5.39 (dd,  $J = 9.0, 9.0$  Hz, 1H), 5.33 (dd,  $J = 10.0, 10.0$  Hz, 1H), 5.01 (dd,  $J = 9.5, 9.5$  Hz, 1H), 4.67-4.64 (m, 1H), 4.40 (dd,  $J = 2.5, 13.0$  Hz, 1H), 4.30 (dd,  $J = 1.5, 13.0$  Hz, 1H), 4.22 (quintet,  $J = 6.5$  Hz, 1H), 2.12 (s, 3H), 2.07

(s, 3H), 2.06 (s, 3H), 2.05 (s, 3H), 1.47 (d,  $J = 6.5$  Hz, 3H).  $^{13}\text{C}$  NMR (126 MHz,  $\text{CDCl}_3$ ):  $\delta$  175.3, 170.7, 170.6, 170.5, 169.1, 155.2, 154.1, 71.7, 66.8, 61.0, 50.7, 49.4, 22.8, 20.7, 20.6, 20.5, 17.9. HR-MS (APCI)  $m/z$  475.1682;  $[\text{M}+\text{H}]^+$  requires 475.1676.

*O*-(2-Acetamido-3,4,6-tri-*O*-acetyl-2-deoxy-D-glucopyranosylidene)amino *N*-((*S*)-1-amino-3-hydroxy-1-oxo-prop-2-yl) carbamate **15**

Using **2** and (*S*)-2-amino-3-hydroxypropanamide<sup>5</sup> according to Procedure 1 and flash chromatography (MeOH/EtOAc 3:47) gave the triacetate **15** as a colourless oil (70 mg, 64%).  $R_f$  0.15 (MeOH/EtOAc 3:47).  $^1\text{H}$  NMR (500 MHz,  $\text{CD}_3\text{OD}$ )  $\delta$  5.44 (dd,  $J = 8.9, 8.9$  Hz, 1H), 5.34 (dd,  $J = 8.9, 8.9$  Hz, 1H), 4.87 (dd,  $J = 9.1, 9.1$  Hz, 1H), 4.60-4.56 (m, 3H), 4.45 (dd,  $J = 4.0, 12.9$  Hz, 1H), 4.41-4.28 (m, 2H), 4.25 (dd,  $J = 4.6, 4.6$  Hz, 1H), 3.85 (dd,  $J = 4.7, 11.2$  Hz, 1H), 3.80 (dd,  $J = 4.7, 11.2$  Hz, 1H), 2.10 (s, 3H), 2.06 (s, 3H), 2.04 (s, 3H), 2.01 (s, 3H).  $^{13}\text{C}$  NMR (126 MHz,  $\text{CD}_3\text{OD}$ )  $\delta$  174.6, 173.7, 172.1, 171.4, 171.0, 156.9, 156.4, 78.4, 72.5, 62.7, 57.8, 50.6, 22.6, 20.6, 20.5, 20.5. HR-MS (APCI)  $m/z$  491.1619;  $[\text{M}+\text{H}]^+$  requires 491.1625.

*O*-(2-Acetamido-3,4,6-tri-*O*-acetyl-2-deoxy-D-glucopyranosylidene)amino (*S*)-*N*-(1-amino-1-oxo-3-phenylprop-2-yl)carbamate **16**

Using **2** and (*S*)-phenylalaninamide<sup>6</sup> according to Procedure 1 and flash chromatography (MeOH:EtOAc 1:39) yielded the triacetate **16** as a colourless oil (83 mg, 78%).  $R_f$  0.17 (EtOAc:hexane:MeOH 75:23:2).  $^1\text{H}$  NMR (600 MHz,  $\text{CDCl}_3$ ):  $\delta$  7.31-7.24 (m, 6H), 7.02 (d,  $J = 8.4$  Hz, 1H), 5.95 (*br s*, 1H), 5.72 (*br s*, 1H), 5.38 (dd,  $J = 9.0, 9.0$  Hz, 1H), 5.28 (dd,  $J = 9.6, 9.6$  Hz, 1H), 5.01 (dd,  $J = 9.0, 9.0$  Hz, 1H), 4.68-4.66 (m, 1H), 4.39-4.34 (m, 2H), 4.29 (dd,  $J = 2.4, 12.0$  Hz, 1H), 3.20 (dd,  $J = 7.2, 14.8$  Hz, 1H), 3.10 (dd,  $J = 7.8, 13.8$  Hz, 1H), 2.11 (s, 3H), 2.03 (s, 3H), 2.02 (s, 6H).  $^{13}\text{C}$  NMR (151 MHz,  $\text{CDCl}_3$ ):  $\delta$  174.2, 170.7, 170.6, 170.4, 169.1, 155.4, 154.3, 72.0, 66.7, 60.8, 57.1, 49.2, 38.0, 22.8, 20.7, 20.6, 20.5. HR-MS (APCI)  $m/z$  551.1979;  $[\text{M}+\text{H}]^+$  requires 551.1989.

*O*-(2-Acetamido-3,4,6-tri-*O*-acetyl-2-deoxy-D-glucopyranosylidene)amino *N*-(2-hexylamino-2-oxoeth-1-yl) carbamate **17**

Using **2** and the hydrochloride<sup>7</sup> according to Procedure 2 and flash chromatography



(MeOH/EtOAc 1:19) gave the triacetate **17** as a white solid (85 mg, 70%).  $R_f$  0.35 (EtOAc).  $^1\text{H}$  NMR (600 MHz,  $\text{CDCl}_3$ )  $\delta$  7.10 (t,  $J = 5.7$  Hz, 1H), 6.91 (d,  $J = 8.5$  Hz, 1H), 6.21 (t,  $J = 5.6$ , Hz, 1H), 5.38 (dd,  $J = 9.0, 9.0$  Hz, 1H), 5.33 (dd,  $J = 8.6, 8.6$  Hz, 1H), 4.98 (dd,  $J = 8.9, 8.9$  Hz, 1H), 4.58 (ddd,  $J = 2.9, 2.9, 8.7$  Hz, 1H), 4.42 (dd,  $J = 3.3, 12.9$  Hz, 1H), 4.28 (dd,  $J = 2.5, 12.9$  Hz, 1H), 3.94 (dd,  $J = 5.9, 16.4$  Hz, 1H), 3.77 (dd,  $J = 5.2, 16.3$  Hz, 1H), 3.36-3.12 (m, 2H), 2.12 (s, 3H), 2.05 (s, 3H), 2.05 (s, 3H), 2.04 (s, 3H), 1.52-1.47 (m, 2H), 1.38-1.18 (m, 6H), 0.88 (app t,  $J = 6.8$  Hz, 3H).  $^{13}\text{C}$  NMR (151 MHz,  $\text{CDCl}_3$ )  $\delta$  170.9, 170.6, 170.3, 169.3, 169.01, 155.8, 154.7, 77.4, 71.6, 67.4, 61.3, 49.4, 44.6, 40.0, 31.6, 29.5, 26.7, 23.0, 22.7, 20.8, 20.7, 14.1. HR-MS (APCI)  $m/z$  545.2458;  $[\text{M}+\text{H}]^+$  requires 545.2459.

*O*-(2-Acetamido-3,4,6-tri-*O*-acetyl-2-deoxy-D-glucopyranosylidene)amino *N*-methyl carbamate **18**

Using **2** and methylamine hydrochloride according to Procedure 2 and flash chromatography (MeOH/EtOAc 3:97) gave the triacetate **18** as a white solid (40 mg, 57%). The  $^1\text{H}$  NMR spectrum was consistent with that found in the literature.<sup>8</sup>

*O*-(2-Acetamido-3,4,6-tri-*O*-acetyl-2-deoxy-D-glucopyranosylidene)amino *N*-ethyl carbamate **19**

Using **2** and ethylamine hydrochloride according to Procedure 2 and flash chromatography (EtOAc) gave the triacetate **19** as a colourless oil (59 mg, 83%).  $R_f$  0.32 (EtOAc).  $^1\text{H}$  NMR (500 MHz,  $\text{CDCl}_3$ )  $\delta$  6.54 (d,  $J = 8.5$  Hz, 1H), 5.69 (br s, 1H), 5.46-5.22 (m, 2H), 4.97 (dd,  $J = 8.9, 8.9$  Hz, 1H), 4.45-4.26 (m, 3H), 3.36 – 3.25 (m, 2H), 2.13 (s, 3H), 2.07 (s, 3H), 2.07 (s, 3H), 2.03 (s, 3H), 1.18 (app t,  $J = 7.2$  Hz, 3H).  $^{13}\text{C}$  NMR (126 MHz,  $\text{CDCl}_3$ )  $\delta$  170.5, 170.5, 169.3, 154.8, 154.2, 71.7, 67.5, 61.5, 49.4, 36.3, 23.1, 20.8, 20.8, 20.7, 15.1. HR-MS (APCI)  $m/z$  432.1621;  $[\text{M}+\text{H}]^+$  requires 432.1618.

*O*-(2-Acetamido-3,4,6-tri-*O*-acetyl-2-deoxy-D-glucopyranosylidene)amino *N*-(prop-1-yl)carbamate **20**

Using **2** and 1-propylamine according to Procedure 1 and flash chromatography (EtOAc:hexane 17:3) yielded the triacetate **20** as a colourless oil (64 mg, 71%).  $R_f$  0.26 (EtOAc:hexane 4:1).  $^1\text{H}$  NMR (500 MHz,  $\text{CDCl}_3$ ):  $\delta$  7.01 (d,  $J = 8.5$  Hz, 1H),

5.93 (t,  $J = 5.5$  Hz, 1H), 5.32 (dd,  $J = 8.0, 8.0$  Hz, 1H), 5.28 (dd,  $J = 8.5, 8.5$  Hz, 1H), 4.88 (dd,  $J = 8.5, 8.5$  Hz, 1H), 4.50 (ddd,  $J = 2.5, 3.5, 8.0$  Hz, 1H), 4.40 (dd,  $J = 3.5, 12.5$  Hz, 1H), 4.27 (dd,  $J = 2.5, 13.0$  Hz, 1H), 3.19-3.15 (m, 2H), 2.09 (s, 3H), 2.04 (s, 6H), 1.99 (s, 3H), 1.54 (heptet,  $J = 7.5$  Hz, 2H) 0.91 (t,  $J = 7.5$  Hz, 3H).  $^{13}\text{C}$  NMR (126 MHz,  $\text{CDCl}_3$ ):  $\delta$  170.4, 170.4, 170.0, 169.1, 155.1, 154.1, 76.7, 71.4, 67.3, 61.2, 49.3, 42.8, 22.8, 22.76, 20.5, 20.55, 20.5, 11.1. HR-MS (APCI)  $m/z$  446.1781;  $[\text{M}+\text{H}]^+$  requires 446.1775.

*O*-(2-Acetamido-3,4,6-tri-*O*-acetyl-2-deoxy-D-glucopyranosylidene)amino *N*-(but-1-yl)carbamate **21**

Using **2** and 1-butylamine according to Procedure 1 and flash chromatography (EtOAc:hexane 9:1) yielded the triacetate **21** as a colourless oil (67 mg, 71%).  $R_f$  0.28 (EtOAc:hexane 4:1).  $^1\text{H}$  NMR (500 MHz,  $\text{CDCl}_3$ ):  $\delta$  6.96 (d,  $J = 8.0$  Hz, 1H), 5.87 (t,  $J = 5.5$  Hz, 1H), 5.32 (dd,  $J = 8.5, 8.5$  Hz, 1H), 5.29 (dd,  $J = 8.0, 8.0$  Hz, 1H), 4.89 (dd,  $J = 8.5, 8.5$  Hz, 1H), 4.90 (ddd,  $J = 2.5, 3.5, 8.0$  Hz, 1H), 4.40 (dd,  $J = 3.5, 12.5$  Hz, 1H), 4.28 (dd,  $J = 2.5, 12.5$  Hz, 1H), 3.23-3.18 (m, 2H), 2.10 (s, 3H), 2.04 (s, 6H), 2.00 (s, 3H), 1.52-1.47 (m, 2H), 1.37-1.31 (m, 2H), 0.91 (t,  $J = 7.5$  Hz, 3H).  $^{13}\text{C}$  NMR (126 MHz,  $\text{CDCl}_3$ ):  $\delta$  170.41, 170.4, 170.0, 169.1, 155.0, 154.1, 71.4, 67.3, 61.2, 49.3, 40.9, 31.6, 22.8, 20.6, 20.56, 20.5, 19.8, 13.6. HR-MS (APCI)  $m/z$  460.1938;  $[\text{M}+\text{H}]^+$  requires 460.1931.

*O*-(2-Acetamido-3,4,6-tri-*O*-acetyl-2-deoxy-D-glucopyranosylidene)amino *N*-(hex-1-yl)carbamate **22**

Using **2** and 1-hexylamine according to Procedure 1 and flash chromatography (EtOAc:hexane 4:1) yielded the triacetate **22** as a colourless oil (69 mg, 69%).  $R_f$  0.33 (EtOAc:hexane 4:1).  $^1\text{H}$  NMR (600 MHz,  $\text{CDCl}_3$ ):  $\delta$  6.99 (d,  $J = 8.4$  Hz, 1H), 5.88 (t,  $J = 5.4$  Hz, 1H), 5.32 (dd,  $J = 8.4, 8.4$  Hz, 1H), 5.28 (dd,  $J = 7.8, 7.8$  Hz, 1H), 4.87 (dd,  $J = 7.8, 7.8$  Hz, 1H), 4.99 (ddd,  $J = 2.4, 3.0, 8.4$  Hz, 1H), 4.40 (dd,  $J = 3.0, 12.6$  Hz, 1H), 4.28 (dd,  $J = 2.4, 12.6$  Hz, 1H), 3.24-3.17 (m, 2H), 2.09 (s, 3H), 2.04 (s, 6H), 1.99 (s, 3H), 1.51-1.49 (m, 2H), 1.33-1.23 (m, 6H), 0.86 (t,  $J = 6.6$  Hz, 3H).  $^{13}\text{C}$  NMR (151 MHz,  $\text{CDCl}_3$ ):  $\delta$  170.4, 170.0, 169.1, 155.0, 154.1, 76.7, 71.4, 67.3, 61.2, 49.3, 41.2, 31.3, 29.5, 26.3, 22.8, 22.5, 20.6, 20.54, 20.5, 13.9. HR-MS (APCI)  $m/z$  488.2259;  $[\text{M}+\text{H}]^+$  requires 488.2244.

*O*-(2-Acetamido-3,4,6-tri-*O*-acetyl-2-deoxy-D-glucopyranosylidene)amino *N*-(prop-2-yl)carbamate **23**

Using **2** and 2-propylamine according to Procedure 1 and flash chromatography (EtOAc:hexane 4:1) yielded the triacetate **23** as a colourless oil (48 mg, 67%).  $R_f$  0.34 (EtOAc:hexane 4:1).  $^1\text{H NMR}$  (500 MHz,  $\text{CDCl}_3$ ):  $\delta$  6.23 (d,  $J = 8.0$  Hz, 1H), 5.47 (d,  $J = 7.0$  Hz, 1H), 5.34 (dd,  $J = 8.5, 8.5$  Hz, 1H), 5.27 (dd,  $J = 9.5, 9.5$  Hz, 1H), 4.97 (dd,  $J = 9.5, 9.5$  Hz, 1H), 4.43-4.37 (m, 2H), 4.30 (dd,  $J = 2.5, 12.5$  Hz, 1H), 3.92-3.84 (m, 1H), 2.13 (s, 3H), 2.08 (s, 3H), 2.07 (s, 3H), 2.03 (s, 3H), 1.20 (t,  $J = 6.5$  Hz, 6H).  $^{13}\text{C NMR}$  (126 MHz,  $\text{CDCl}_3$ ):  $\delta$  170.4, 170.2, 169.1, 153.7, 153.7, 71.5, 67.3, 61.4, 49.4, 43.5, 23.0, 22.8, 22.7, 20.7, 20.6, 20.5. HR-MS (APCI)  $m/z$  446.1776;  $[\text{M}+\text{H}]^+$  requires 446.1775.

*O*-(2-Acetamido-3,4,6-tri-*O*-acetyl-2-deoxy-D-glucopyranosylidene)amino *N*-(2-methylprop-1-yl)carbamate **24**

Using **2** and 2-methylpropylamine according to Procedure 1 and flash chromatography (EtOAc:hexane 4:1) yielded the triacetate **24** as a colourless oil (73 mg, 74%).  $R_f$  0.23 (EtOAc:hexane 4:1).  $^1\text{H NMR}$  (500 MHz,  $\text{CDCl}_3$ ):  $\delta$  6.22 (d,  $J = 8.5$  Hz, 1H), 5.78 (t,  $J = 5.5$  Hz, 1H), 5.35 (dd,  $J = 8.5, 8.5$  Hz, 1H), 5.27 (dd,  $J = 9.0, 9.0$  Hz, 1H), 4.98 (dd,  $J = 8.5, 8.5$  Hz, 1H), 4.44-4.38 (m, 2H), 4.30 (dd,  $J = 2.0, 12.5$  Hz, 1H), 3.13-3.04 (m, 2H), 2.13 (s, 3H), 2.08 (s, 3H), 2.07 (s, 3H), 2.03 (s, 3H), 1.81 (septet,  $J = 7.5$  Hz, 1H) 0.93 (d,  $J = 6.5$  Hz, 6H).  $^{13}\text{C NMR}$  (126 MHz,  $\text{CDCl}_3$ ):  $\delta$  170.4, 170.4, 170.2, 169.1, 154.8, 153.7, 77.3, 71.4, 67.3, 61.4, 49.4, 48.5, 28.5, 23.0, 20.6, 20.6, 20.5, 19.9. HR-MS (APCI)  $m/z$  460.1943;  $[\text{M}+\text{H}]^+$  requires 460.1931.

*O*-(2-Acetamido-3,4,6-tri-*O*-acetyl-2-deoxy-D-glucopyranosylidene)amino *N*-(2-methylprop-2-yl)carbamate **25**

Using **2** and 2-methylprop-2-ylamine according to Procedure 1 and flash chromatography (EtOAc:hexane 7:3) yielded the triacetate **25** as a colourless oil (62 mg, 62%).  $R_f$  0.45 (EtOAc:hexane 7:3).  $^1\text{H NMR}$  (500 MHz,  $\text{CDCl}_3$ ):  $\delta$  6.84 (d,  $J = 6.5$  Hz, 1H), 5.61 (*br s*, 1H), 5.32-5.30 (m, 2H), 4.93 (dd,  $J = 9.0, 9.0$  Hz, 1H), 4.43-4.38 (m, 2H), 4.28 (dd,  $J = 2.0, 12.5$  Hz, 1H), 2.10 (s, 3H), 2.05 (s, 3H), 2.04 (s, 3H), 2.00 (s, 3H), 1.40 (s, 9H).  $^{13}\text{C NMR}$  (126 MHz,  $\text{CDCl}_3$ ):  $\delta$  170.7, 170.4, 170.2, 169.1, 153.7, 153.1, 77.1, 71.5, 67.3, 61.3, 51.1, 49.4, 28.6, 22.8, 20.6, 20.5, 20.5. HR-MS

(APCI)  $m/z$  460.1926;  $[M+H]^+$  requires 460.1931.

*O*-(2-Acetamido-3,4,6-tri-*O*-acetyl-2-deoxy-D-glucopyranosylidene)amino *N*-(prop-2-en-1-yl)carbamate **26**

Using **2** and allylamine according to Procedure 1 and flash chromatography (EtOAc:hexane 4:1) yielded the triacetate **26** as a colourless oil (66 mg, 63%).  $R_f$  0.32 (EtOAc:hexane 4:1).  $^1\text{H}$  NMR (600 MHz,  $\text{CDCl}_3$ ):  $\delta$  6.94 (d,  $J = 8.4$  Hz, 1H), 6.00 (t,  $J = 5.4$  Hz, 1H), 5.83 (ddt,  $J = 5.2, 10.2, 16.8$  Hz, 1H), 5.33 (dd,  $J = 8.4, 8.4$  Hz, 1H), 5.29 (dd,  $J = 8.4, 8.4$  Hz, 1H), 5.19 (dd,  $J = 1.2, 16.8$  Hz, 1H), 5.14 (dd,  $J = 1.2, 10.2$  Hz, 1H), 4.88 (dd,  $J = 8.4, 8.4$  Hz, 1H), 4.51 (ddd,  $J = 2.4, 3.6, 16.8$  Hz, 1H), 4.41 (dd,  $J = 3.6, 13.2$  Hz, 1H), 4.28 (dd,  $J = 2.4, 13.2$  Hz, 1H), 3.84 (dd,  $J = 5.2, 5.4$  Hz, 2H), 2.10 (s, 3H), 2.04 (s, 6H), 1.99 (s, 3H).  $^{13}\text{C}$  NMR (151 MHz,  $\text{CDCl}_3$ ):  $\delta$  170.4, 170.4, 170.0, 169.1, 154.9, 154.4, 133.6, 116.5, 71.4, 67.2, 61.2, 49.3, 43.4, 22.9, 20.6, 20.6, 20.5. HR-MS (APCI)  $m/z$  444.1619;  $[M+H]^+$  requires 444.1618.

*O*-(2-Acetamido-3,4,6-tri-*O*-acetyl-2-deoxy-D-glucopyranosylidene)amino *N*-(prop-2-yn-1-yl)carbamate **27**

Using **2** and propargylamine according to Procedure 1 and flash chromatography (EtOAc:hexane 17:3) yielded the triacetate **27** as a colourless oil (65 mg, 79%).  $R_f$  0.39 (EtOAc:hexane 9:1).  $^1\text{H}$  NMR (600 MHz,  $\text{CDCl}_3$ ):  $\delta$  7.11 (d,  $J = 8.1$  Hz, 1H), 6.32 (t,  $J = 5.4$  Hz, 1H), 5.34 (dd,  $J = 8.6, 8.6$  Hz, 1H), 5.28 (dd,  $J = 8.6, 8.6$  Hz, 1H), 4.89 (dd,  $J = 8.5, 8.5$  Hz, 1H), 4.51 (ddd,  $J = 2.5, 3.4, 8.8$  Hz, 1H), 4.40 (dd,  $J = 3.4, 12.8$  Hz, 1H), 4.27 (dd,  $J = 2.5, 12.8$  Hz, 1H), 4.08-3.91 (m, 2H), 2.28 (t,  $J = 2.5$  Hz, 1H), 2.09 (s, 3H), 2.03 (s, 6H), 2.00 (s, 3H).  $^{13}\text{C}$  NMR (151 MHz,  $\text{CDCl}_3$ ):  $\delta$  170.6, 170.4, 169.9, 169.1, 154.9, 154.8, 79.2, 76.9, 72.0, 71.3, 67.2, 61.2, 49.1, 30.8, 22.8, 20.5, 20.5, 20.4. HR-MS (APCI)  $m/z$  442.1447;  $[M+H]^+$  requires 442.1462.

*O*-(2-Acetamido-3,4,6-tri-*O*-acetyl-2-deoxy-D-glucopyranosylidene)amino *N*-(2-chloroethyl) carbamate **28**

Using **2** and 2-chloroethanolamine hydrochloride according to Procedure 2 and flash chromatography (EtOAc:hexane 9:1) gave the triacetate **28** as a colourless oil (65 mg, 64%).  $R_f$  0.35 (EtOAc:hexane 9:1).  $^1\text{H}$  NMR (500 MHz,  $\text{CDCl}_3$ )  $\delta$  6.26 (s, 1H), 6.14 (d,  $J = 8.6$  Hz, 1H), 5.35 (dd,  $J = 8.3, 8.3$  Hz, 1H), 5.28 (dd,  $J = 9.3, 9.3$  Hz, 1H), 4.99

(dd,  $J = 9.2, 9.2$  Hz, 1H), 4.48 – 4.38 (m, 2H), 4.32-4.29 (m, 1H), 3.72-3.52 (m, 4H), 2.14 (s, 3H), 2.08 (s, 3H), 2.08 (s, 3H), 2.04 (s, 3H).  $^{13}\text{C}$  NMR (126 MHz,  $\text{CDCl}_3$ )  $\delta$  170.6, 170.5, 170.4, 169.3, 154.7, 154.3, 77.7, 71.4, 67.5, 61.6, 49.5, 44.2, 43.0, 23.2, 20.8, 20.8, 20.7. HR-MS (APCI)  $m/z$  466.1235;  $[\text{M}+\text{H}]^+$  requires 466.1228.

*O*-(2-Acetamido-3,4,6-tri-*O*-acetyl-2-deoxy-D-glucopyranosylidene)amino *N,N*-  
(dimethyl) carbamate **29**

Using **2** and dimethylamine hydrochloride according to Procedure 2 and flash chromatography (EtOAc) gave the triacetate **29** as a colourless oil (77 mg, 88%).  $R_f$  0.34 (EtOAc).  $^1\text{H}$  NMR (600 MHz,  $\text{CDCl}_3$ )  $\delta$  7.23 (d,  $J = 8.2$  Hz, 1H), 5.38 (dd,  $J = 9.4, 9.4$  Hz, 1H), 5.31 (dd,  $J = 9.1, 9.1$  Hz, 1H), 4.88 (dd,  $J = 8.2, 9.6$  Hz, 1H), 4.41 (ddd,  $J = 2.4, 4.0, 9.0$  Hz, 1H), 4.37 (dd,  $J = 4.0, 12.6$  Hz, 1H), 4.29 (dd,  $J = 2.4, 12.6$  Hz, 1H), 2.96 (s, 6H), 2.11 (s, 3H), 2.05 (s, 3H), 2.04 (s, 3H), 1.98 (s, 3H).  $^{13}\text{C}$  NMR (151 MHz,  $\text{CDCl}_3$ )  $\delta$  171.0, 170.5, 170.3, 169.4, 156.4, 154.8, 77.4, 72.2, 67.6, 61.7, 49.8, 37.0, 36.1, 23.0, 20.8, 20.7, 20.7. HR-MS (APCI)  $m/z$  432.1638;  $[\text{M}+\text{H}]^+$  requires 432.1618.

*O*-(2-Acetamido-3,4,6-tri-*O*-acetyl-2-deoxy-D-glucopyranosylidene)amino *N,N*-  
(diethyl) carbamate **30**

Using **2** and diethylamine according to Procedure 2 and flash chromatography (EtOAc) gave the triacetate **30** as a colourless oil (64 mg, 63%).  $R_f$  0.37 (EtOAc).  $^1\text{H}$  NMR (500 MHz,  $\text{CDCl}_3$ )  $\delta$  7.03 (s, 1H), 5.46-5.26 (m, 2H), 4.99 – 4.85 (m, 1H), 4.39 (ddd,  $J = 2.4, 3.9, 8.6$  Hz, 1H), 4.34 (dd,  $J = 4.1, 12.5$  Hz, 1H), 4.28 (dd,  $J = 2.4, 12.7$  Hz, 1H), 3.31 (br s, 4H), 2.11 (s, 3H), 2.05 (s, 6H), 1.99 (s, 3H), 1.16 (app t,  $J = 7.1$  Hz, 6H).  $^{13}\text{C}$  NMR (126 MHz,  $\text{CDCl}_3$ )  $\delta$  170.8, 170.5, 170.3, 169.3, 156.3, 154.2, 77.4, 72.3, 67.5, 61.8, 49.8, 42.7, 41.9, 23.1, 20.8, 20.8, 20.7, 14.1, 13.5. HR-MS (APCI)  $m/z$  460.1922;  $[\text{M}+\text{H}]^+$  requires 460.1931.

*O*-(2-Acetamido-3,4,6-tri-*O*-acetyl-2-deoxy-D-glucopyranosylidene)amino *N,N*-  
(dibutyl) carbamate **31**

Using **2** and dibutylamine according to Procedure 1 and flash chromatography (EtOAc:hexane 17:3) gave the triacetate **31** as a white solid (69 mg, 60%).  $R_f$  0.59 (EtOAc).  $^1\text{H}$  NMR (600 MHz,  $\text{CDCl}_3$ )  $\delta$  7.65 (d,  $J = 8.0$  Hz, 1H), 5.44 (dd,  $J = 9.3,$

9.3 Hz, 1H), 5.29 (dd,  $J = 9.4, 9.4$  Hz, 1H), 4.79 (dd,  $J = 8.6, 8.6$  Hz, 1H), 4.44 (ddd,  $J = 3.0, 3.0, 9.4$  Hz, 1H), 4.35 (dd,  $J = 3.6, 12.7$  Hz, 1H), 4.23 (dd,  $J = 2.4, 12.7$  Hz, 1H), 3.33-3.11 (m, 4H), 2.08 (s, 3H), 2.02 (s, 3H), 2.01 (s, 3H), 1.93 (s, 3H), 1.51 (br s, 4H), 1.29 (br s, 4H), 0.90 (app t,  $J = 7.3$  Hz, 6H).  $^{13}\text{C}$  NMR (151 MHz,  $\text{CDCl}_3$ )  $\delta$  171.0, 170.4, 170.1, 169.3, 156.5, 154.5, 76.4, 72.4, 67.3, 61.4, 49.9, 47.9, 47.1, 30.8, 30.2, 22.8, 20.7, 20.7, 20.6, 20.1, 13.9, 13.9. HR-MS (APCI)  $m/z$  516.2574;  $[\text{M}+\text{H}]^+$  requires 516.2557.

*O*-(2-Acetamido-3,4,6-tri-*O*-acetyl-2-deoxy-D-glucopyranosylidene)amino *N,N*-  
(pentylene) carbamate **32**

Using **2** and piperidine according to Procedure 1 and flash chromatography (EtOAc) gave the triacetate **32** as a colourless oil (90 mg, 86%).  $R_f$  0.35 (EtOAc).  $^1\text{H}$  NMR (500 MHz,  $\text{CDCl}_3$ )  $\delta$  7.44 (d,  $J = 8.3$  Hz, 1H), 5.39 (dd,  $J = 9.4, 9.4$  Hz, 1H), 5.30 (dd,  $J = 9.1, 9.1$  Hz, 1H), 4.83 (dd,  $J = 8.2, 9.5$  Hz, 1H), 4.42 (ddd,  $J = 2.4, 4.1, 9.0$  Hz, 1H), 4.37 (dd,  $J = 4.1, 12.6$  Hz, 1H), 4.28 (dd,  $J = 2.4, 12.7$  Hz, 1H), 3.44 (br s, 4H), 2.11 (s, 3H), 2.04 (s, 3H), 2.03 (s, 3H), 1.97 (s, 3H), 1.69-1.46 (m, 6H).  $^{13}\text{C}$  NMR (126 MHz,  $\text{CDCl}_3$ )  $\delta$  171.0, 170.5, 170.3, 169.4, 156.3, 153.7, 77.4, 72.2, 67.5, 61.7, 49.8, 45.3, 25.7, 24.3, 22.9, 20.8, 20.8, 20.7. HR-MS (APCI)  $m/z$  472.1984;  $[\text{M}+\text{H}]^+$  requires 472.1931.

*O*-(2-Acetamido-3,4,6-tri-*O*-acetyl-2-deoxy-D-glucopyranosylidene)amino *N,N*-  
(ethyleneoxyethylene) carbamate **33**

Using **2** and morpholine according to Procedure 1 and flash chromatography (MeOH/EtOAc 1:24) gave the triacetate **33** as a colourless oil (71 mg, 68%).  $R_f$  0.41 (MeOH/EtOAc 1:19).  $^1\text{H}$  NMR (600 MHz,  $\text{CDCl}_3$ )  $\delta$  7.09 (d,  $J = 8.1$  Hz, 1H), 5.40 (dd,  $J = 9.4, 9.4$  Hz, 1H), 5.30 (dd,  $J = 9.1, 9.1$  Hz, 1H), 4.82 (dd,  $J = 8.1, 9.5$  Hz, 1H), 4.44 (ddd,  $J = 2.4, 3.8, 8.9$  Hz, 1H), 4.37 (dd,  $J = 3.9, 12.7$  Hz, 1H), 4.31 (dd,  $J = 2.5, 12.7$  Hz, 1H), 3.69 (s, 4H), 3.51 (s, 4H), 2.11 (s, 3H), 2.06 (s, 3H), 2.04 (s, 3H), 1.99 (s, 3H).  $^{13}\text{C}$  NMR (151 MHz,  $\text{CDCl}_3$ )  $\delta$  170.9, 170.4, 170.2, 169.4, 156.7, 153.5, 72.0, 67.5, 66.6, 61.6, 49.9, 44.4, 44.2, 23.0, 20.8, 20.8, 20.7. HR-MS (APCI)  $m/z$  474.1725;  $[\text{M}+\text{H}]^+$  requires 474.1724.

*General preparation of carbamates 34-63*

A saturated solution of NH<sub>3</sub> in MeOH (10 mL) prepared at 0°C was added to a solution of the appropriate 3,4,6-tri-*O*-acetyl carbamate (1.0 equiv) in MeOH (25 mL/mmol) at 0°C. After 2 h. at 0°C, the reaction mixture was concentrated.

*O*-(2-Acetamido-2-deoxy-D-glucopyranosylidene)amino *N*-(4-methylphenyl)  
carbamate **34**

Using **4** and flash chromatography (MeOH:EtOAc 3:17) of the resultant residue gave a clear oil which was precipitated with EtOAc to yield the title compound **34** as a white solid (15 mg, 26%). m.p. 182-184°C (dec.). *R<sub>f</sub>* 0.21 (MeOH:EtOAc 3:17). <sup>1</sup>H NMR (500 MHz, CD<sub>3</sub>OD): δ 7.31 (AA'BB', 2H), 7.10 (AA'BB', 2H), 4.57 (d, *J* = 9.0 Hz, 1H), 3.97-3.94 (m, 2H), 3.85 (dd, *J* = 4.5, 13.0 Hz, 1H), 3.75 (dd, *J* = 8.5, 8.5 Hz, 1H), 3.73 (dd, *J* = 8.5, 8.5 Hz, 1H), 2.28 (s, 3H), 2.07 (s, 3H). <sup>13</sup>C NMR (126 MHz, CD<sub>3</sub>OD): δ 173.8, 159.3, 154.8, 136.7, 134.4, 130.4, 120.4, 84.1, 74.5, 69.8, 61.7, 52.9, 22.8, 20.8. HR-MS (APCI) *m/z* 368.1462; [M+H]<sup>+</sup> requires 368.1458.

*O*-(2-Acetamido-2-deoxy-D-glucopyranosylidene)amino *N*-(4-methoxyphenyl)  
carbamate **35**

Using **5** and flash chromatography (MeOH:EtOAc 9:91) of the resultant residue gave a clear oil which was precipitated with EtOAc to yield the title compound **5** as a white solid (20 mg, 28%). m.p. 136-140°C (dec.). *R<sub>f</sub>* 0.15 (MeOH:EtOAc 3:17). <sup>1</sup>H NMR (600 MHz, CD<sub>3</sub>OD): δ 7.34 (AA'BB', 2H), 6.88 (AA'BB', 2H), 4.59 (d, *J* = 9.6 Hz, 1H), 4.57 (s, 1H), 3.98-3.95 (m, 2H), 3.86 (dd, *J* = 4.8, 13.2 Hz, 1H), 3.80-3.72 (m, 5H), 2.06 (s, 3H). <sup>13</sup>C NMR (126 MHz, CD<sub>3</sub>OD): δ 173.8, 159.2, 157.7, 155.1, 132.1, 122.2, 115.1, 84.1, 74.5, 69.8, 61.7, 55.9, 52.9, 22.8. HR-MS (APCI) *m/z* 384.1418; [M+H]<sup>+</sup> requires 384.1407.

*O*-(2-Acetamido-2-deoxy-D-glucopyranosylidene)amino *N*-(4-bromophenyl)  
carbamate **36**

Using **6** and flash chromatography (MeOH:EtOAc 3:17) of the resultant residue gave a clear oil which was precipitated with EtOAc to yield the title compound **36** as a white solid (30 mg, 43%). m.p. 176-180°C (dec.). *R<sub>f</sub>* 0.30 (MeOH:EtOAc 3:17). <sup>1</sup>H NMR (600 MHz, (CD<sub>3</sub>)<sub>2</sub>SO): δ 9.81 (s, 1H), 8.32 (d, *J* = 8.0 Hz, 1H), 7.53-7.39 (m,

6H), 5.50 (t,  $J = 4.8$  Hz, 2H), 4.90 (t,  $J = 5.1$  Hz, 1H), 4.52 (dd,  $J = 6.5, 14.2$  Hz, 1H), 4.37 (t,  $J = 8.2$  Hz, 1H), 3.97-3.91 (m, 1H), 3.79-3.74 (m, 1H), 3.70-3.61 (m, 2H), 3.58 (t,  $J = 7.3$  Hz, 1H), 1.88 (s, 3H).  $^{13}\text{C}$  NMR (151 MHz,  $(\text{CD}_3)_2\text{SO}$ ):  $\delta$  169.2, 158.4, 151.7, 138.1, 131.6, 120.5, 114.4, 82.4, 72.2, 68.6, 60.0, 51.1, 22.7. HR-MS (APCI)  $m/z$  432.0414;  $[\text{M}+\text{H}]^+$  requires 432.0406.

*O*-(2-Acetamido-2-deoxy-D-glucopyranosylidene)amino *N*-benzylcarbamate **37**

Using **7** and flash chromatography (MeOH:EtOAc 1:9) of the resultant residue gave a clear oil which was precipitated with EtOAc to yield the title compound **37** as a white solid (15 mg, 40%). m.p. 150-156°C (dec.).  $R_f$  0.23 (MeOH:EtOAc 3:17).  $^1\text{H}$  NMR (600 MHz,  $\text{CD}_3\text{OD}$ ):  $\delta$  7.33-7.25 (m, 5H), 4.57 (s, 1H), 4.54 (d,  $J = 9.3$  Hz, 1H), 4.39-4.34 (m, 2H), 3.95-3.91 (m, 2H) 3.84 (dd,  $J = 4.4, 12.9$  Hz, 1H), 3.75 (dd,  $J = 9.0, 9.0$  Hz, 1H), 3.71 (dd,  $J = 8.4, 8.4$  Hz, 1H), 1.99 (s, 3H).  $^{13}\text{C}$  NMR (126 MHz,  $\text{CD}_3\text{OD}$ ):  $\delta$  173.8, 158.6, 158.1, 140.0, 129.6, 128.4, 84.1, 74.4, 69.7, 61.6, 52.8, 45.6, 22.7. HR-MS (APCI)  $m/z$  368.1460;  $[\text{M}+\text{H}]^+$  requires 368.1458.

*O*-(2-Acetamido-2-deoxy-D-glucopyranosylidene)amino *N*-cyclopropylcarbamate **38**

Using **8** and flash chromatography (MeOH:EtOAc 3:17) of the resultant residue gave a clear oil which was precipitated with EtOAc to yield the title compound **38** as a white solid (21 mg, 46%). m.p. 148-152°C (dec.).  $R_f$  0.15 (MeOH:EtOAc 3:17).  $^1\text{H}$  NMR (600 MHz,  $\text{CD}_3\text{OD}$ ):  $\delta$  4.57 (s, 1H), 4.53 (d,  $J = 9.0$  Hz, 1H), 3.93-3.91 (m, 2H), 3.84 (dd,  $J = 4.2, 12.6$  Hz, 1H), 3.74 (dd,  $J = 8.4, 8.4$  Hz, 1H), 3.70 (dd,  $J = 9.0, 9.0$  Hz, 1H), 2.59 (tt,  $J = 3.8, 7.2$  Hz, 1H), 2.04 (s, 3H), 0.73-0.71 (m, 2H), 0.53-0.51 (m, 2H).  $^{13}\text{C}$  NMR (126 MHz,  $\text{CD}_3\text{OD}$ ):  $\delta$  173.8, 158.7, 158.6, 84.0, 74.5, 69.7, 61.6, 52.8, 24.0, 22.8, 6.8. HR-MS (APCI)  $m/z$  318.1297;  $[\text{M}+\text{H}]^+$  requires 318.1301.

*O*-(2-Acetamido-2-deoxy-D-glucopyranosylidene)amino *N*-cyclobutylcarbamate **39**

Using **9** and flash chromatography (MeOH:EtOAc 3:17) of the resultant residue gave a clear oil which was precipitated with EtOAc to yield the title compound **39** as a white solid (38 mg, 77%). m.p. 130-134°C (dec.).  $R_f$  0.17 (MeOH:EtOAc 3:17).  $^1\text{H}$  NMR (600 MHz,  $\text{CD}_3\text{OD}$ ):  $\delta$  4.57 (s, 1H), 4.54 (d,  $J = 9.6$  Hz, 1H), 4.12 (q,  $J = 8.3$  Hz, 1H), 3.94-3.92 (m, 2H), 3.84 (dd,  $J = 3.6, 12.6$  Hz, 1H), 3.75 (dd,  $J = 9.0, 9.0$  Hz, 1H), 3.71 (dd,  $J = 9.0, 9.0$  Hz, 1H), 2.31-2.25 (m, 2H), 2.05 (s, 3H), 2.01-1.96 (m,



2H), 1.75-1.67 (m, 2H). <sup>13</sup>C NMR (151 MHz, CD<sub>3</sub>OD): δ 173.8, 158.5, 156.7, 84.0, 74.2, 69.8, 61.7, 52.9, 47.5, 31.5, 22.8, 15.6. HR-MS (APCI) *m/z* 332.1473; [M+H]<sup>+</sup> requires 332.1458.

*O*-(2-Acetamido-2-deoxy-D-glucopyranosylidene)amino *N*-cyclopentylcarbamate **40**

Using **10** and flash chromatography (MeOH:EtOAc 3:22) of the resultant residue gave a clear oil which was precipitated with EtOAc to yield the title compound **40** as a white solid (24 mg, 50%). m.p. 140-144°C (dec.). *R<sub>f</sub>* 0.17 (MeOH:EtOAc 3:17). <sup>1</sup>H NMR (600 MHz, CD<sub>3</sub>OD): δ 4.56 (s, 1H), 4.52 (d, *J* = 9.6 Hz, 1H), 3.97-3.90 (m, 3H), 3.84 (dd, *J* = 4.2, 12.6 Hz, 1H), 3.75 (dd, *J* = 8.4, 8.4 Hz, 1H), 3.71 (dd, *J* = 9.0, 9.0 Hz, 1H), 2.04 (s, 3H), 1.96-1.91 (m, 2H), 1.75-1.68 (m, 2H), 1.65-1.58 (m, 2H), 1.53-1.47 (m, 2H). <sup>13</sup>C NMR (151 MHz, CD<sub>3</sub>OD): δ 173.7, 158.2, 157.3, 84.0, 74.3, 69.8, 61.6, 54.1, 52.9, 33.7, 24.5, 22.8. HR-MS (APCI) *m/z* 346.1611; [M+H]<sup>+</sup> requires 346.1614.

*O*-(2-Acetamido-2-deoxy-D-glucopyranosylidene)amino *N*-cyclohexylcarbamate **41**

Using **11** and flash chromatography (MeOH:EtOAc 1:9) of the resultant residue gave a clear oil which was precipitated with EtOAc to yield the title compound **41** as a white solid (32 mg, 66%). m.p. 158-162°C (dec.). *R<sub>f</sub>* 0.24 (MeOH:EtOAc 3:17). <sup>1</sup>H NMR (600 MHz, CD<sub>3</sub>OD): δ 4.57 (s, 1H), 4.53 (d, *J* = 8.0 Hz, 1H), 3.94-3.90 (m, 2H), 3.84 (dd, *J* = 4.2, 12.6 Hz, 1H), 3.75 (dd, *J* = 9.0, 9.0 Hz, 1H), 3.70 (dd, *J* = 9.0, 9.0 Hz, 1H), 3.49-3.42 (m, 1H), 2.04 (s, 3H), 1.92-1.86 (m, 2H), 1.76-1.71 (m, 2H), 1.64-1.60 (m, 1H), 1.41-1.34 (m, 2H), 1.31-1.22 (m, 3H). <sup>13</sup>C NMR (126 MHz, CD<sub>3</sub>OD): δ 173.7, 158.2, 157.0, 84.0, 74.3, 69.8, 61.6, 52.9, 51.4, 33.8, 26.6, 25.9, 22.8. HR-MS (APCI) *m/z* 360.1765; [M+H]<sup>+</sup> requires 360.1771.

*O*-(2-Acetamido-2-deoxy-D-glucopyranosylidene)amino *N*-(adamant-1-yl)carbamate **42**

Using **12** and flash chromatography (MeOH:EtOAc 1:9) of the resultant residue gave a clear oil which was precipitated with EtOAc to yield the title compound **42** as a white solid (46 mg, 63%). m.p. 154-160°C (dec.). *R<sub>f</sub>* 0.19 (MeOH:EtOAc 3:17). <sup>1</sup>H NMR (600 MHz, CD<sub>3</sub>OD): δ 4.57 (s, 1H), 4.51 (d, *J* = 10.2 Hz, 1H), 3.93 (dd, *J* = 2.4, 12.6 Hz, 1H), 3.89 (ddd, *J* = 2.4, 3.6, 9.0 Hz, 1H), 3.84 (dd, *J* = 3.6, 12.6 Hz, 1H),

3.74 (dd,  $J = 9.0, 9.0$  Hz, 1H), 3.70 (dd,  $J = 9.0, 9.0$  Hz, 1H), 2.08 (*br s*, 3H), 2.04 (s, 3H), 2.00-1.97 (m, 6H), 1.75-1.70 (m, 6H).  $^{13}\text{C}$  NMR (126 MHz,  $\text{CD}_3\text{OD}$ ):  $\delta$  174.0, 157.6, 155.4, 84.0, 74.2, 69.8, 61.7, 52.9, 52.0, 42.5, 37.4, 30.9, 22.8. HR-MS (APCI)  $m/z$  412.2077;  $[\text{M}+\text{H}]^+$  requires 412.2084.

*O*-(2-Acetamido-2-deoxy-D-glucopyranosylidene)amino *N*-(2-amino-2-oxoeth-1-yl)carbamate **43**

Using **13** and flash chromatography (MeOH:EtOAc 3:7) of the resultant residue gave a clear oil which was precipitated with EtOAc to yield the title compound **43** as a white solid (16 mg, 55%). m.p. 136-140°C (dec.).  $R_f$  0.17 (MeOH:EtOAc 3:7).  $^1\text{H}$  NMR (600 MHz,  $\text{CD}_3\text{OD}$ ):  $\delta$  4.55 (d,  $J = 9.0$  Hz, 1H), 3.96-3.93 (m, 2H), 3.89-3.83 (m, 3H), 3.76 (dd,  $J = 8.4, 8.4$  Hz, 1H), 3.72 (dd,  $J = 9.0, 9.0$  Hz, 1H), 2.06 (s, 3H).  $^{13}\text{C}$  NMR (126 MHz,  $\text{CD}_3\text{OD}$ ):  $\delta$  173.91, 173.86, 158.7, 158.0, 84.2, 74.3, 69.7, 61.6, 52.8, 44.4, 22.8. HR-MS (APCI)  $m/z$  335.1200;  $[\text{M}+\text{H}]^+$  requires 335.1203.

*O*-(2-Acetamido-2-deoxy-D-glucopyranosylidene)amino (*S*)-*N*-(1-amino-1-oxoprop-2-yl)carbamate **44**

Using **14** and flash chromatography (MeOH:EtOAc 1:4) of the resultant residue gave a clear oil which was precipitated with EtOAc to yield the title compound **44** as a white solid (35 mg, 56%). m.p. 108-112°C (dec.).  $R_f$  0.24 (MeOH:EtOAc 3:7).  $^1\text{H}$  NMR (600 MHz,  $\text{CD}_3\text{OD}$ ):  $\delta$  4.57 (s, 1H), 4.53 (d,  $J = 9.0$  Hz, 1H), 4.22 (q,  $J = 7.2$  Hz, 1H), 3.97-3.92 (m, 2H), 3.85 (dd,  $J = 3.6, 12.4$  Hz, 1H), 3.75 (dd,  $J = 9.0, 9.0$  Hz, 1H), 3.72 (dd,  $J = 9.0, 9.0$  Hz, 1H), 2.07 (s, 3H), 1.39 (d,  $J = 7.2$  Hz, 3H).  $^{13}\text{C}$  NMR (126 MHz,  $\text{CD}_3\text{OD}$ ):  $\delta$  177.1, 173.9, 158.4, 157.0, 84.2, 74.1, 69.7, 61.6, 52.9, 51.4, 22.8, 19.2. HR-MS (APCI)  $m/z$  349.1352;  $[\text{M}+\text{H}]^+$  requires 349.1359.

*O*-(2-Acetamido-2-deoxy-D-glucopyranosylidene)amino *N*-((*S*)-1-amino-3-hydroxy-1-oxo-prop-2-yl) carbamate **45**

Using **15** and flash chromatography (MeOH/EtOAc 3:7) of the resultant residue gave a colourless oil which was treated with EtOAc to give **45** as a white solid (16 mg, 31%).  $R_f$  0.26 (MeOH/EtOAc 7:13).  $^1\text{H}$  NMR (600 MHz,  $\text{D}_2\text{O}$ )  $\delta$  4.62 (d,  $J = 9.9$  Hz, 1H), 4.30 (dd,  $J = 4.6, 4.6$  Hz, 1H), 4.13-4.07 (m, 1H), 4.01 (dd,  $J = 2.2, 12.9$  Hz, 1H), 3.94-3.77 (m, 5H), 2.09 (s, 3H).  $^{13}\text{C}$  NMR (151 MHz,  $\text{D}_2\text{O}$ )  $\delta$  175.5, 175.3,

158.8, 157.4, 83.2, 72.8, 68.6, 62.4, 60.9, 57.3, 52.2, 22.9. HR-MS (APCI)  $m/z$  365.1309;  $[M+H]^+$  requires 365.1309.

*O*-(2-Acetamido-2-deoxy-D-glucopyranosylidene)amino (S)-*N*-(1-amino-1-oxo-3-phenylprop-2-yl)carbamate **46**

Using **16** and flash chromatography (MeOH:EtOAc 3:7) of the resultant residue gave a clear oil which was precipitated with EtOAc to yield the title compound **46** as a white solid (28 mg, 46%). m.p. 118-122°C (dec.).  $R_f$  0.32 (MeOH:EtOAc 3:7).  $^1H$  NMR (600 MHz, CD<sub>3</sub>OD):  $\delta$  7.29-7.18 (m, 5H), 4.57 (s, 1H), 4.53 (d,  $J = 9.6$  Hz, 1H), 4.46 (dd,  $J = 5.4, 7.8$  Hz, 1H), 3.93-3.89 (m, 2H), 3.83 (dd,  $J = 4.2, 12.6$  Hz, 1H), 3.75 (dd,  $J = 8.4, 8.4$  Hz, 1H), 3.69 (dd,  $J = 9.6, 9.6$  Hz, 1H), 3.14 (dd,  $J = 5.4, 13.8$  Hz, 1H), 2.94 (dd,  $J = 8.4, 13.8$  Hz, 1H), 2.01 (s, 3H).  $^{13}C$  NMR (151 MHz, CD<sub>3</sub>OD):  $\delta$  175.7, 173.8, 158.4, 157.0, 137.9, 130.4, 129.5, 127.9, 84.2, 74.2, 69.7, 61.6, 57.1, 52.8, 39.6, 22.8. HR-MS (APCI)  $m/z$  425.1679;  $[M+H]^+$  requires 425.1672.

*O*-(2-Acetamido-2-deoxy-D-glucopyranosylidene)amino *N*-(2-hexylamino-2-oxoethyl-1-yl) carbamate **47**

Using **17** and flash chromatography (MeOH/EtOAc 1:3) of the resultant residue gave a colourless oil which was treated with EtOAc to give **47** as a white solid (21 mg, 34%).  $R_f$  0.33 (MeOH/EtOAc 1:3).  $^1H$  NMR (600 MHz, CD<sub>3</sub>OD)  $\delta$  4.56 (d,  $J = 9.3$  Hz, 1H), 3.99-3.91 (m, 2H), 3.88-3.68 (m, 5H), 3.20 (app t,  $J = 7.2$  Hz, 2H), 2.06 (s, 3H), 1.55-1.45 (m, 2H), 1.39-1.23 (m, 6H), 0.91 (app t,  $J = 6.7$  Hz, 3H).  $^{13}C$  NMR (151 MHz, CD<sub>3</sub>OD)  $\delta$  173.8, 171.1, 158.7, 158.0, 84.1, 74.3, 69.7, 61.6, 52.8, 44.7, 40.5, 32.7, 30.4, 27.6, 23.6, 22.8, 14.4. HR-MS (APCI)  $m/z$  419.2124;  $[M+H]^+$  requires 419.2142.

*O*-(2-Acetamido-2-deoxy-D-glucopyranosylidene)amino *N*-methyl carbamate **48**

Using **18** and flash chromatography (MeOH/EtOAc 1:3) of the resultant residue gave a colourless oil which was treated with EtOAc to give **48** as a white solid (18 mg, 65%). The  $^1H$  NMR spectrum was consistent with that found in the literature.<sup>8</sup>

*O*-(2-Acetamido-2-deoxy-D-glucopyranosylidene)amino *N*-ethyl carbamate **49**

Using **19** and flash chromatography (MeOH/EtOAc 1:4) of the resultant residue gave

a colourless oil which was treated with EtOAc to give **49** as a white solid (9 mg, 22%).  $R_f$  0.26 (MeOH/EtOAc 1:4).  $^1\text{H}$  NMR (600 MHz,  $\text{CD}_3\text{OD}$ )  $\delta$  4.61-4.48 (m, 2H), 3.99-3.89 (m, 2H), 3.84 (dd,  $J = 4.5, 13.0$  Hz, 1H), 3.75 (dd,  $J = 8.7, 8.7$  Hz, 1H), 3.71 (dd,  $J = 9.0, 9.0$  Hz, 1H), 3.21 (q,  $J = 7.2$  Hz, 2H), 2.04 (s, 3H), 1.14 (t,  $J = 7.2$  Hz, 3H).  $^{13}\text{C}$  NMR (151 MHz,  $\text{CD}_3\text{OD}$ )  $\delta$  173.8, 158.4, 157.8, 84.0, 74.4, 69.7, 61.6, 52.8, 36.8, 22.8, 15.2. HR-MS (APCI)  $m/z$  306.1311;  $[\text{M}+\text{H}]^+$  requires 306.1301.

*O*-(2-Acetamido-2-deoxy-D-glucopyranosylidene)amino *N*-(prop-1-yl)carbamate **50**

Using **20** and flash chromatography (MeOH:EtOAc 3:17) of the resultant residue gave a clear oil which was precipitated with EtOAc to yield the title compound **50** as a white solid (31 mg, 72%). m.p. 130-136°C (dec.).  $R_f$  0.11 (MeOH:EtOAc 3:17).  $^1\text{H}$  NMR (600 MHz,  $\text{CD}_3\text{OD}$ ):  $\delta$  4.54 (d,  $J = 9.6$  Hz, 1H), 3.94-3.91 (m, 2H), 3.84 (dd,  $J = 4.2, 13.2$  Hz, 1H), 3.75 (dd,  $J = 8.4, 8.4$  Hz, 1H), 3.71 (dd,  $J = 9.0, 9.0$  Hz, 1H), 3.14 (t,  $J = 7.2$  Hz, 2H), 2.04 (s, 3H), 1.54 (tq,  $J = 7.2, 7.2$  Hz, 2H), 0.93 (t,  $J = 7.2$  Hz, 3H).  $^{13}\text{C}$  NMR (151 MHz,  $\text{CD}_3\text{OD}$ ):  $\delta$  173.7, 158.3, 158.0, 84.0, 74.4, 69.7, 61.6, 52.8, 43.7, 23.9, 22.8, 11.5. HR-MS (APCI)  $m/z$  320.1453;  $[\text{M}+\text{H}]^+$  requires 320.1458.

*O*-(2-Acetamido-2-deoxy-D-glucopyranosylidene)amino *N*-(but-1-yl)carbamate **51**

Using **21** and flash chromatography (MeOH:EtOAc 3:22) of the resultant residue gave a clear oil which was precipitated with EtOAc to yield the title compound **51** as a white solid (32 mg, 68%). m.p. 84-88°C.  $R_f$  0.24 (MeOH:EtOAc 3:17).  $^1\text{H}$  NMR (600 MHz,  $\text{CD}_3\text{OD}$ ):  $\delta$  4.54 (d,  $J = 9.3$  Hz, 1H), 3.94-3.91 (m, 2H), 3.84 (dd,  $J = 3.6, 12.0$  Hz, 1H), 3.75 (dd,  $J = 8.6, 8.6$  Hz, 1H), 3.71 (dd,  $J = 9.0, 9.0$  Hz, 1H), 3.18 (t,  $J = 7.0$  Hz, 2H), 2.04 (s, 3H), 1.51 (tt,  $J = 7.0, 7.0$  Hz, 2H), 1.36 (tq,  $J = 7.0, 7.4$  Hz, 2H), 0.94 (t,  $J = 7.4$  Hz, 3H).  $^{13}\text{C}$  NMR (151 MHz,  $\text{CD}_3\text{OD}$ ):  $\delta$  173.7, 158.3, 158.0, 84.0, 74.4, 69.7, 61.6, 52.8, 41.6, 32.8, 22.8, 20.9, 14.0. HR-MS (APCI)  $m/z$  334.1611;  $[\text{M}+\text{H}]^+$  requires 334.1614.

*O*-(2-Acetamido-2-deoxy-D-glucopyranosylidene)amino *N*-(hex-1-yl)carbamate **52**

Using **22** and flash chromatography (MeOH:EtOAc 3:22) of the resultant residue gave a clear oil which was precipitated with EtOAc to yield the title compound **52** as a

white solid (30 mg, 62%). m.p. 134-138°C (dec.).  $R_f$  0.14 (MeOH:EtOAc 3:22).  $^1\text{H}$  NMR (600 MHz,  $\text{CD}_3\text{OD}$ ):  $\delta$  4.54 (d,  $J = 9.0$  Hz, 1H), 3.94-3.91 (m, 2H), 3.84 (dd,  $J = 4.2, 13.2$  Hz, 1H), 3.75 (dd,  $J = 8.4, 8.4$  Hz, 1H), 3.71 (dd,  $J = 9.0, 9.0$  Hz, 1H), 3.18 (t,  $J = 6.6$  Hz, 2H), 2.04 (s, 3H), 1.54-1.49 (m, 2H), 1.38-1.29 (m, 6H), 0.91 (t,  $J = 7.2$  Hz, 3H).  $^{13}\text{C}$  NMR (151 MHz,  $\text{CD}_3\text{OD}$ ):  $\delta$  173.7, 158.3, 158.0, 84.0, 74.4, 69.7, 61.6, 52.8, 42.0, 32.7, 30.7, 27.5, 23.6, 22.8, 14.4. HR-MS (APCI)  $m/z$  362.1915;  $[\text{M}+\text{H}]^+$  requires 362.1927.

*O*-(2-Acetamido-2-deoxy-D-glucopyranosylidene)amino *N*-(prop-2-yl)carbamate **53**  
Using **23** and flash chromatography (MeOH:EtOAc 3:17) of the resultant residue gave a clear oil which was precipitated with EtOAc to yield the title compound **53** as a white solid (23 mg, 71%). m.p. 132-136°C (dec.).  $R_f$  0.14 (MeOH:EtOAc 3:17).  $^1\text{H}$  NMR (600 MHz,  $\text{CD}_3\text{OD}$ ):  $\delta$  4.56 (s, 1H), 4.53 (d,  $J = 8.4$  Hz, 1H), 3.94-3.91 (m, 2H), 3.84 (dd,  $J = 3.6, 12.6$  Hz, 1H), 3.80-3.69 (m, 3H), 2.04 (s, 3H), 1.17 (d,  $J = 6.6$  Hz, 6H).  $^{13}\text{C}$  NMR (151 MHz,  $\text{CD}_3\text{OD}$ ):  $\delta$  173.7, 158.3, 157.0, 84.0, 74.4, 69.8, 61.7, 52.9, 44.5, 22.8. HR-MS (APCI)  $m/z$  320.1464;  $[\text{M}+\text{H}]^+$  requires 320.1458.

*O*-(2-Acetamido-2-deoxy-D-glucopyranosylidene)amino *N*-(2-methylprop-1-yl)carbamate **54**

Using **24** and flash chromatography (MeOH:EtOAc 3:17) of the resultant residue gave a clear oil which was precipitated with EtOAc to yield the title compound **54** as a white solid (32 mg, 63%). m.p. 120-124°C (dec.).  $R_f$  0.18 (MeOH:EtOAc 3:17).  $^1\text{H}$  NMR (600 MHz,  $\text{CD}_3\text{OD}$ ):  $\delta$  4.54 (d,  $J = 9.6$  Hz, 1H), 3.97-3.93 (m, 2H), 3.84 (dd,  $J = 3.0, 12.0$  Hz, 1H), 3.75 (dd,  $J = 9.0, 9.0$  Hz, 1H), 3.71 (dd,  $J = 8.4, 8.4$  Hz, 1H), 3.01 (d,  $J = 6.0$  Hz, 2H), 2.04 (s, 3H), 1.81-1.76 (m, 1H), 0.91 (d,  $J = 6.6$  Hz, 6H).  $^{13}\text{C}$  NMR (151 MHz,  $\text{CD}_3\text{OD}$ ):  $\delta$  173.7, 158.3, 158.1, 84.0, 74.3, 69.7, 61.6, 52.9, 49.4, 29.9, 22.8, 20.2. HR-MS (APCI)  $m/z$  334.1605;  $[\text{M}+\text{H}]^+$  requires 334.1614.

*O*-(2-Acetamido-2-deoxy-D-glucopyranosylidene)amino *N*-(2-methylprop-2-yl)carbamate **55**

Using **25** and flash chromatography (MeOH:EtOAc 3:17) of the resultant residue gave a clear oil which was precipitated with EtOAc to yield the title compound **55** as a white solid (23 mg, 51%). m.p. 112-116°C (dec.).  $R_f$  0.15 (MeOH:EtOAc 4:21).  $^1\text{H}$

NMR (600 MHz, CD<sub>3</sub>OD):  $\delta$  4.52 (d,  $J$  = 9.6 Hz, 1H), 3.93 (dd,  $J$  = 2.4, 12.6 Hz, 1H), 3.90 (ddd,  $J$  = 2.4, 3.6, 9.0 Hz, 1H), 3.84 (dd,  $J$  = 3.6, 12.6 Hz, 1H), 3.74 (dd,  $J$  = 9.0, 9.0 Hz, 1H), 3.70 (dd,  $J$  = 9.6, 9.6 Hz, 1H), 2.04 (s, 3H), 1.33 (s, 9H). <sup>13</sup>C NMR (151 MHz, CD<sub>3</sub>OD):  $\delta$  173.7, 157.7, 155.9, 84.0, 74.3, 69.8, 61.7, 52.9, 51.6, 28.9, 22.7. HR-MS (APCI)  $m/z$  334.1627; [M+H]<sup>+</sup> requires 334.1614.

*O*-(2-Acetamido-2-deoxy-D-glucopyranosylidene)amino *N*-(prop-2-en-1-yl)carbamate  
**56**

Using **26** and flash chromatography (MeOH:EtOAc 3:22) of the resultant residue gave a clear oil which was precipitated with EtOAc to yield the title compound **56** as a white solid (28 mg, 58%). m.p. 80-84°C.  $R_f$  0.14 (MeOH:EtOAc 9:41). <sup>1</sup>H NMR (600 MHz, CD<sub>3</sub>OD):  $\delta$  5.87 (ddt,  $J$  = 4.8, 10.8, 17.4 Hz, 1H), 5.20 (dd,  $J$  = 1.2, 17.4 Hz, 1H), 5.11 (dd,  $J$  = 1.2, 10.8 Hz, 1H), 4.54 (d,  $J$  = 9.6 Hz, 1H), 3.94-3.92 (m, 2H), 3.84 (dd,  $J$  = 4.2, 13.2 Hz, 1H), 3.80 (d,  $J$  = 4.8 Hz, 2H), 3.76 (dd,  $J$  = 9.0, 9.0 Hz, 1H), 3.71 (dd,  $J$  = 9.0, 9.0 Hz, 1H), 2.03 (s, 3H). <sup>13</sup>C NMR (151 MHz, CD<sub>3</sub>OD):  $\delta$  173.7, 158.5, 157.8, 135.6, 116.1, 84.1, 74.4, 69.7, 61.6, 52.8, 44.2, 22.8. HR-MS (APCI)  $m/z$  318.1297; [M+H]<sup>+</sup> requires 318.1301.

*O*-(2-Acetamido-2-deoxy-D-glucopyranosylidene)amino *N*-(prop-2-yn-1-yl)  
carbamate **57**

Using **27** and flash chromatography (MeOH:EtOAc 3:17) of the resultant residue gave a clear oil which was precipitated with EtOAc to yield the title compound **57** as a white solid (26 mg, 56%). m.p. 104-110°C (dec.).  $R_f$  0.19 (MeOH:EtOAc 4:21). <sup>1</sup>H NMR (600 MHz, CD<sub>3</sub>OD):  $\delta$  4.56 (d,  $J$  = 9.0 Hz, 1H), 3.96 (d,  $J$  = 3.0 Hz, 2H), 3.95-3.92 (m, 2H), 3.85 (dd,  $J$  = 4.8, 13.2 Hz, 1H), 3.76 (dd,  $J$  = 9.0, 9.0 Hz, 1H), 3.72 (dd,  $J$  = 9.0, 9.0 Hz, 1H), 2.61 (t,  $J$  = 2.5 Hz, 1H), 2.05 (s, 3H). <sup>13</sup>C NMR (151 MHz, CD<sub>3</sub>OD):  $\delta$  173.8, 158.9, 157.5, 84.1, 80.6, 74.4, 72.4, 69.7, 61.6, 52.8, 31.2, 22.8. HR-MS (APCI)  $m/z$  316.1137; [M+H]<sup>+</sup> requires 316.1145.

*O*-(2-Acetamido-2-deoxy-D-glucopyranosylidene)amino *N*-(2-chloroethyl) carbamate  
**58**

Using **28** and flash chromatography (MeOH/EtOAc 3:17) of the resultant residue gave a colourless oil which was treated with EtOAc to give **58** as a white solid (27 mg,

59%).  $R_f$  0.18 (MeOH/EtOAc 3:17).  $^1\text{H}$  NMR (600 MHz,  $\text{CD}_3\text{OD}$ )  $\delta$  4.55 (d,  $J = 10.3$  Hz, 1H), 3.91-3.95 (m, 2H), 3.85 (dd,  $J = 4.3, 13.1$  Hz, 1H), 3.77-3.71 (m, 2H), 3.65-3.63 (m, 2H), 3.52-3.50 (m, 2H), 2.04 (s, 3H).  $^{13}\text{C}$  NMR (151 MHz,  $\text{CD}_3\text{OD}$ )  $\delta$  173.7, 158.6, 157.8, 84.0, 74.3, 69.7, 61.6, 52.8, 44.0, 43.9, 22.8. HR-MS (APCI)  $m/z$  340.0900;  $[\text{M}+\text{H}]^+$  requires 340.0912.

*O*-(2-Acetamido-2-deoxy-D-glucopyranosylidene)amino *N,N*-(dimethyl) carbamate **59**  
Using **29** and flash chromatography (MeOH/EtOAc 1:3) of the resultant residue gave a colourless oil which was treated with EtOAc to give **59** as a white solid (37 mg, 74%).  $R_f$  0.16 (MeOH/EtOAc 4:21).  $^1\text{H}$  NMR (600 MHz,  $\text{CD}_3\text{OD}$ )  $\delta$  4.58 (d,  $J = 9.8$  Hz, 1H), 3.93 (dd,  $J = 2.2, 12.3$  Hz, 1H), 3.90 (ddd,  $J = 2.2, 3.9, 9.2$  Hz, 1H), 3.85 (dd,  $J = 4.0, 12.3$  Hz, 1H), 3.76 (dd,  $J = 9.0, 9.0$  Hz, 1H), 3.69 (dd,  $J = 9.6, 9.6$  Hz, 1H), 2.96 (m, 6H), 2.04 (s, 3H).  $^{13}\text{C}$  NMR (151 MHz,  $\text{CD}_3\text{OD}$ )  $\delta$  173.8, 160.1, 157.1, 84.0, 74.8, 69.8, 61.7, 52.8, 36.9, 36.1, 22.8. HR-MS (APCI)  $m/z$  306.1301;  $[\text{M}+\text{H}]^+$  requires 306.1301.

*O*-(2-Acetamido-2-deoxy-D-glucopyranosylidene)amino *N,N*-(diethyl) carbamate **60**  
Using **30** and flash chromatography (MeOH/EtOAc 4:21) of the resultant residue gave a colourless oil which was treated with EtOAc to give **60** as a white solid (37 mg, 85%).  $R_f$  0.23 (MeOH/EtOAc 4:21).  $^1\text{H}$  NMR (600 MHz,  $\text{CD}_3\text{OD}$ )  $\delta$  4.59 (d,  $J = 9.9$  Hz, 1H), 3.93-3.83 (m, 3H), 3.77 (dd,  $J = 8.9, 8.9$  Hz, 1H), 3.69 (dd,  $J = 9.6, 9.6$  Hz, 1H), 3.41-3.32 (m, 4H), 2.04 (s, 3H), 1.17 (br s, 6H).  $^{13}\text{C}$  NMR (151 MHz,  $\text{CD}_3\text{OD}$ )  $\delta$  173.8, 160.2, 156.5, 84.0, 74.8, 69.8, 61.7, 52.8, 43.5, 42.9, 22.8, 14.3, 13.7. HR-MS (APCI)  $m/z$  334.1619;  $[\text{M}+\text{H}]^+$  requires 334.1614.

*O*-(2-Acetamido-2-deoxy-D-glucopyranosylidene)amino *N,N*-(dibutyl) carbamate **61**  
Using **31** and flash chromatography (MeOH/EtOAc 3:17) of the resultant residue gave a colourless oil which was treated with EtOAc to give **61** as a white solid (38 mg, 79%).  $R_f$  0.22 (MeOH/EtOAc 7:43).  $^1\text{H}$  NMR (600 MHz,  $\text{CD}_3\text{OD}$ )  $\delta$  4.59 (d,  $J = 10.0$  Hz, 1H), 4.02-3.84 (m, 3H), 3.80 (dd,  $J = 8.8, 8.8$  Hz, 1H), 3.69 (dd,  $J = 9.4, 9.4$  Hz, 1H), 3.29-3.13 (m, 2H), 2.04 (s, 3H), 1.62-1.49 (m, 4H), 1.41-1.23 (m, 4H), 0.95 (ap t,  $J = 7.3$  Hz, 6H).  $^{13}\text{C}$  NMR (151 MHz,  $\text{CD}_3\text{OD}$ )  $\delta$  173.8, 160.1, 156.9, 83.9, 74.8, 69.7, 61.6, 52.8, 48.1, 31.8, 31.2, 22.8, 21.0, 14.2. HR-MS (APCI)  $m/z$  390.2236;  $[\text{M}+\text{H}]^+$  requires 390.2240.

*O*-(2-Acetamido-2-deoxy-D-glucopyranosylidene)amino *N,N*-(pentylene) carbamate  
**62**

Using **32** and flash chromatography (MeOH/EtOAc 1:4) of the resultant residue gave a colourless oil which was treated with EtOAc to give **62** as a white solid (45 mg, 72%).  $R_f$  0.21 (MeOH/EtOAc 1:4).  $^1\text{H}$  NMR (600 MHz,  $\text{D}_2\text{O}$ )  $\delta$  4.68 (d,  $J = 8.8$  Hz, 1H), 4.10-4.07 (m, 1H), 4.05-3.98 (m, 1H), 3.95-3.84 (m, 3H), 3.57-3.42 (m, 4H), 2.12 (s, 3H), 1.70-1.44 (m, 6H).  $^{13}\text{C}$  NMR (151 MHz,  $\text{D}_2\text{O}$ )  $\delta$  175.1, 159.9, 155.8, 82.5, 72.8, 68.4, 60.5, 51.8, 46.0, 25.8, 24.1, 22.7. HR-MS (APCI)  $m/z$  346.1625;  $[\text{M}+\text{H}]^+$  requires 346.1614.

*O*-(2-Acetamido-2-deoxy-D-glucopyranosylidene)amino *N,N*-(ethyleneoxyethylene) carbamate **63**

Using **33** and flash chromatography (MeOH/EtOAc 3:17) of the resultant residue gave a colourless oil which was treated with EtOAc to give **63** as a white solid (20 mg, 42%).  $R_f$  0.25 (MeOH/EtOAc 1:4).  $^1\text{H}$  NMR (600 MHz,  $\text{D}_2\text{O}$ )  $\delta$  4.68 (d,  $J = 9.6$  Hz, 1H), 4.10 (ddd,  $J = 2.2, 4.3, 9.4$  Hz, 1H), 4.02 (dd,  $J = 2.3, 13.0$  Hz, 1H), 3.95-3.84 (m, 3H), 3.77 (br s, 4H), 3.57 (br s, 4H), 2.12 (s, 3H).  $^{13}\text{C}$  NMR (151 MHz,  $\text{D}_2\text{O}$ )  $\delta$  175.2, 160.2, 155.6, 82.6, 72.7, 68.3, 66.7, 60.5, 51.8, 44.6, 22.7. HR-MS (APCI)  $m/z$  348.1396;  $[\text{M}+\text{H}]^+$  requires 348.1407.

### *Kinetic Analysis of Inhibitors*

Assays against  $\beta$ -hexosaminidase B and NAGLU were carried out in triplicate at 37 °C for 30 minutes using a stopped assay procedure in which the enzymatic reactions were quenched by the addition of a 4-fold excess of quenching buffer (200 mM glycine, pH 10.75). Assays against OGA were carried out in triplicate at 37°C for 20 minutes using a continuous assay procedure where reactions were initiated by the addition of substrate. Assays against  $\beta$ -hexosaminidase B were conducted in buffer (50 mM citrate, 100 mM NaCl, pH 4.25) and OGA (PBS, pH 7.4 buffer, 0.03% BSA) using 4-methylumbelliferyl *N*-acetyl- $\beta$ -D-glucosaminide as substrate. For NAGLU, assays were performed in acetate buffer (100 mM, pH 4.3), containing bovine serum albumin (0.5 mg  $\text{ml}^{-1}$ ) using 4-methylumbelliferyl *N*-acetyl- $\alpha$ -D-glucosaminide as substrate. For  $\beta$ -hexosaminidase B and NAGLU assays, release of 4-methylumbelliferone was monitored using a Varian CARY Eclipse Fluorescence Spectrophotometer 96-well plate system with readings taken at excitation and



emission wavelengths of 368 nm and 450 nm respectively, with 5 mm slit openings. For OGA the extent of 4-methylumbelliferone release was determined using a BioTek Synergy Plate Reader at excitation and emission wavelengths of 350 and 445 nm respectively. Assays contained substrate at the previously determined  $K_m$  value of the substrate for the enzyme, and the enzyme was at a concentration of 0.5-10 nM for  $\beta$ -hexosaminidase B, 10-100 nM for NAGLU and 10 nM for OGA. For  $K_I$  analysis, inhibitors were tested at a range of concentrations that encompassed their  $K_I$  values. The rates at each inhibitor concentration were plotted and a best fit line through the points was ascertained. The  $-1/K_I$  was taken as the point where the line of best fit intersected with  $1/V_{max}$ .

## References

1. G. R. Fulmer, A. J. M. Miller, N. H. Sherden, H. E. Gottlieb, A. Nudelman, B. M. Stoltz, J. E. Bercaw and K. I. Goldberg, *Organometallics* 2010, **29**, 2176-2179.
2. D. Beer, J. L. Maloisel, D. M. Rast and A. Vasella, *Helv. Chim. Acta*, 1990, **73**, 1918-1922.
3. B. Gómez-Reyes and A. K. Yatsimirsky, *Org. Biomol. Chem.*, 2003, **1**, 866-872.
4. P. Yang and R. M., *J. Am. Chem. Soc.*, 1931, **53**, 3183-3184.
5. E. L. Smith and D. H. Spackman, *J. Biol. Chem.*, 1955, **212**, 271-299.
6. K. Blau and S. Waley, *Biochem J.*, 1954, **57**, 538-541.
7. H. Zeng, X. Yang, R. A. Flowers and B. Gong, *J. Am. Chem. Soc.*, 2002, **124**, 2903-2910.
8. D. Beer and A. Vasella, *Helv. Chim. Acta*, 1985, **68**, 2254-2274.

# $^1\text{H}$ NMR spectrum of **1**

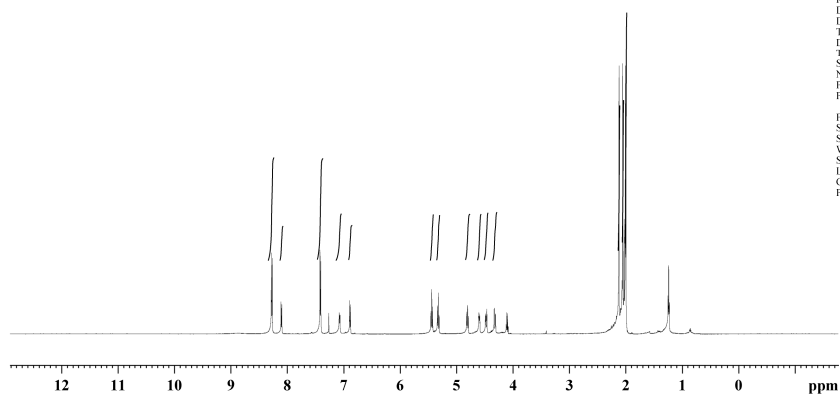

Current Data Parameters  
NAME mlrat-papcarbonate  
EXPNO 2  
PROCNO 1

F2 - Acquisition Parameters  
Date\_ 20110914  
Time 14:47  
INSTRUM spect  
PROBHD 5 mm TBO-BB-1H  
PULPROG zg  
TD 65536  
SOLVENT CDCl3  
NS 4  
DS 4  
SWH 8992.806 Hz  
FIDRES 0.137219 Hz  
AQ 3.6438017 sec  
RG 128  
DW 55.600 usec  
DE 7.00 usec  
TE 298.0 K  
D1 5.00000000 sec  
TD0 1  
SFO1 600.132688 MHz  
NUC1 1H  
PI 5.00 usec  
PLW1 -1.00000000 W

F2 - Processing parameters  
SI 65536  
SF 600.1300160 MHz  
WDW EM  
SSB 0  
LB 0.20 Hz  
GB 0  
PC 0.50

# $^{13}\text{C}$ NMR spectrum of **1**

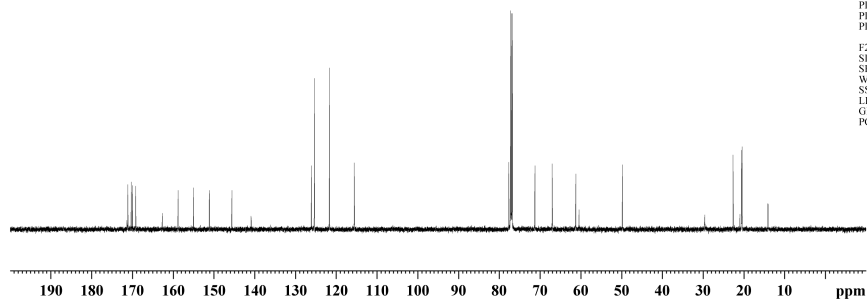

Current Data Parameters  
NAME mlrat-papcarbonate  
EXPNO 3  
PROCNO 1

F2 - Acquisition Parameters  
Date\_ 20110914  
Time 14:43  
INSTRUM spect  
PROBHD 5 mm TBO-BB-1H  
PULPROG zgpg  
TD 65536  
SOLVENT CDCl3  
NS 200  
DS 4  
SWH 37593.984 Hz  
FIDRES 0.573639 Hz  
AQ 0.8716288 sec  
RG 9195.2  
DW 15.300 usec  
DE 7.00 usec  
TE 298.0 K  
D1 2.00000000 sec  
d11 0.03000000 sec  
DELTA 1.89999998 sec  
TD0 1  
SFO1 150.9178081 MHz  
NUC1 13C  
PI 3.00 usec  
PLW1 -1.00000000 W  
SFO2 600.1324500 MHz  
NUC2 1H  
CPDPRG2 waltz16  
PCPD2 100.00 usec  
PLW2 -1.00000000 W  
PLW12 -1.00000000 W  
PLW13 -1.00000000 W

F2 - Processing parameters  
SI 65536  
SF 150.9028207 MHz  
WDW EM  
SSB 0  
LB 1.00 Hz  
GB 0  
PC 1.00

# $^1\text{H}$ NMR spectrum of **4**

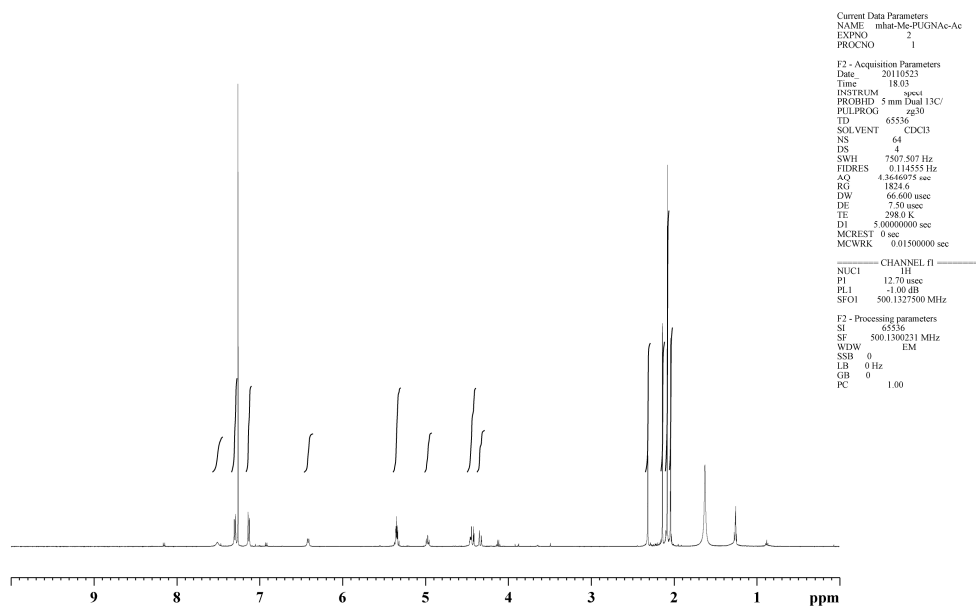

# $^{13}\text{C}$ NMR spectrum of **4**

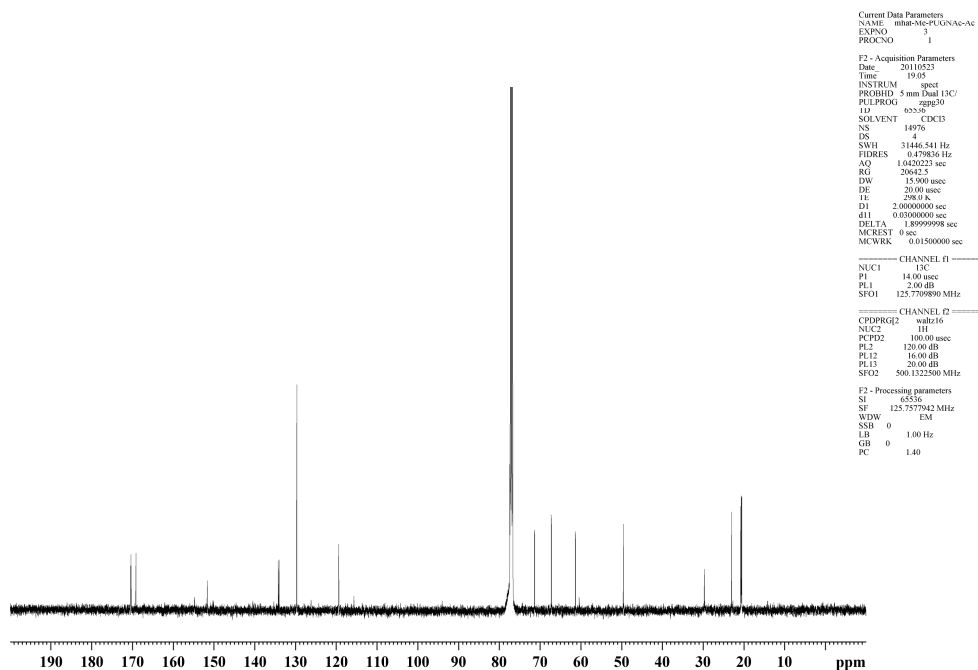

# $^1\text{H}$ NMR spectrum of **5**

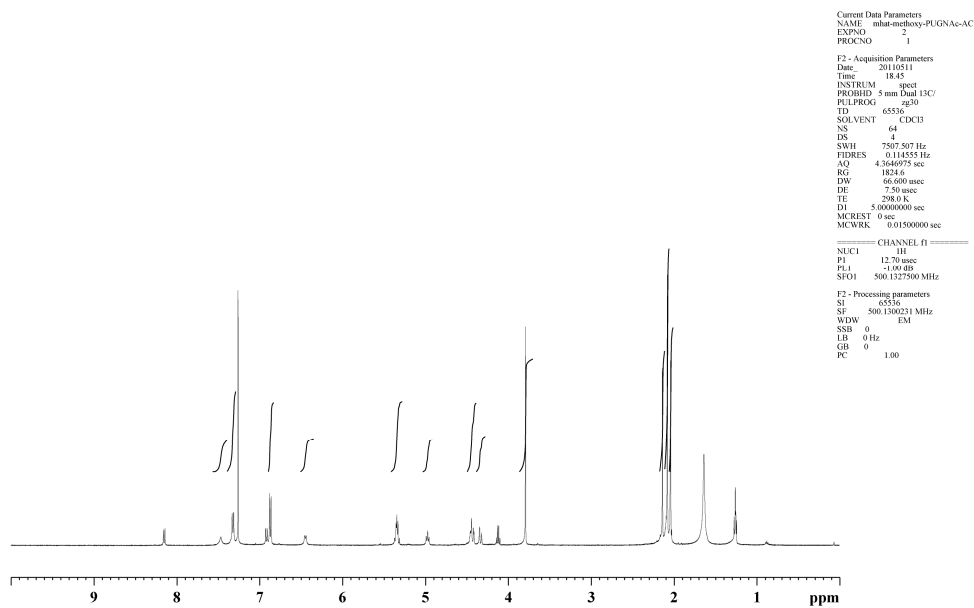

# $^{13}\text{C}$ NMR spectrum of **5**

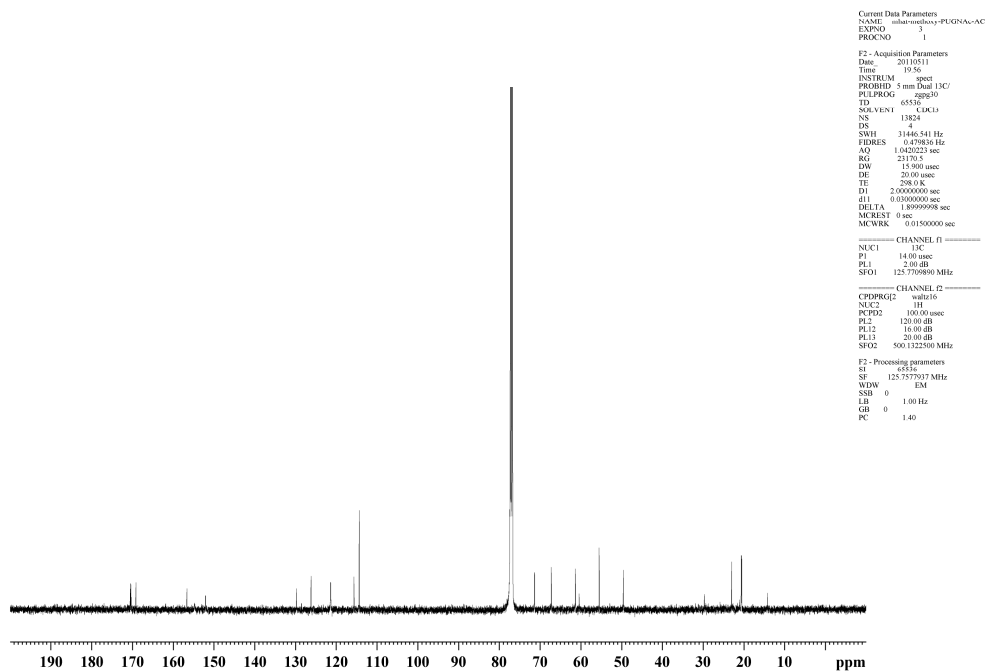

# <sup>1</sup>H NMR spectrum of **6**

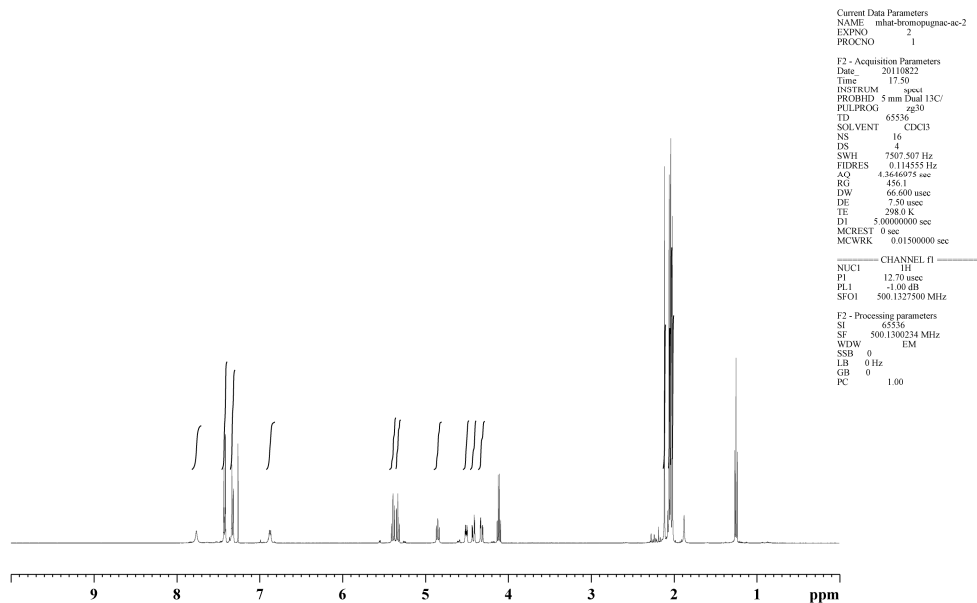

# <sup>13</sup>C NMR spectrum of **6**

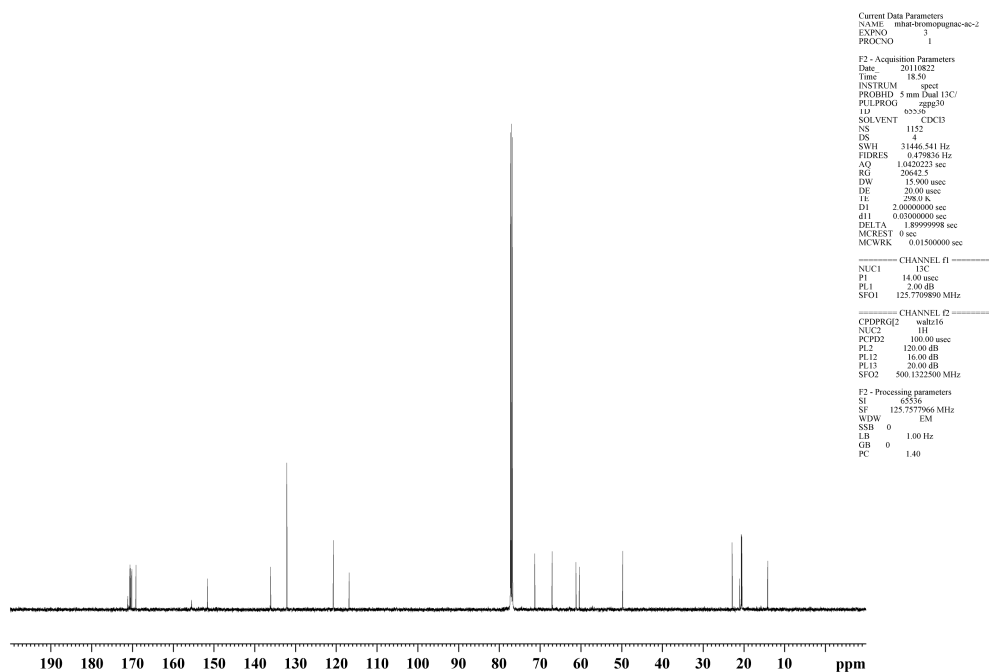

# $^1\text{H}$ NMR spectrum of **7**

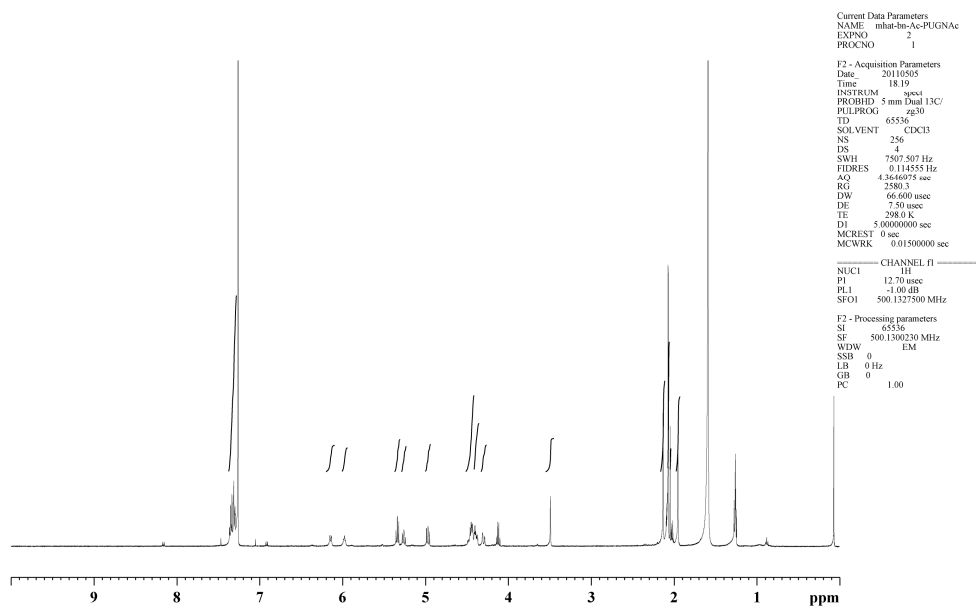

# $^{13}\text{C}$ NMR spectrum of **7**

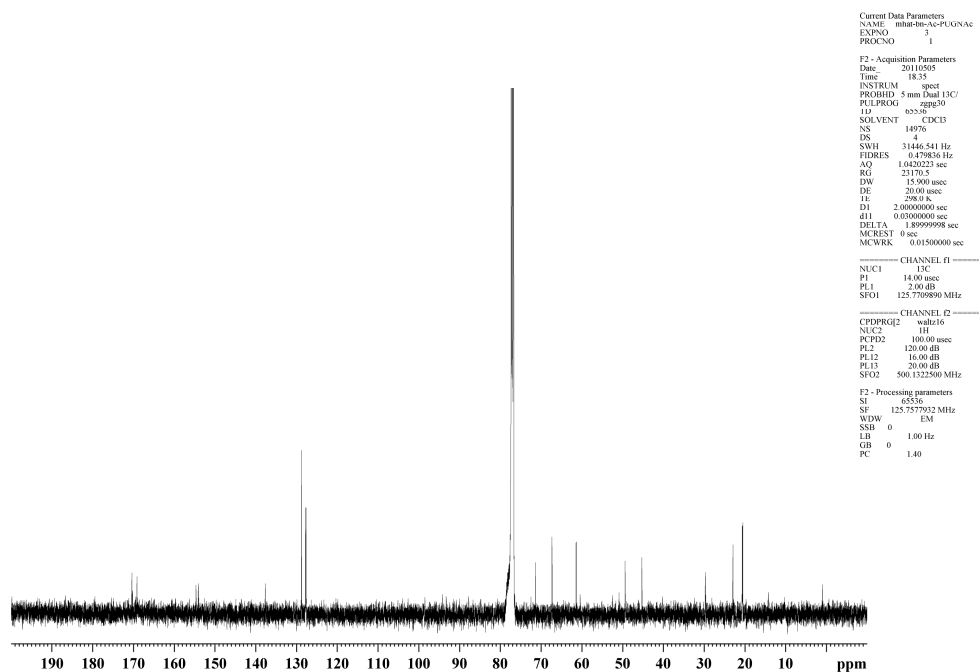

# <sup>1</sup>H NMR spectrum of **8**

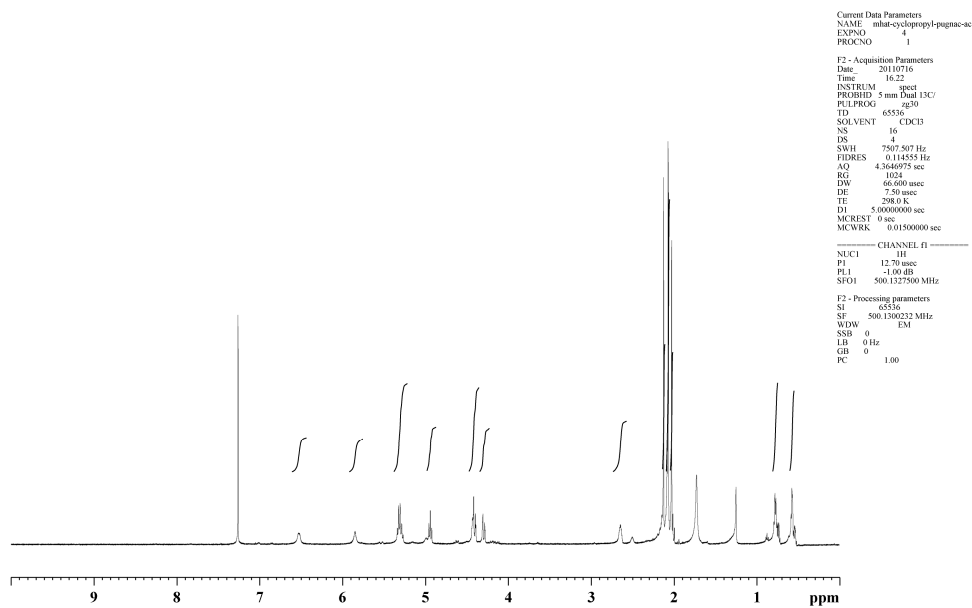

# <sup>13</sup>C NMR spectrum of **8**

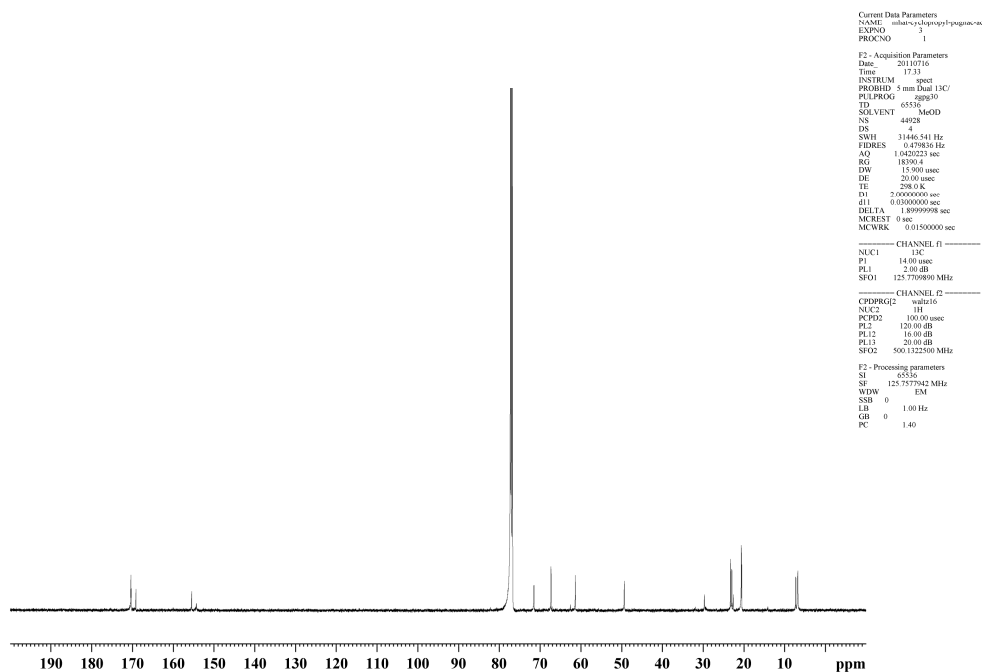

# $^1\text{H}$ NMR spectrum of **9**

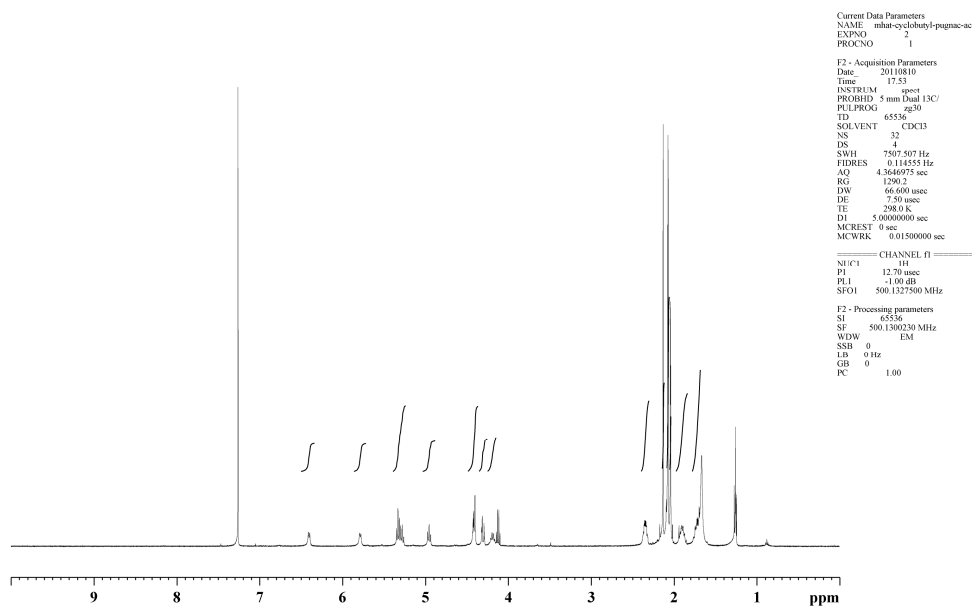

# $^{13}\text{C}$ NMR spectrum of **9**

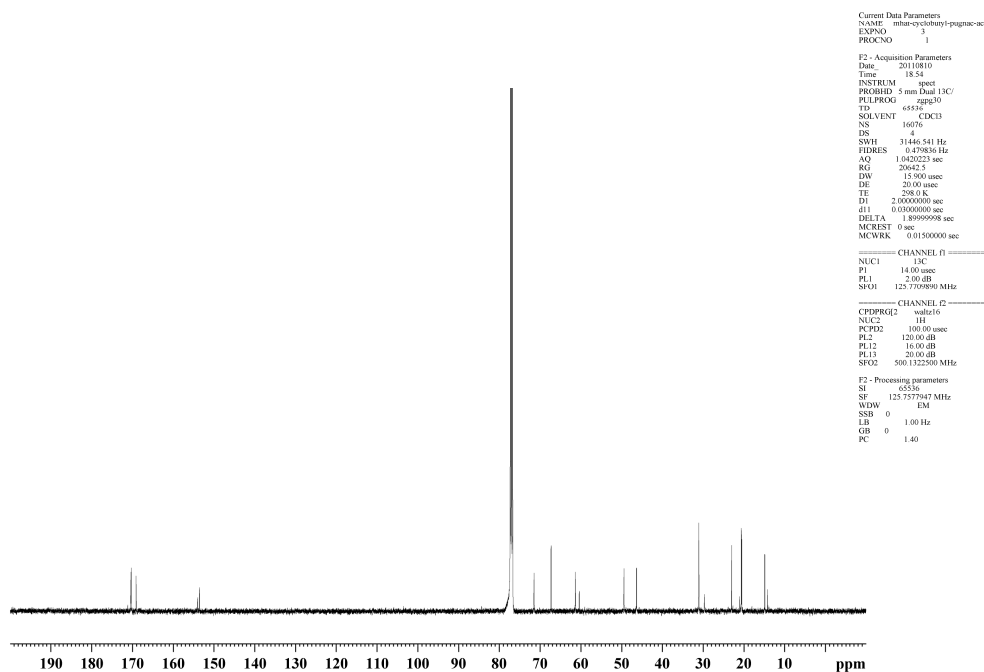



# $^1\text{H}$ NMR spectrum of **10**

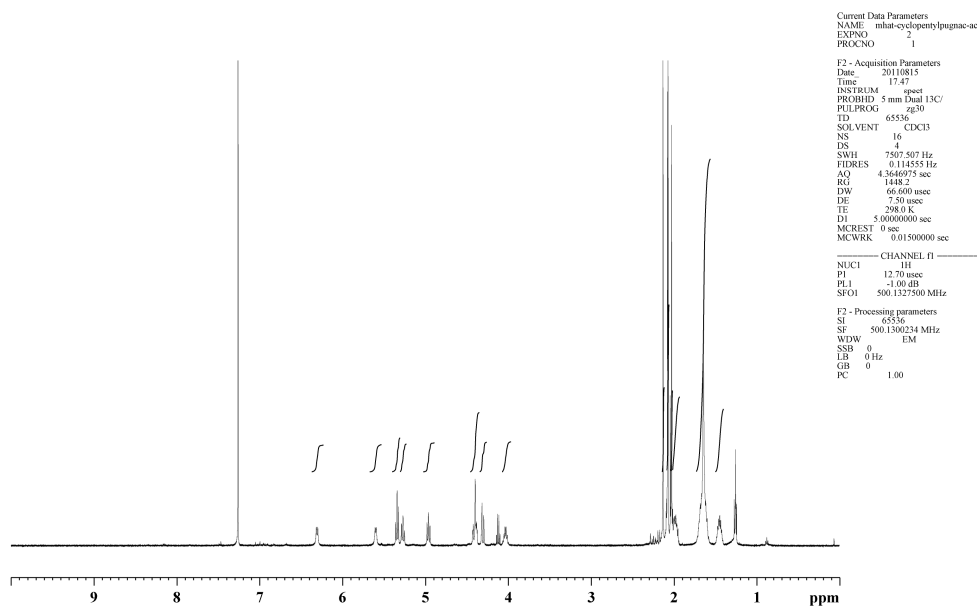

# $^{13}\text{C}$ NMR spectrum of **10**

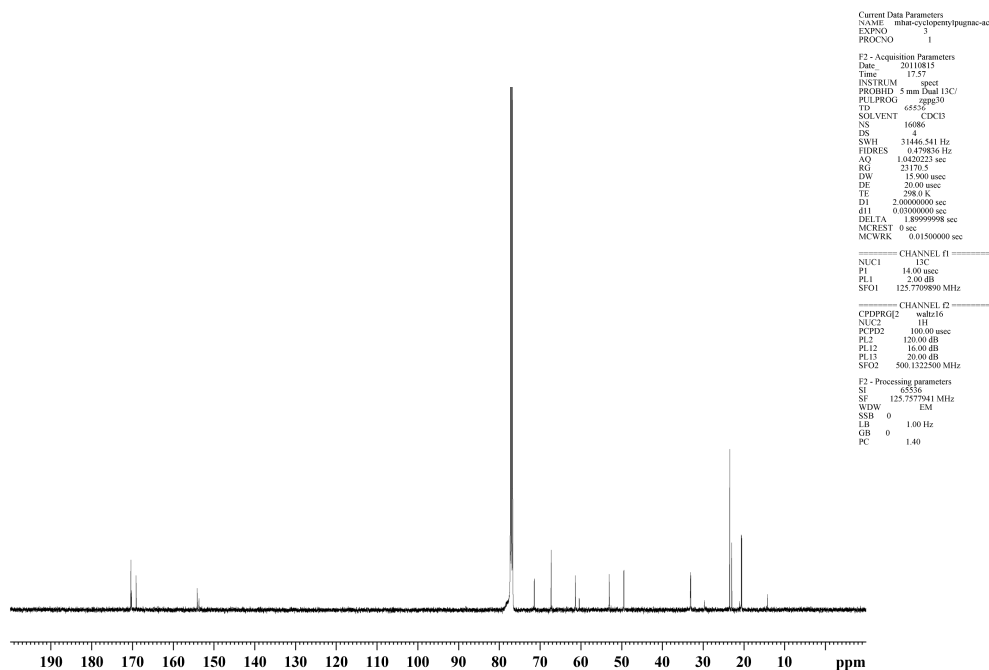

# $^1\text{H}$ NMR spectrum of **11**

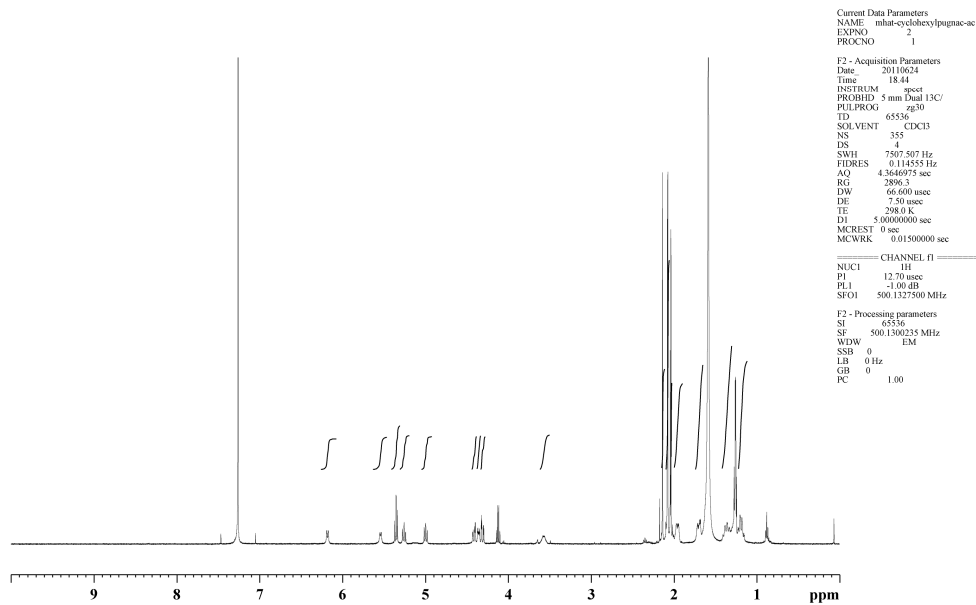

# $^{13}\text{C}$ NMR spectrum of **11**

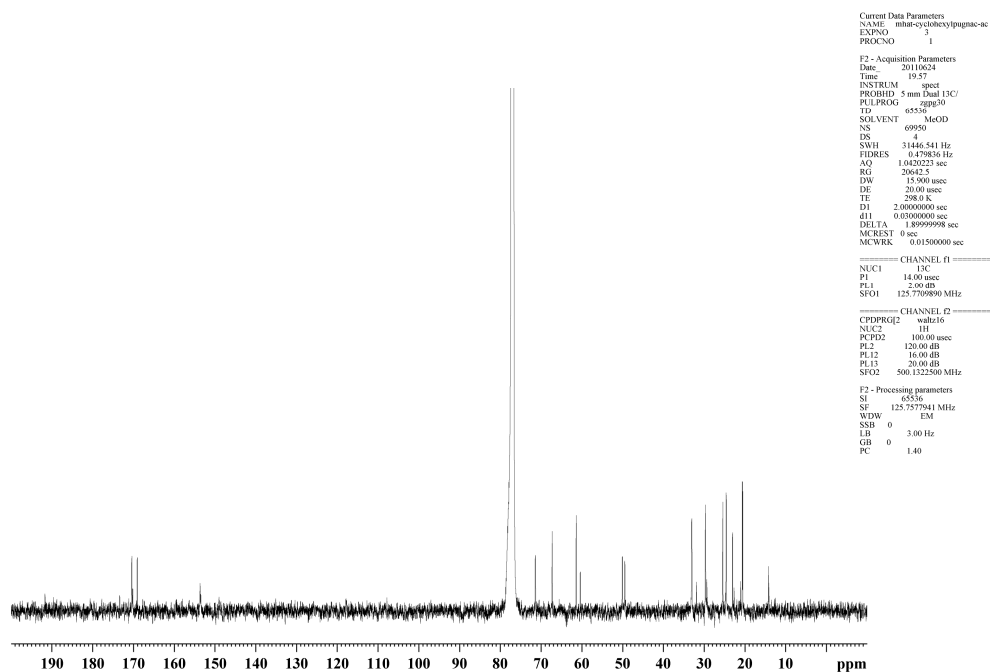

# <sup>1</sup>H NMR spectrum of **12**

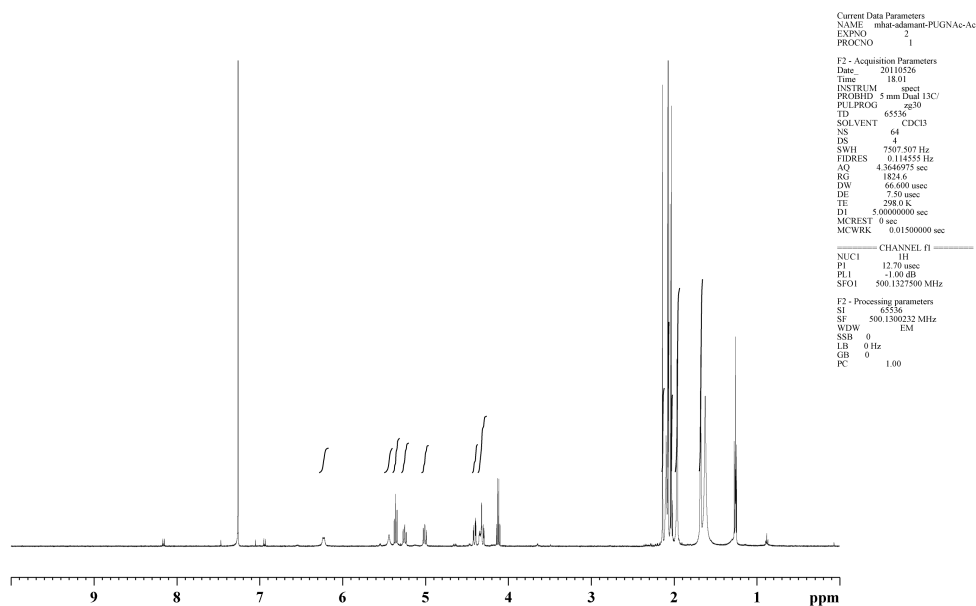

# <sup>13</sup>C NMR spectrum of **12**

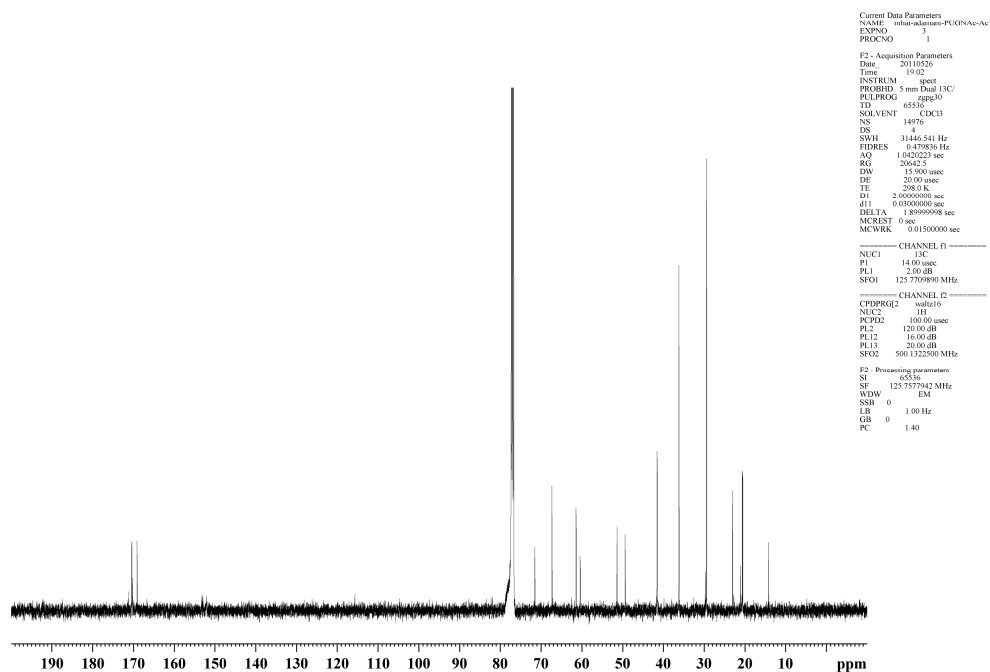

# <sup>1</sup>H NMR spectrum of **13**

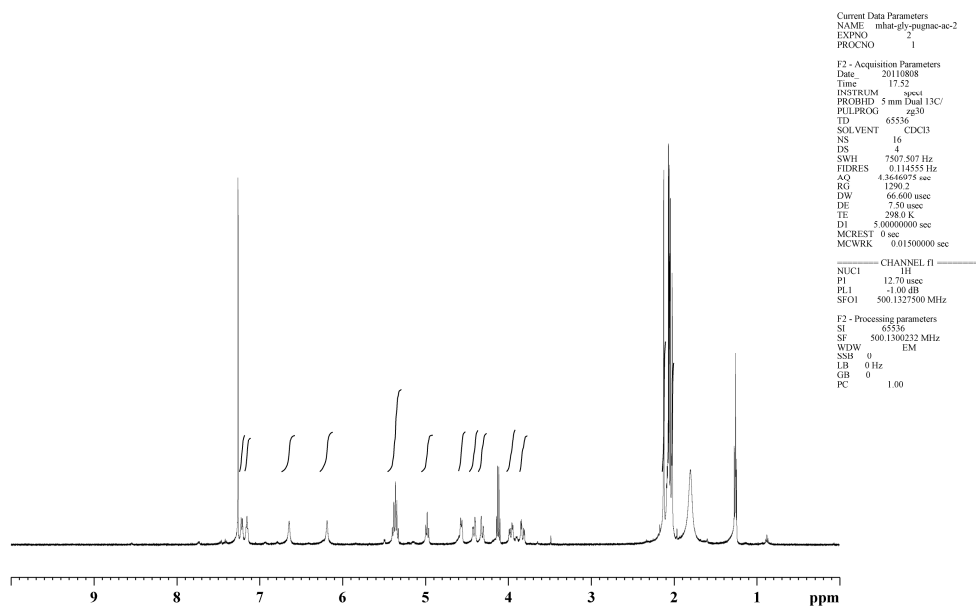

# <sup>13</sup>C NMR spectrum of **13**

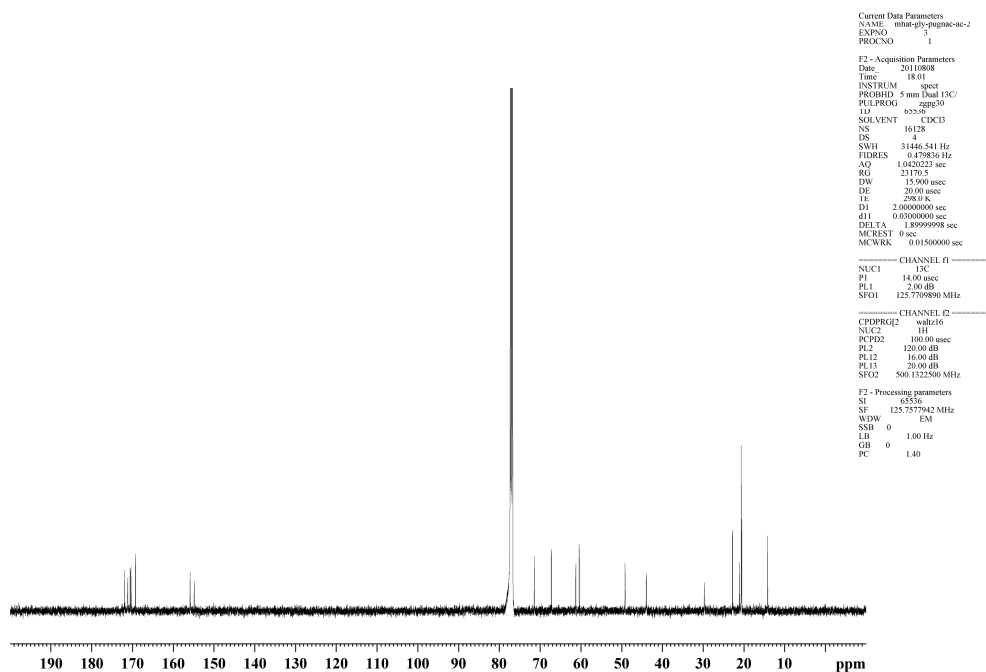

# $^1\text{H}$ NMR spectrum of **14**

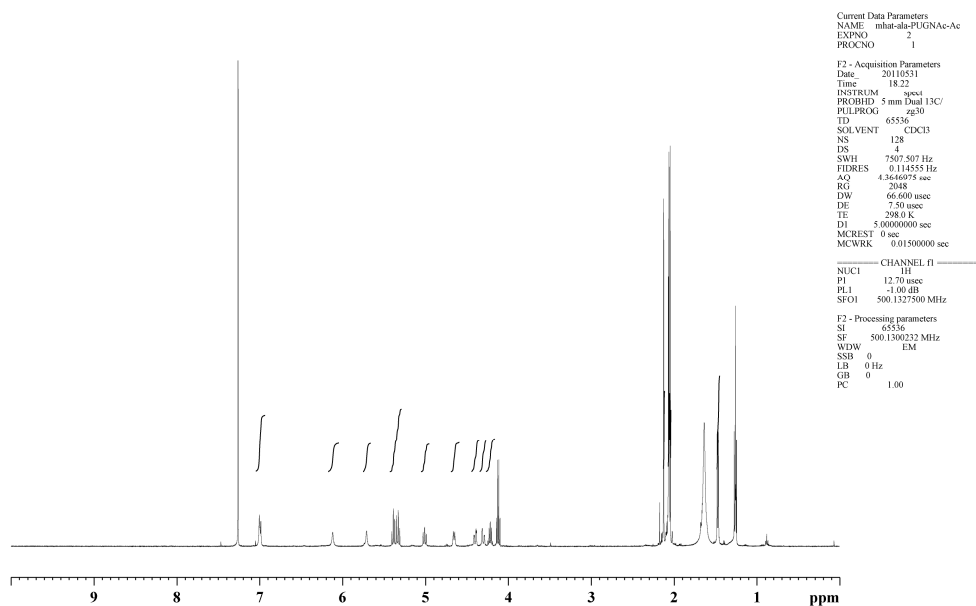

# $^{13}\text{C}$ NMR spectrum of **14**

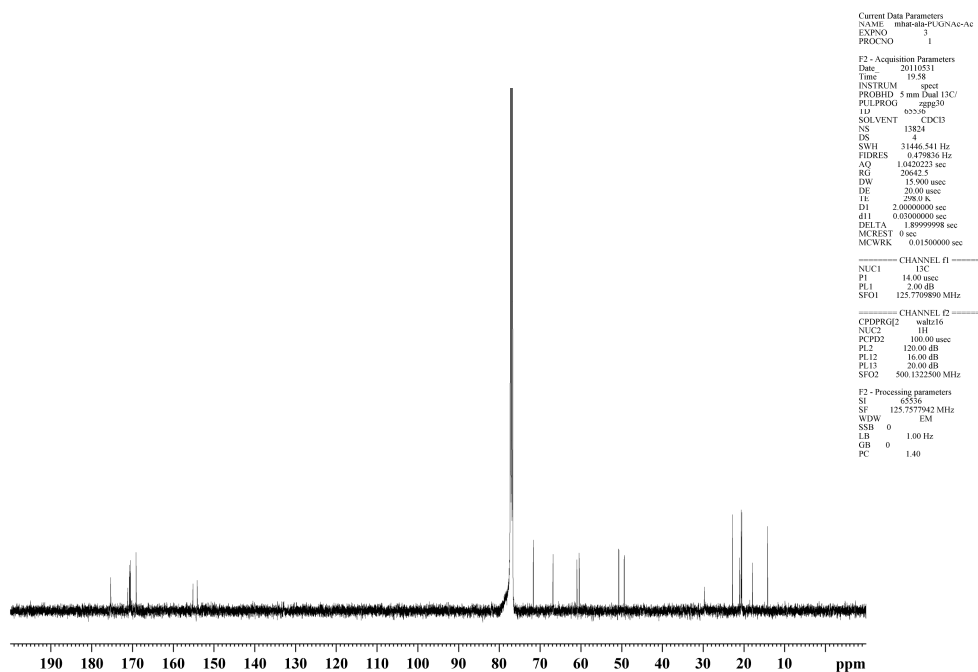

# $^1\text{H}$ NMR spectrum of **15**

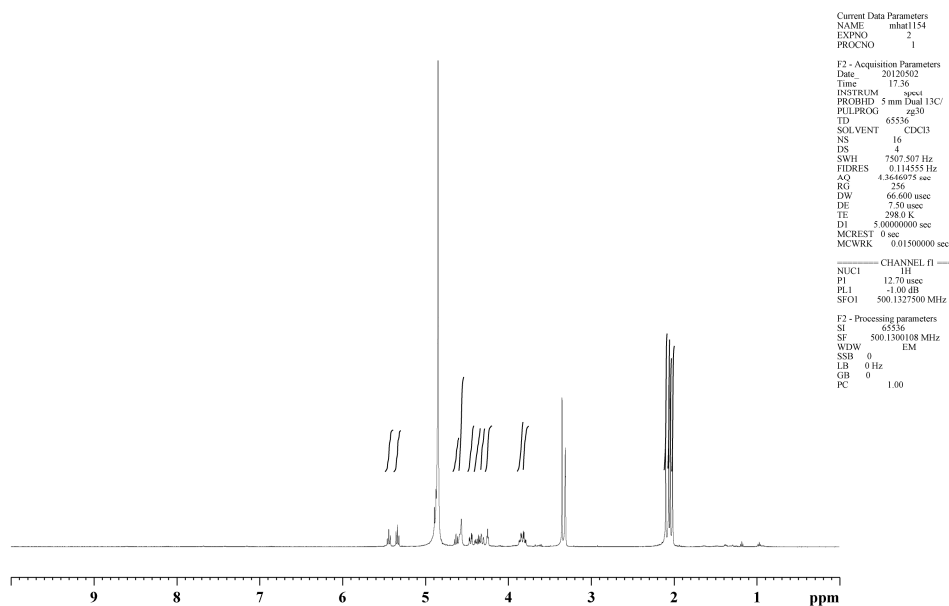

# $^{13}\text{C}$ NMR spectrum of **15**

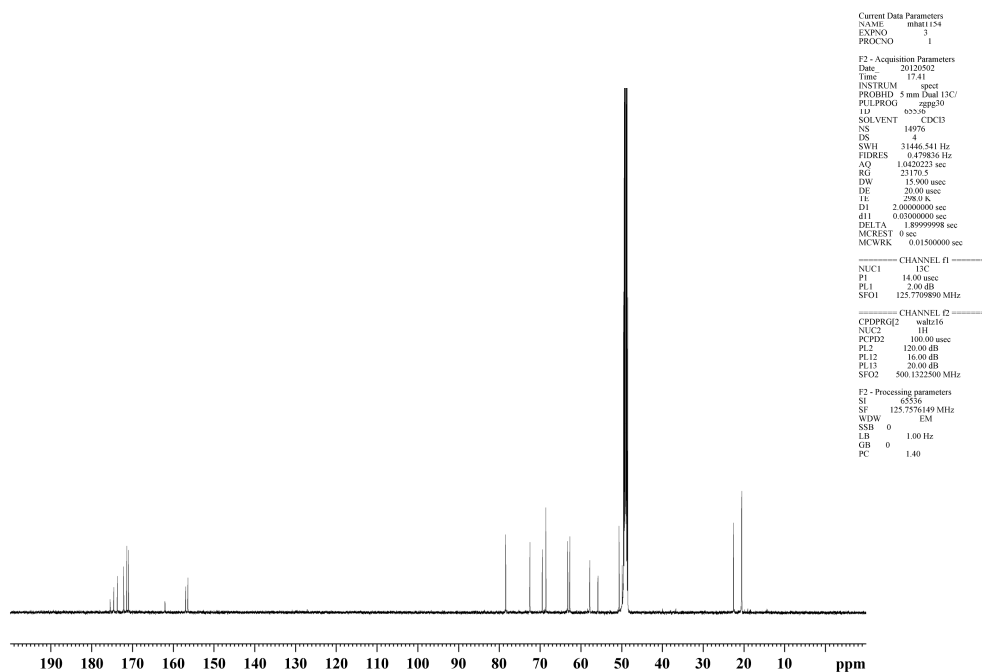

# $^1\text{H}$ NMR spectrum of **16**

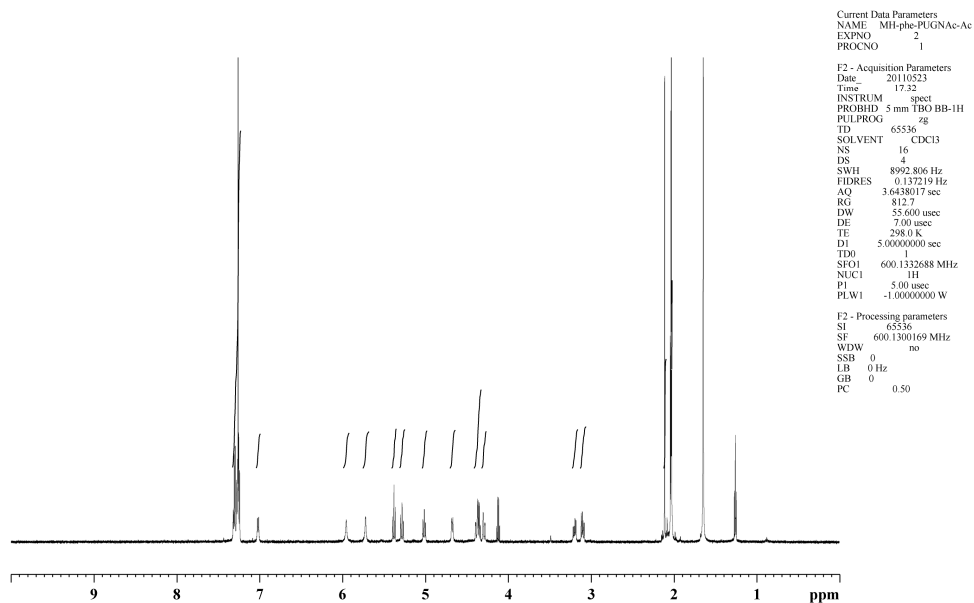

# $^{13}\text{C}$ NMR spectrum of **16**

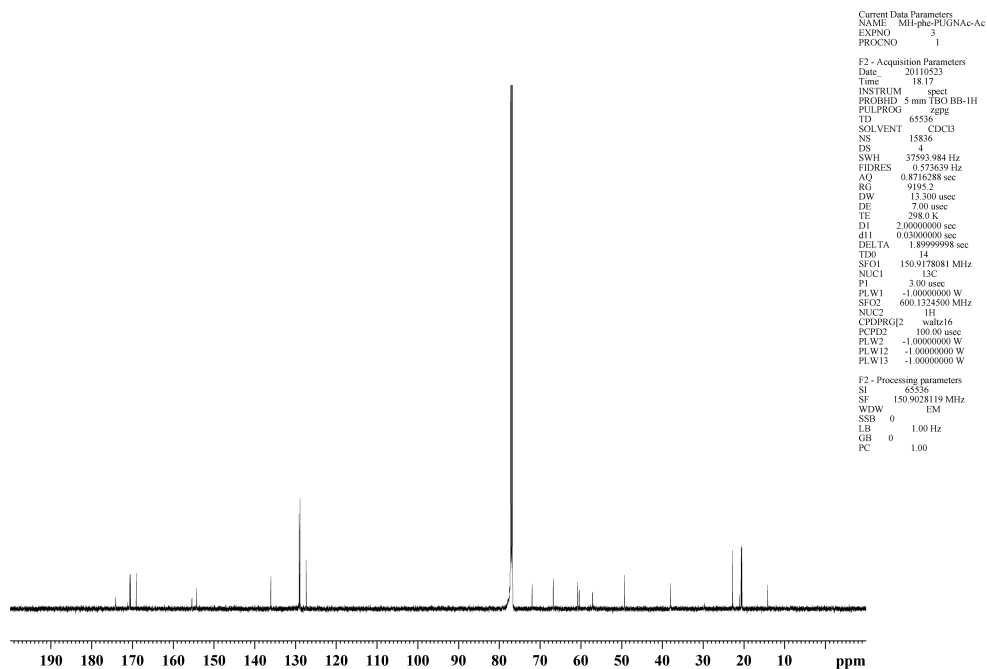

# $^1\text{H}$ NMR spectrum of **17**

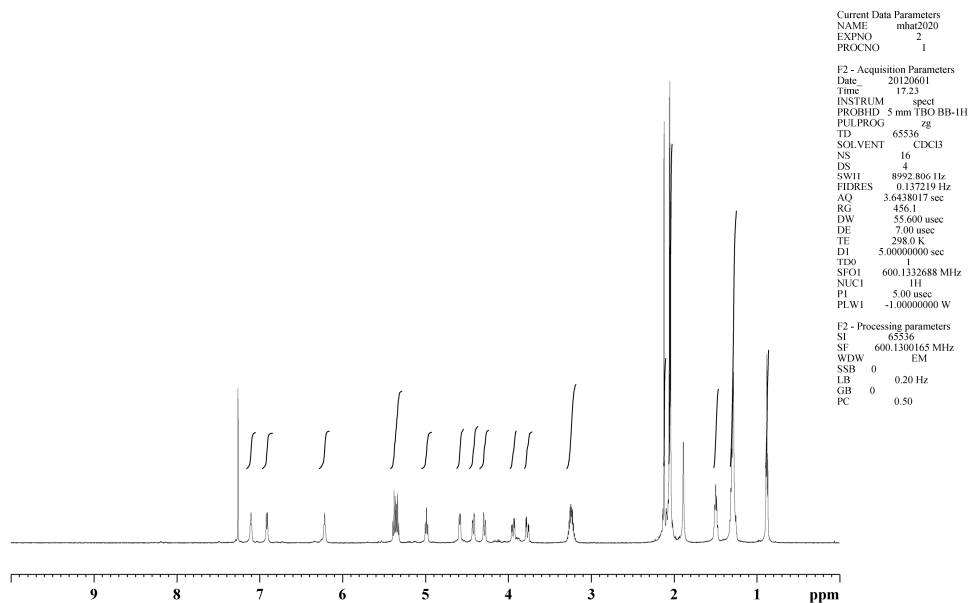

# $^{13}\text{C}$ NMR spectrum of **17**

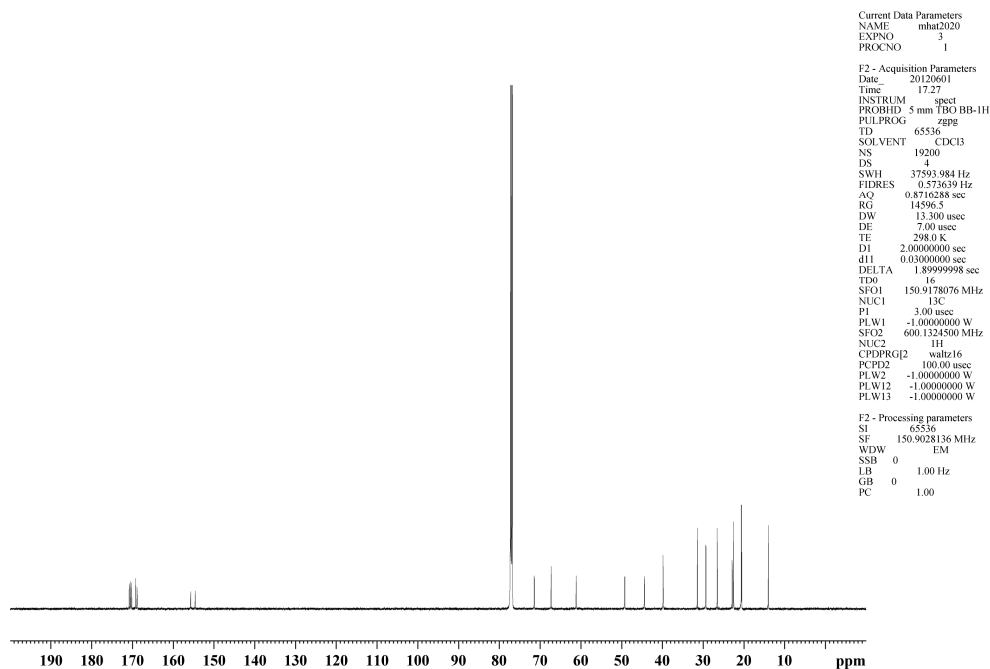



# $^1\text{H}$ NMR spectrum of **19**

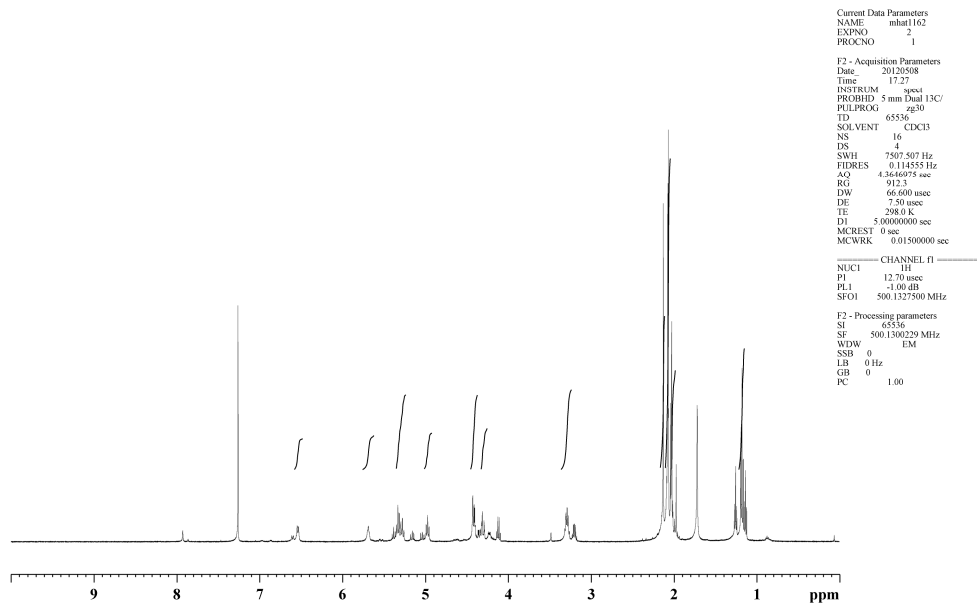

# $^{13}\text{C}$ NMR spectrum of **19**

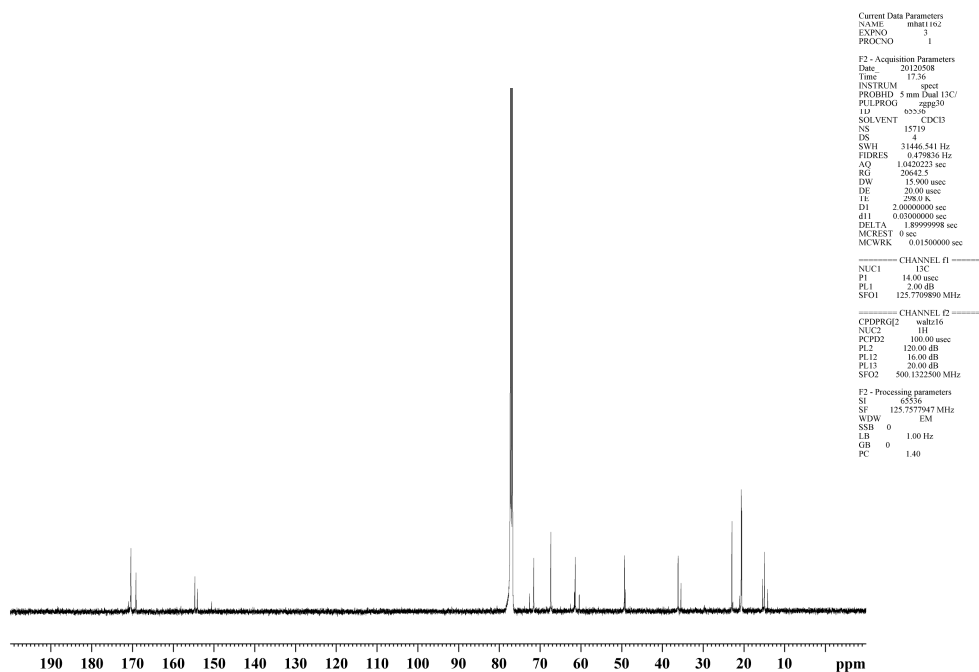

# $^1\text{H}$ NMR spectrum of **20**

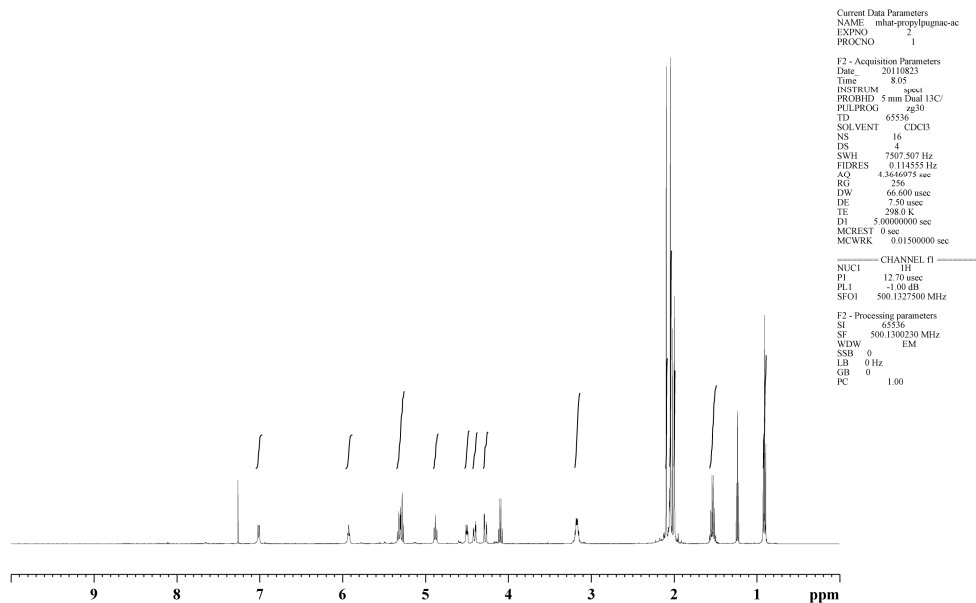

# $^{13}\text{C}$ NMR spectrum of **20**

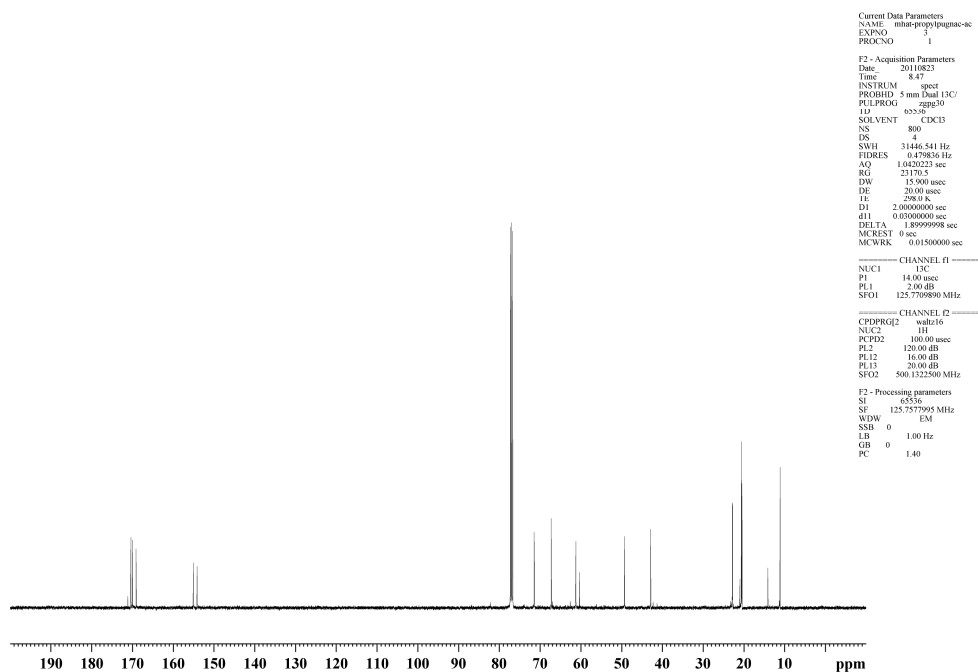

# $^1\text{H}$ NMR spectrum of **21**

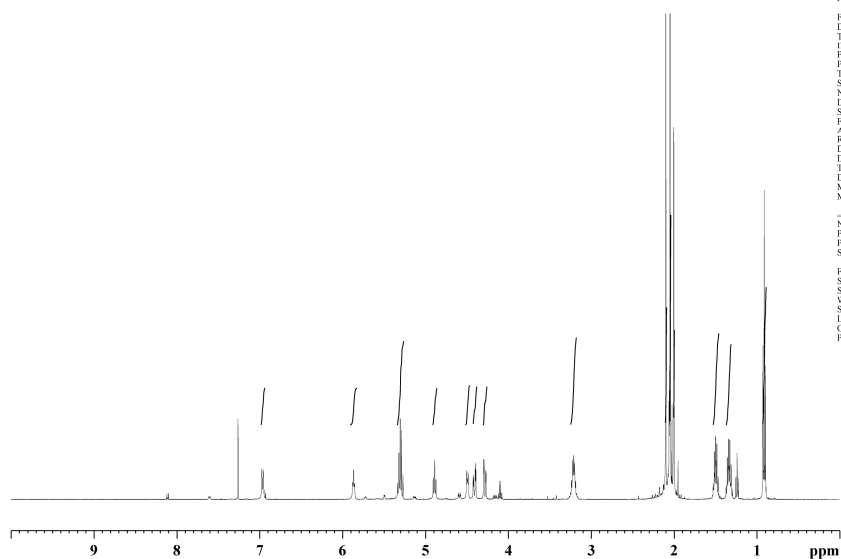

Current Data Parameters  
NAME mhat-nbu-pugnac-se  
EXPNO 2  
PROCNO 1

F2 - Acquisition Parameters  
Date\_ 20110824  
Time 7:49  
INSTRUM spect  
PROBHD 5 mm Dual 13C/  
PULPROG zg30  
TD 65536  
SOLVENT CDCl3  
NS 8  
DS 4  
SWH 7507.507 Hz  
FIDRES 0.114555 Hz  
AQ 4.3646678 sec  
RG 256  
DW 66.660 usec  
DE 7.50 usec  
TE 298.0 K  
D1 5.0000000 sec  
MCREST 0 sec  
MCWRR 0.0150000 sec

----- CHANNEL f1 -----  
NUC1  $^1\text{H}$   
P1 12.70 usec  
PL1 -1.00 dB  
SFO1 500.1327500 MHz

F2 - Processing parameters  
SI 65536  
SF 500.1300232 MHz  
WDW EM  
SSB 0  
LB 0 Hz  
GB 0  
PC 1.00

# $^{13}\text{C}$ NMR spectrum of **21**

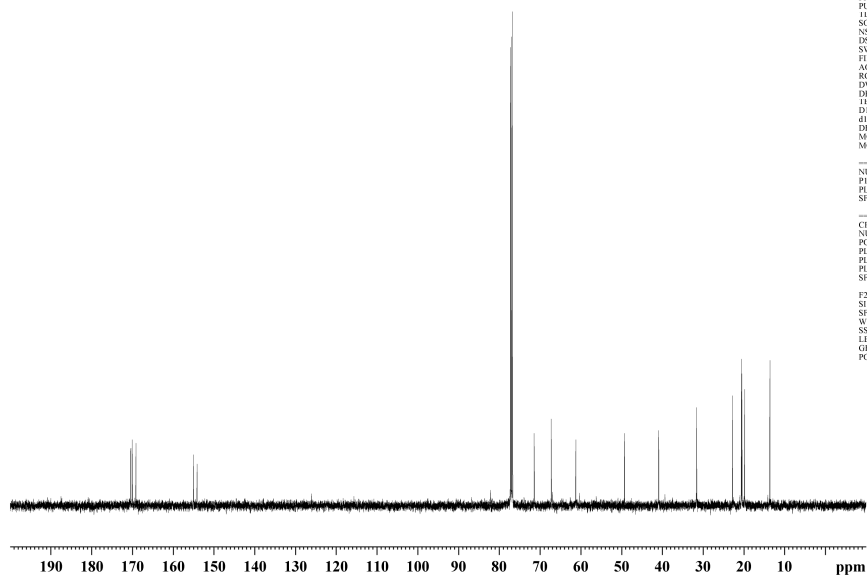

Current Data Parameters  
NAME mhat-nbu-pugnac-se  
EXPNO 2  
PROCNO 1

F2 - Acquisition Parameters  
Date\_ 20110824  
Time 7:56  
INSTRUM spect  
PROBHD 5 mm Dual 13C/  
PULPROG zgpg30  
TD 65536  
SOLVENT CDCl3  
NS 4  
DS 4  
SWH 31446.541 Hz  
FIDRES 0.478836 Hz  
AQ 1.0620221 sec  
RG 18390.4  
DW 15.900 usec  
DE 20.00 usec  
TE 298.0 K  
D1 2.0000000 sec  
d11 0.0300000 sec  
DELTA 1.8999998 sec  
MCREST 0 sec  
MCWRR 0.0150000 sec

----- CHANNEL f1 -----  
NUC1  $^{13}\text{C}$   
P1 14.00 usec  
PL1 2.00 dB  
SFO1 125.7708090 MHz

----- CHANNEL f2 -----  
CPDPRG2 waltz16  
NUC2  $^1\text{H}$   
PCPD2 100.00 usec  
PL2 120.00 dB  
PL12 16.00 dB  
PL13 20.00 dB  
SFO2 500.1322500 MHz

F2 - Processing parameters  
SI 65536  
SF 125.7577990 MHz  
WDW EM  
SSB 0  
LB 1.00 Hz  
GB 0  
PC 1.40

# <sup>1</sup>H NMR spectrum of **22**

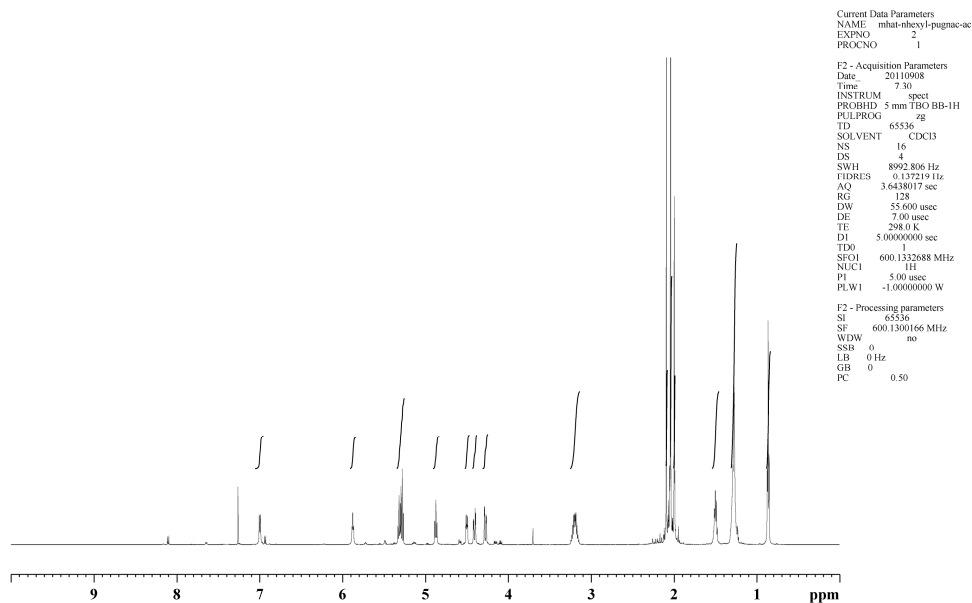

# <sup>13</sup>C NMR spectrum of **22**

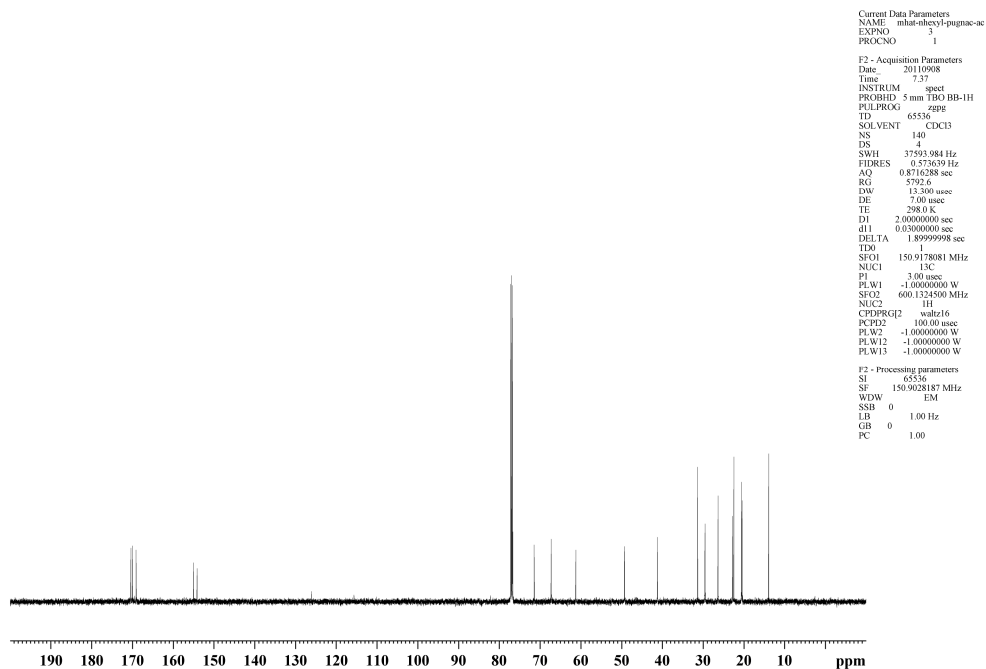

# $^1\text{H}$ NMR spectrum of **23**

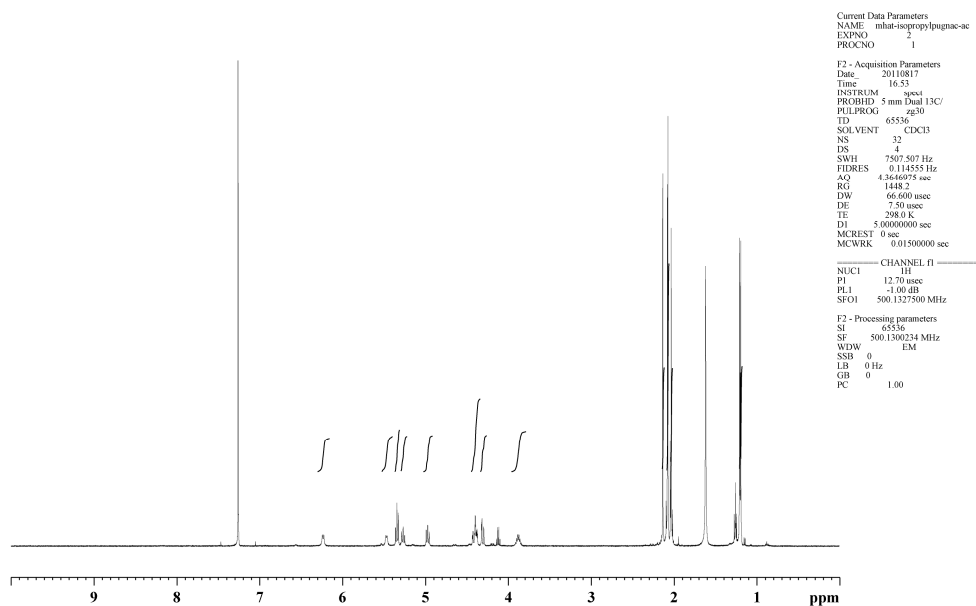

# $^{13}\text{C}$ NMR spectrum of **23**

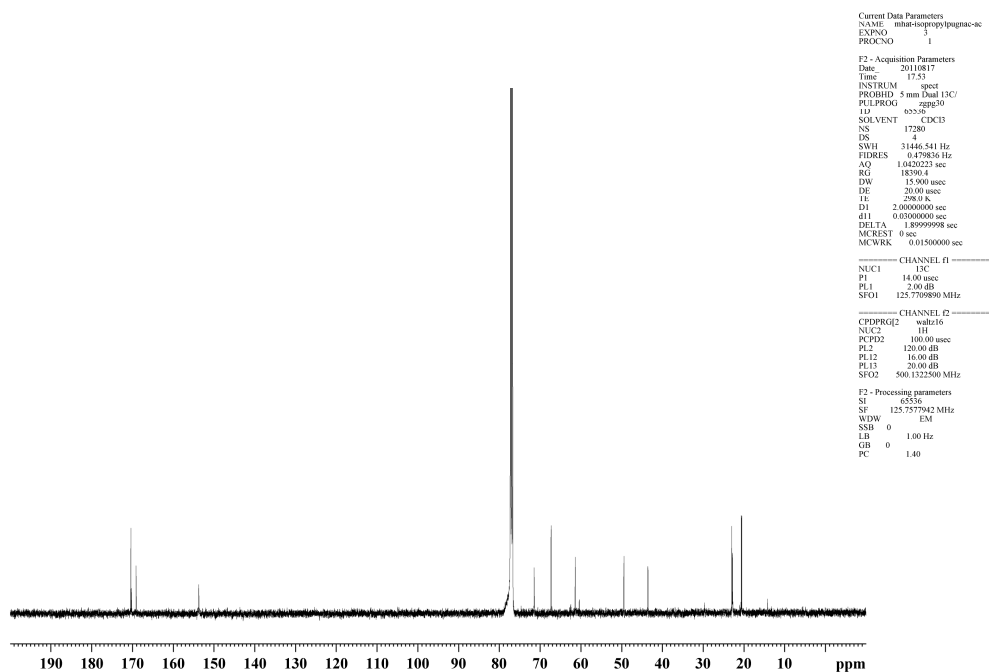

# $^1\text{H}$ NMR spectrum of **24**

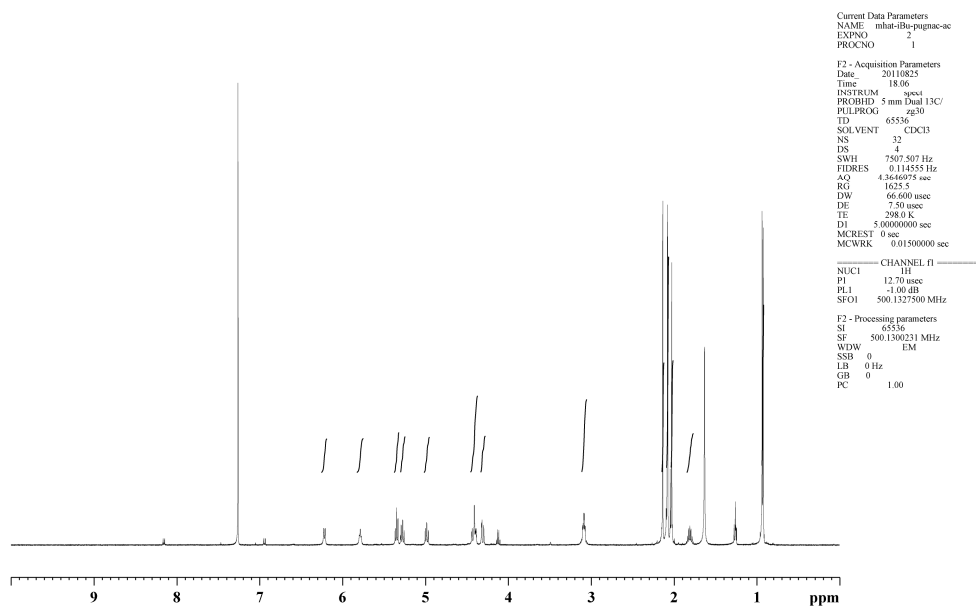

# $^{13}\text{C}$ NMR spectrum of **24**

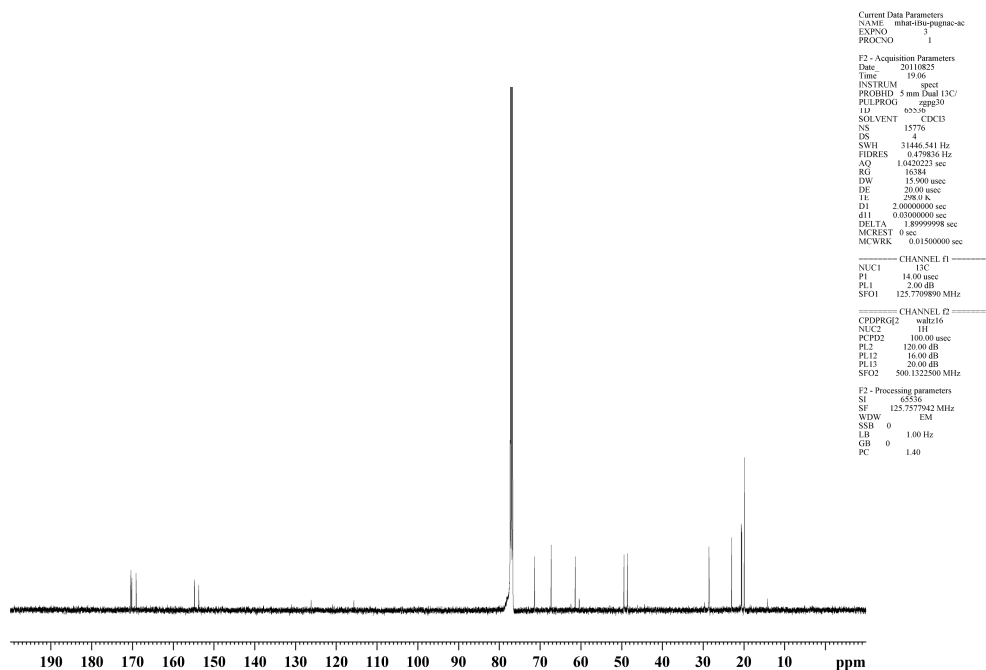

# $^1\text{H}$ NMR spectrum of **25**

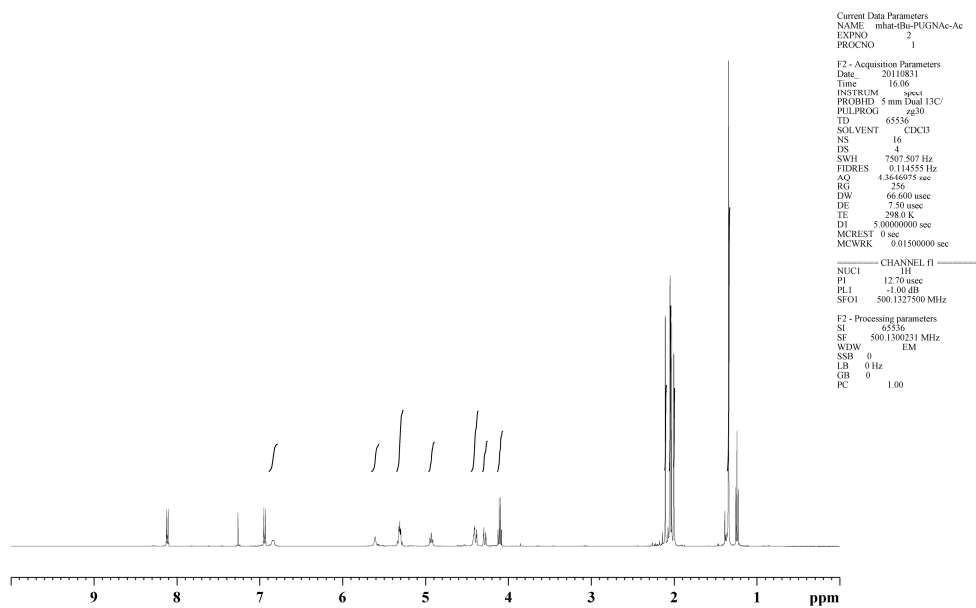

# $^{13}\text{C}$ NMR spectrum of **25**

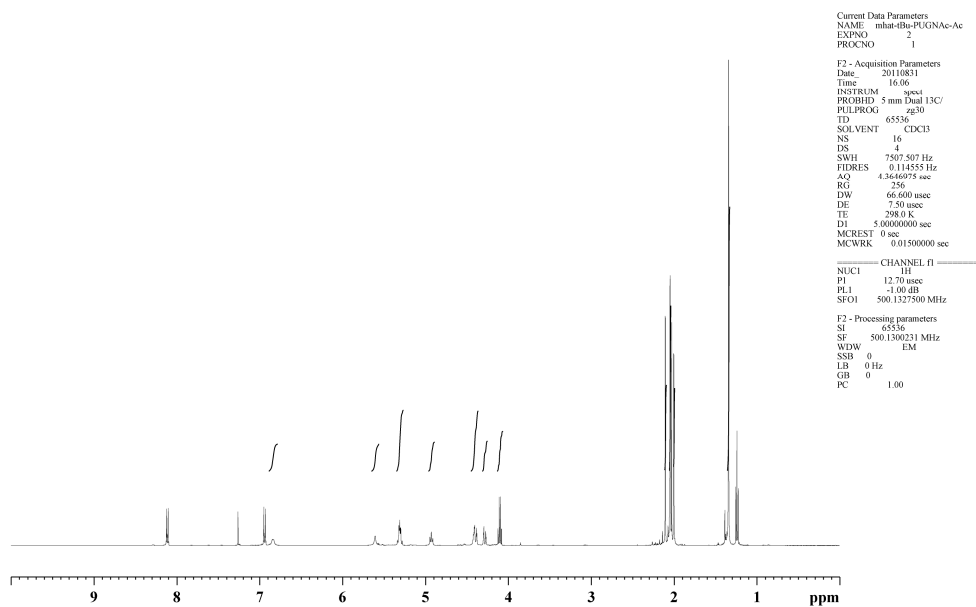

# <sup>1</sup>H NMR spectrum of **26**

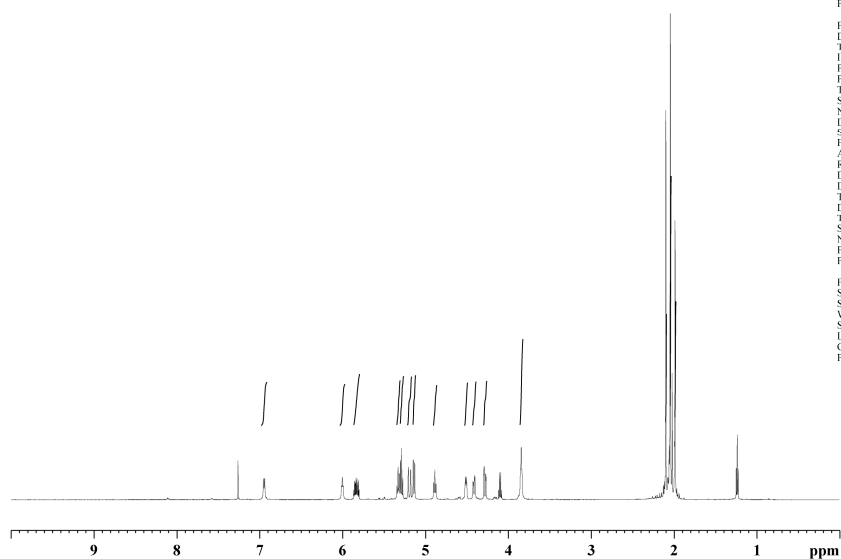

Current Data Parameters  
NAME mhat-allyl-pugnac-ac  
EXPNO 2  
PROCNO 1

F2 - Acquisition Parameters  
Date\_ 20110906  
Time 7.27  
INSTRUM spect  
PROBHD 5 mm TBO BB-1H  
PULPROG zg  
TD 65536  
SOLVENT CDCl3  
NS 16  
DS 4  
SWH 892.806 Hz  
FIDRES 0.137219 Hz  
AQ 3.6438017 sec  
RG 181  
DW 55.600 usec  
DE 7.00 usec  
TE 298.0 K  
D1 5.0000000 sec  
TD0 1  
SFO1 600.132688 MHz  
NUC1 1H  
PI 5.00 usec  
PLW1 -1.0000000 W

F2 - Processing parameters  
SI 65536  
SF 600.1300165 MHz  
WDW EM  
SSB 0  
LB 0.20 Hz  
GB 0  
PC 0.50

# <sup>13</sup>C NMR spectrum of **26**

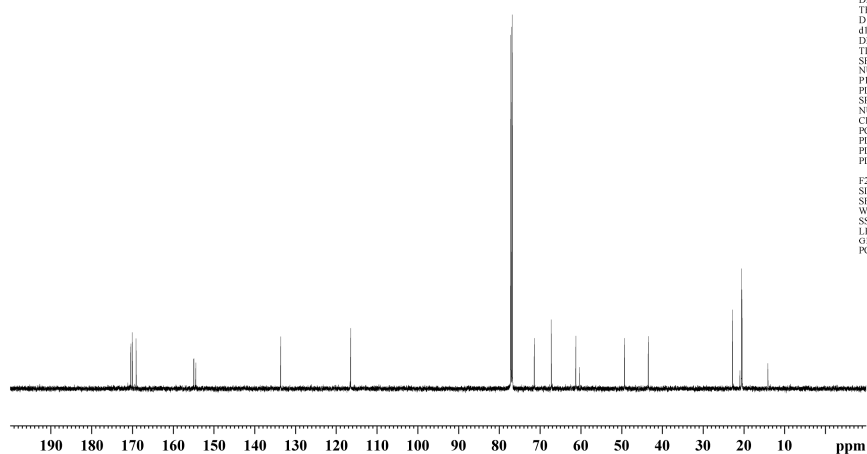

Current Data Parameters  
NAME mhat-allyl-pugnac-ac  
EXPNO 3  
PROCNO 1

F2 - Acquisition Parameters  
Date\_ 20110906  
Time 7.39  
INSTRUM spect  
PROBHD 5 mm TBO BB-1H  
PULPROG zgpg  
TD 65536  
SOLVENT CDCl3  
NS 240  
DS 24  
SWH 37593.984 Hz  
FIDRES 0.573639 Hz  
AQ 0.8716288 sec  
RG 7298.2  
DW 13.300 usec  
DE 7.00 usec  
TE 298.0 K  
D1 2.0000000 sec  
d11 0.0300000 sec  
DELTA 1.8999998 sec  
TD0 1  
SFO1 150.9178081 MHz  
NUC1 13C  
PI 3.00 usec  
PLW1 -1.0000000 W  
SFO2 600.1324500 MHz  
NUC2 1H  
CPDPRGJ2 waltz16  
PCPD2 100.00 usec  
PLW2 -1.0000000 W  
PLW12 -1.0000000 W  
PLW13 -1.0000000 W

F2 - Processing parameters  
SI 65536  
SF 150.9028181 MHz  
WDW EM  
SSB 0  
LB 1.00 Hz  
GB 0  
PC 1.00



# <sup>1</sup>H NMR spectrum of 27

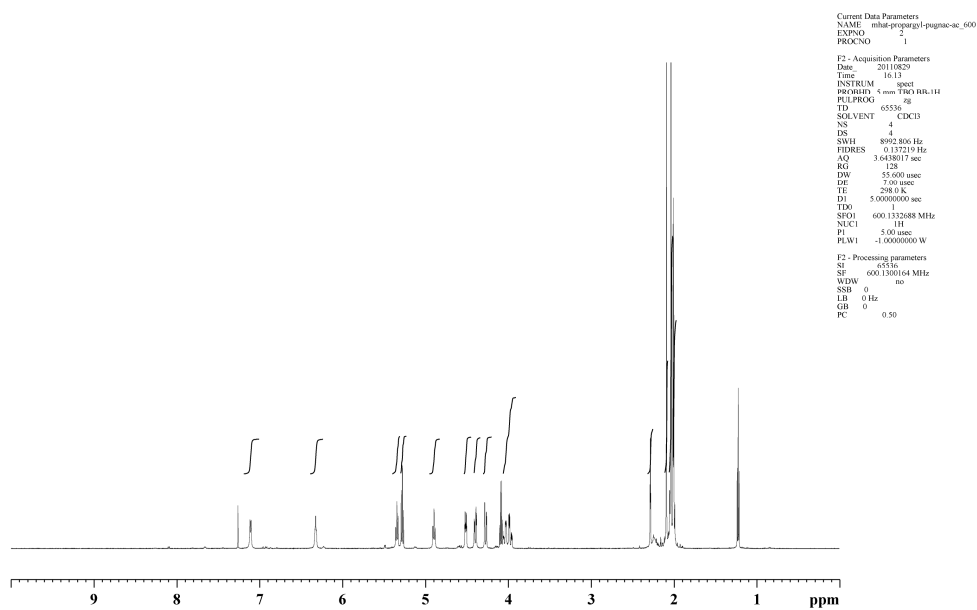

# <sup>13</sup>C NMR spectrum of 27

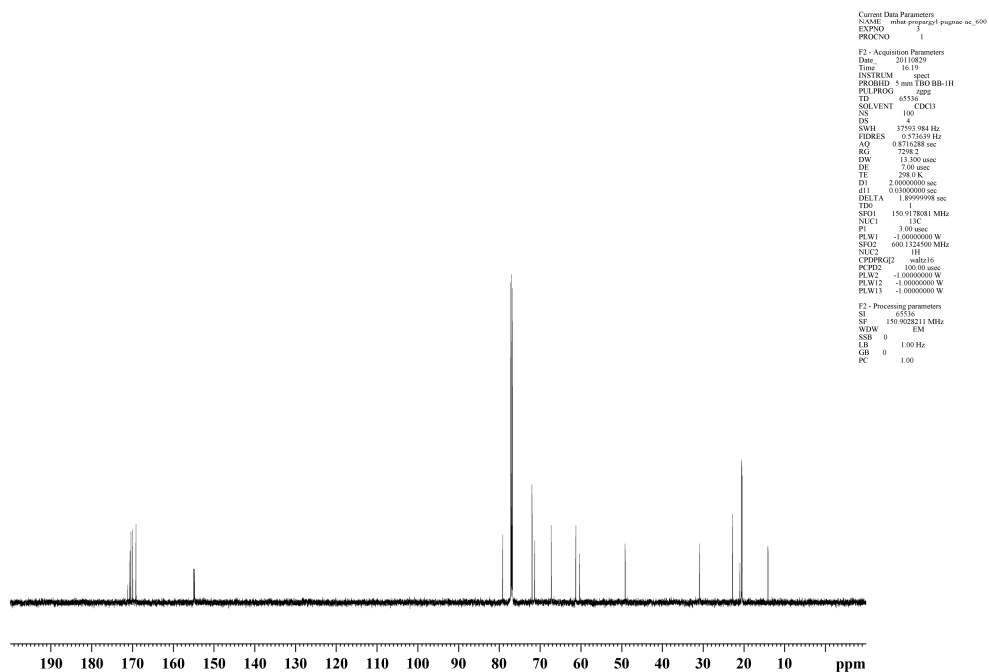

# $^1\text{H}$ NMR spectrum of **28**

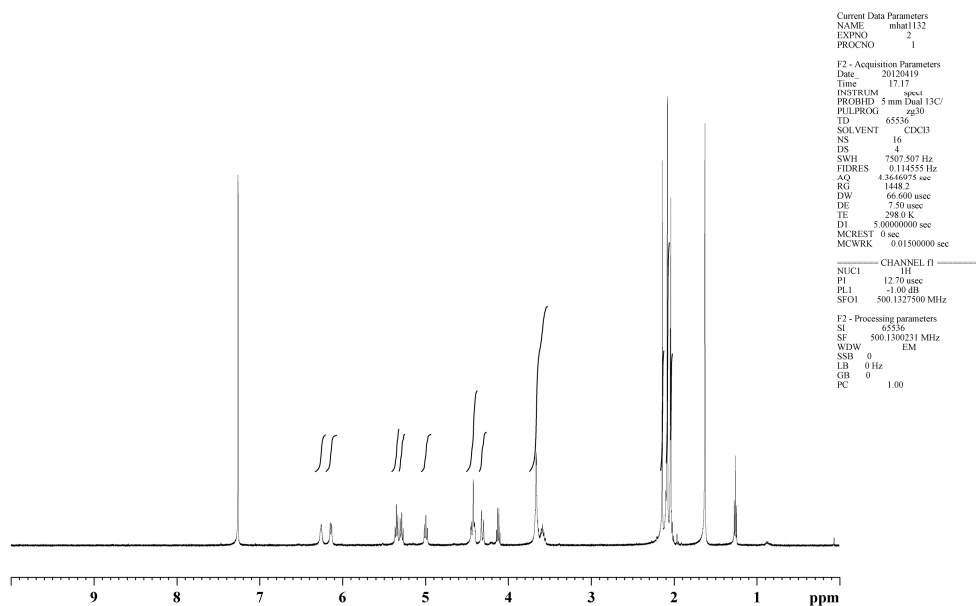

# $^{13}\text{C}$ NMR spectrum of **28**

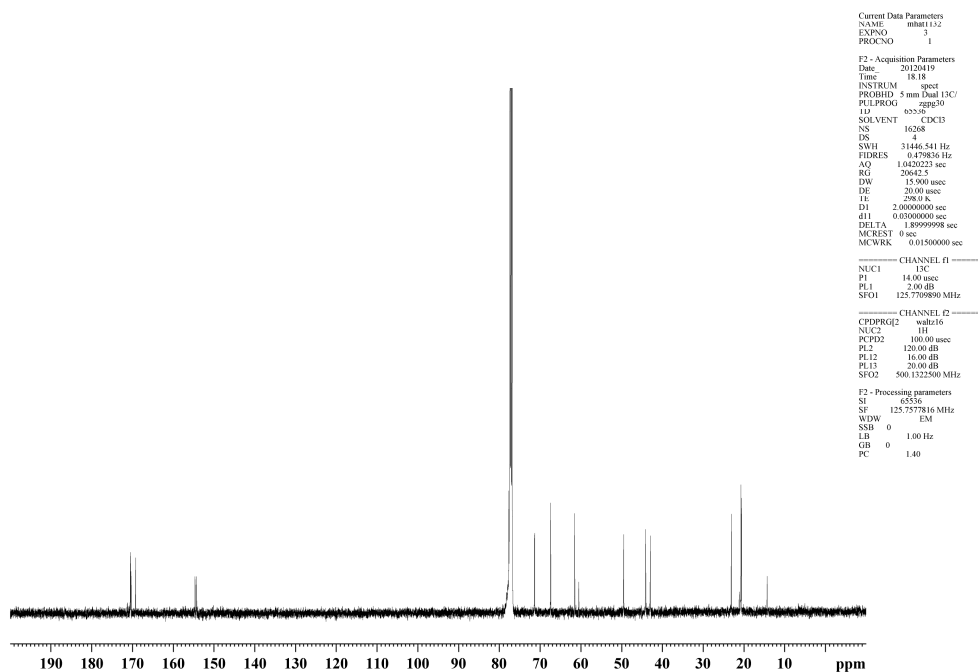

# $^1\text{H}$ NMR spectrum of **29**

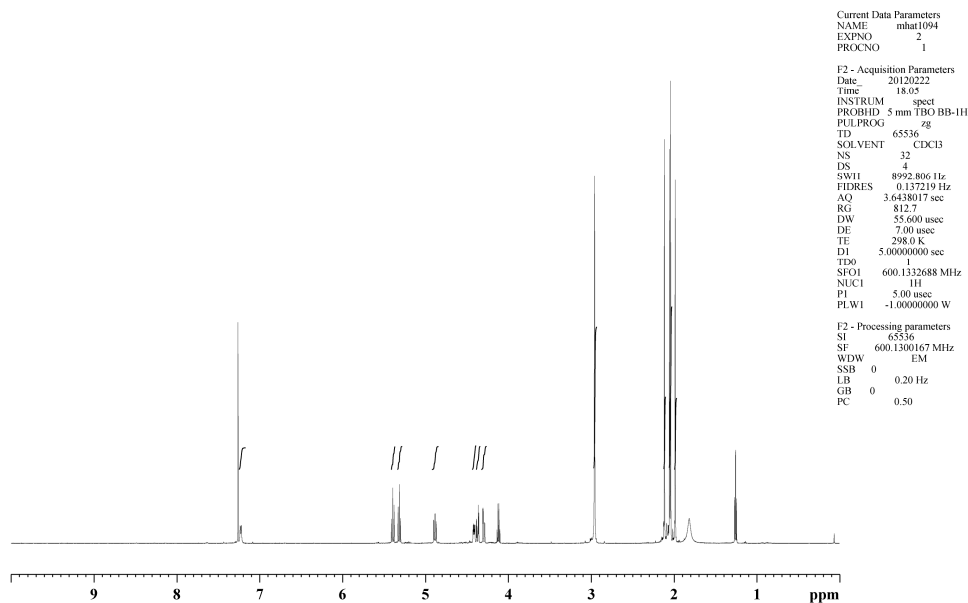

# $^{13}\text{C}$ NMR spectrum of **29**

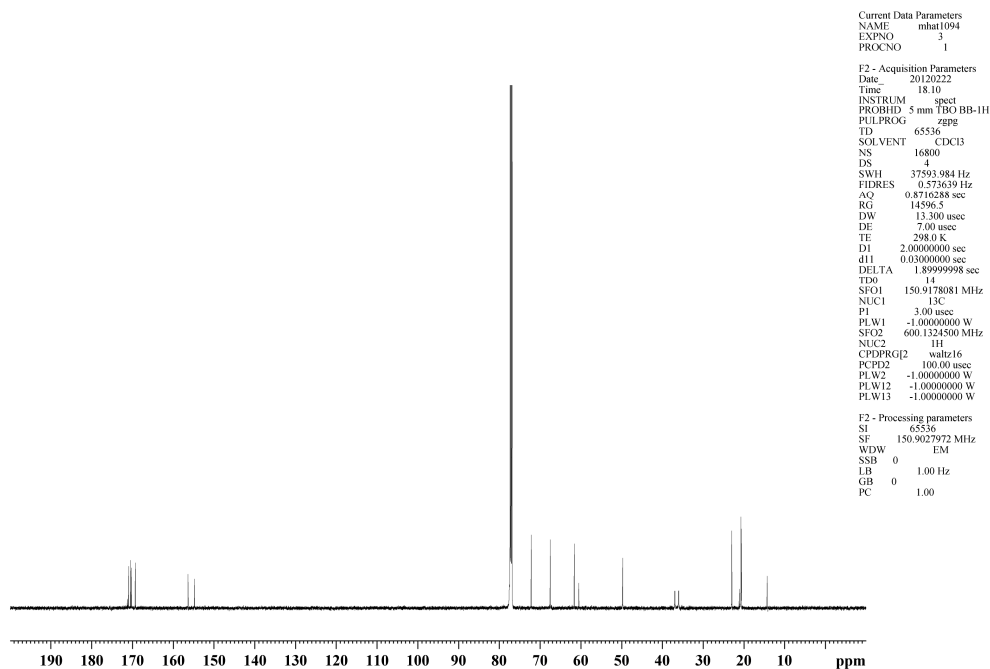

# $^1\text{H}$ NMR spectrum of **30**

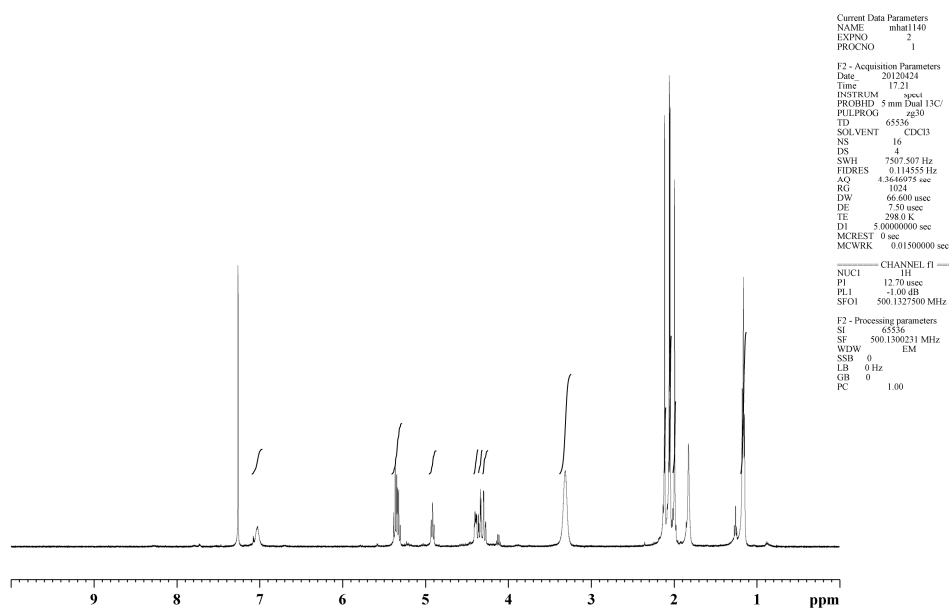

# $^{13}\text{C}$ NMR spectrum of **30**

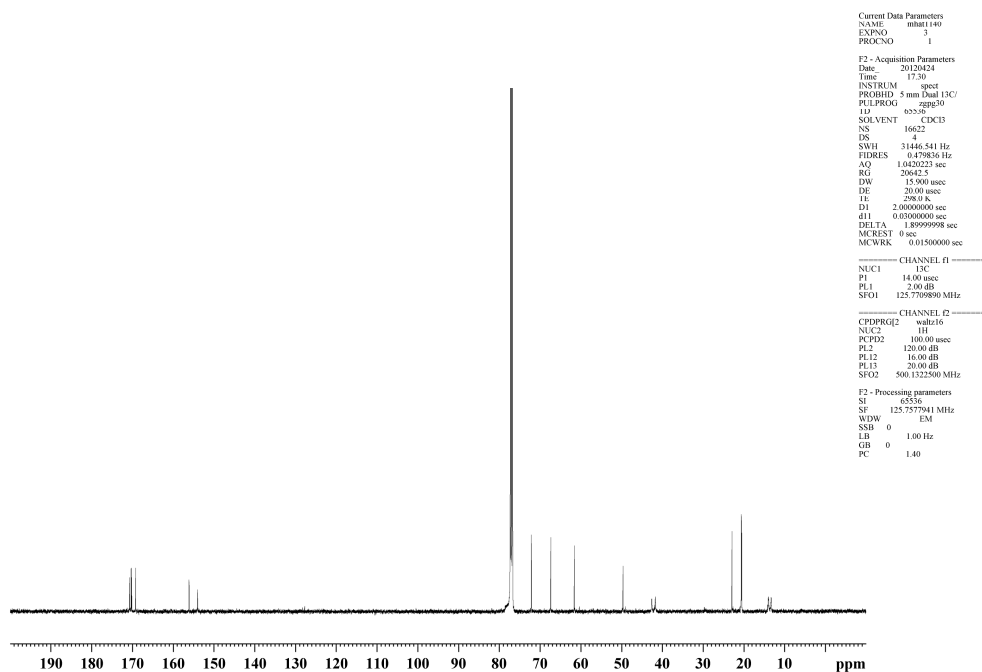

# $^1\text{H}$ NMR spectrum of **31**

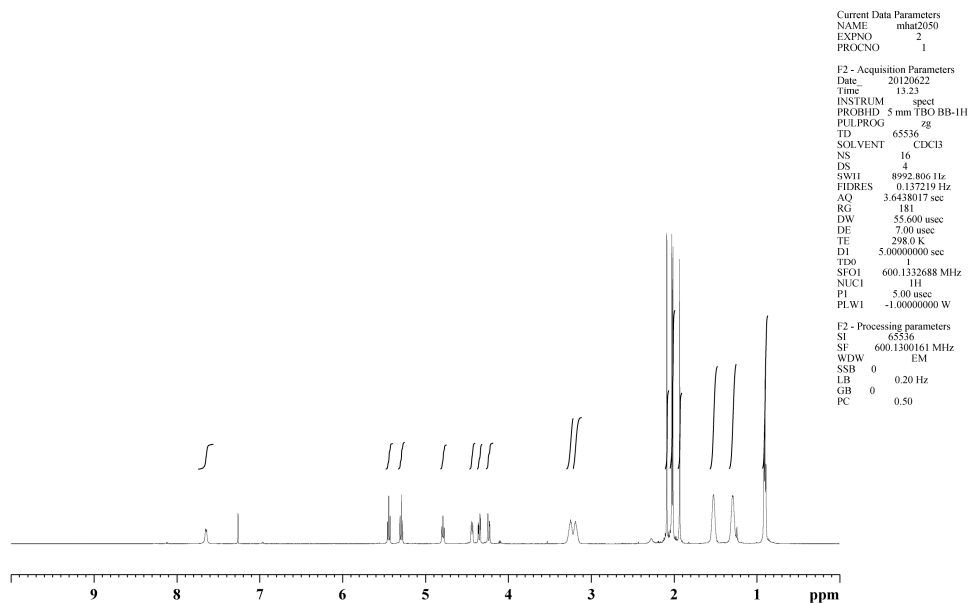

# $^{13}\text{C}$ NMR spectrum of **31**

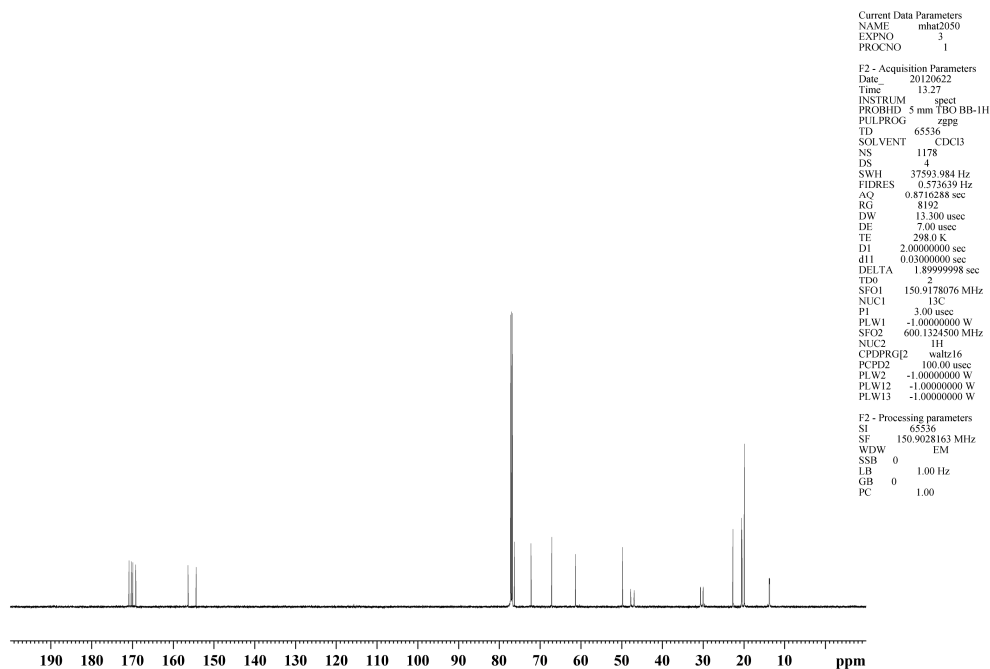

# <sup>1</sup>H NMR spectrum of 32

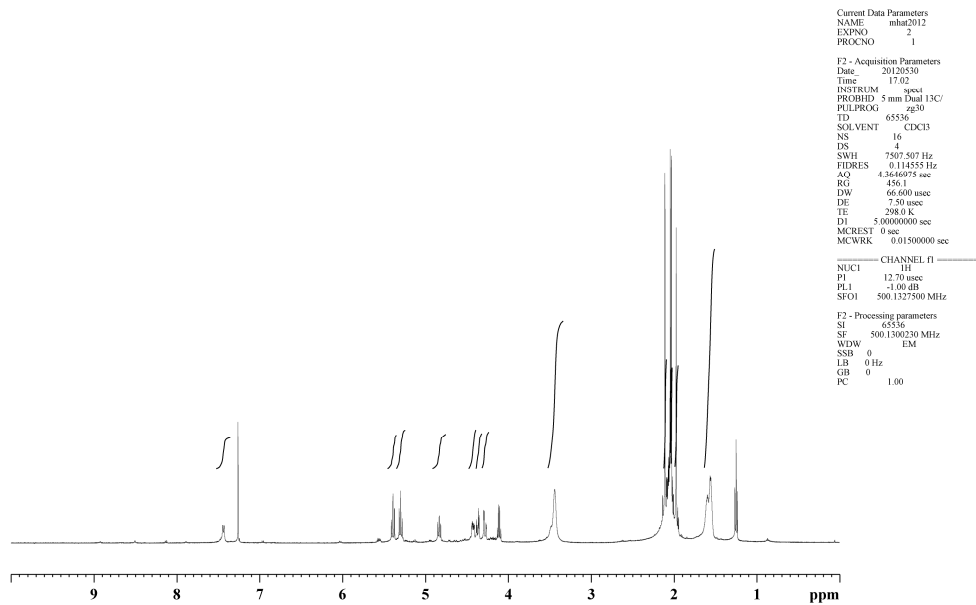

# <sup>13</sup>C NMR spectrum of 32

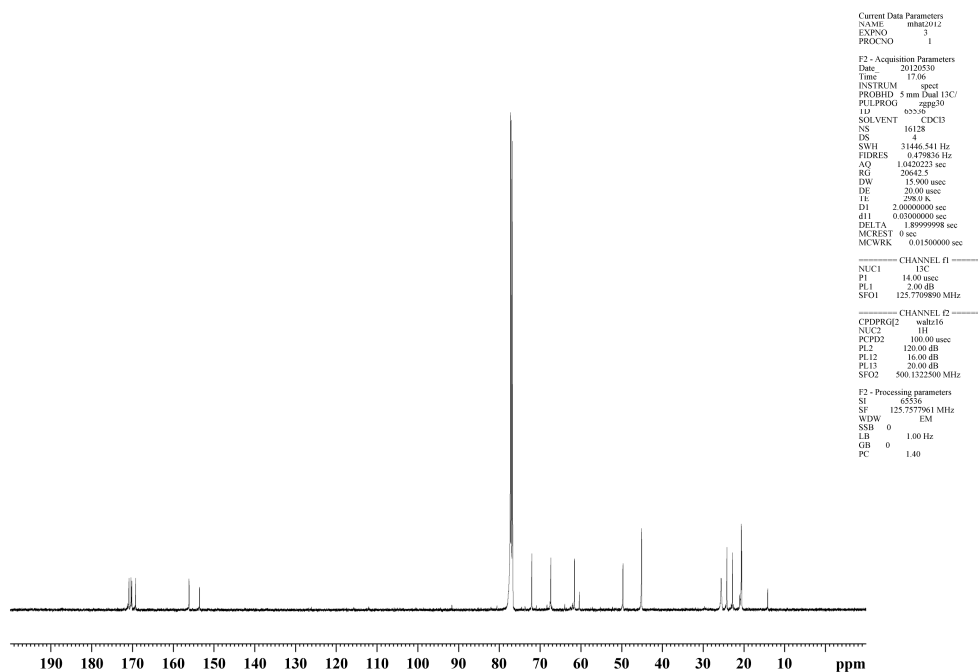

# $^1\text{H}$ NMR spectrum of **33**

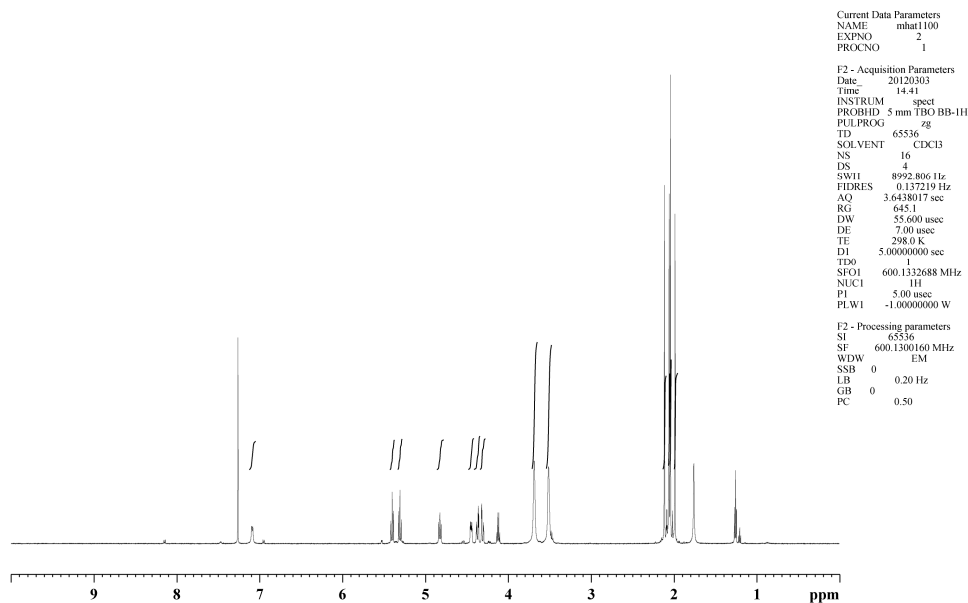

# $^{13}\text{C}$ NMR spectrum of **33**

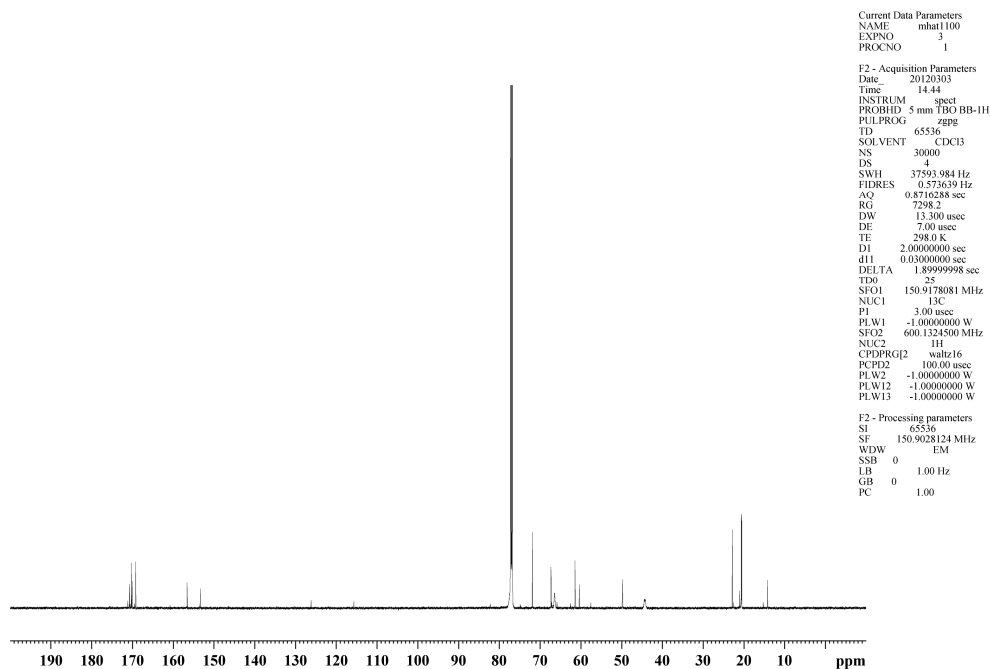

# $^1\text{H}$ NMR spectrum of **34**

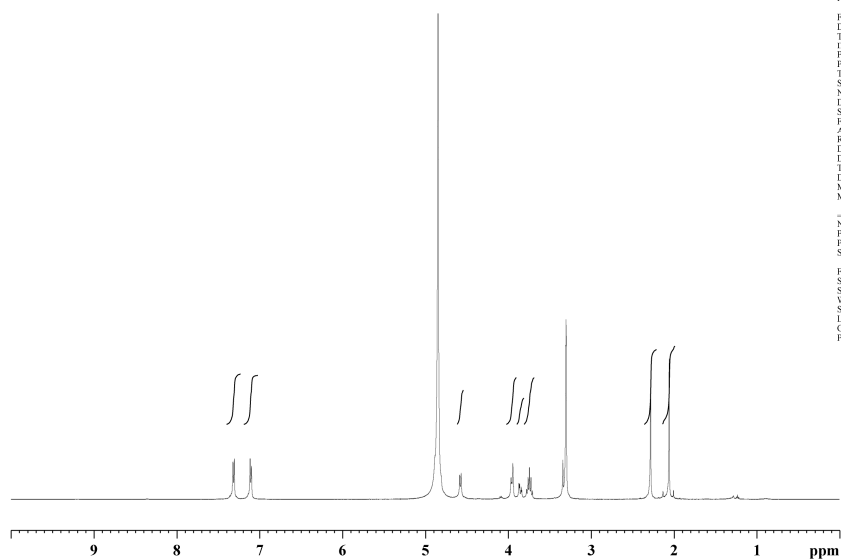

Current Data Parameters  
NAME mhat-methylpugnac  
EXPNO 2  
PROCNO 1

F2 - Acquisition Parameters  
Date\_ 20110629  
Time 18:24  
INSTRUM spect  
PROBHD 5 mm Dual 13C/  
PULPROG zg30  
TD 65536  
SOLVENT CDCl3  
NS 69  
DS 4  
SWH 7507.507 Hz  
FIDRES 0.114555 Hz  
AQ 4.3646978 sec  
RG 6451  
DW 66.600 usec  
DE 7.50 usec  
TE 298.0 K  
D1 5.0000000 sec  
MCREST 0 sec  
MCWRR 0.0150000 sec

----- CHANNEL f1 -----  
NUC1 1H  
P1 12.70 usec  
PL1 -1.00 dB  
SFO1 500.1327500 MHz

F2 - Processing parameters  
SI 65536  
SF 500.1300154 MHz  
WDW EM  
SSB 0  
LB 0 Hz  
GB 0  
PC 1.00

# $^{13}\text{C}$ NMR spectrum of **34**

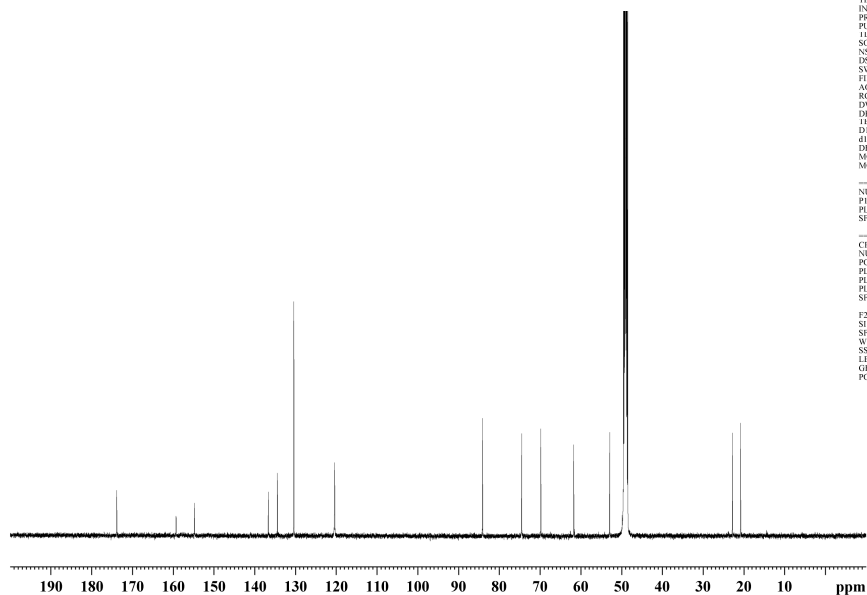

Current Data Parameters  
NAME mhat-methylpugnac  
EXPNO 2  
PROCNO 1

F2 - Acquisition Parameters  
Date\_ 20110629  
Time 19:30  
INSTRUM spect  
PROBHD 5 mm Dual 13C/  
PULPROG zgpg30  
TD 65536  
SOLVENT CDCl3  
NS 14976  
DS 4  
SWH 31446.541 Hz  
FIDRES 0.478836 Hz  
AQ 1.0620221 sec  
RG 20642.5  
DW 15.900 usec  
DE 20.00 usec  
TE 298.0 K  
D1 2.0000000 sec  
d11 0.0300000 sec  
DELTA 1.8999998 sec  
MCREST 0 sec  
MCWRR 0.0150000 sec

----- CHANNEL f1 -----  
NUC1 13C  
P1 14.00 usec  
PL1 2.00 dB  
SFO1 125.7708890 MHz

----- CHANNEL f2 -----  
CPDPRG2 waltz16  
NUC2 1H  
PCPD2 100.00 usec  
PL2 120.00 dB  
PL12 16.00 dB  
PL13 20.00 dB  
SFO2 500.1322500 MHz

F2 - Processing parameters  
SI 65536  
SF 125.7576150 MHz  
WDW EM  
SSB 0  
LB 1.00 Hz  
GB 0  
PC 1.40



# $^1\text{H}$ NMR spectrum of **35**

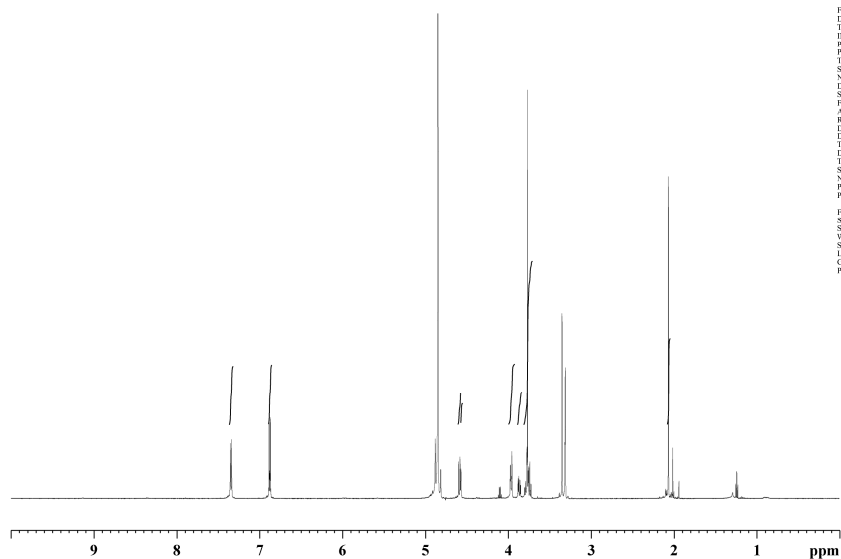

Current Data Parameters  
NAME mha-methoxy-pugnac-washed  
EXPNO 2  
PROCNO 1

F2 - Acquisition Parameters  
Date\_ 20110707  
Time 14.47  
INSTRUM spect  
PROBHD 5 mm TBO BB 1H  
PULPROG zg  
TD 65536  
SOLVENT MeOD  
NS 16  
DS 4  
SWH 892.806 Hz  
FIDRES 0.137219 Hz  
AQ 1.643817 sec  
RG 256  
DW 55.600 usec  
DE 7.50 usec  
TE 298.0 K  
D1 5.0000000 sec  
D0 1  
SFO1 600.132588 MHz  
NUC1 1H  
PI 5.00 usec  
PLW1 -1.0000000 W

F2 - Processing parameters  
SI 65536  
SF 600.130016 MHz  
WDW EM  
SSB 0  
LB 0 Hz  
GB 0  
PC 0.50

# $^{13}\text{C}$ NMR spectrum of **35**

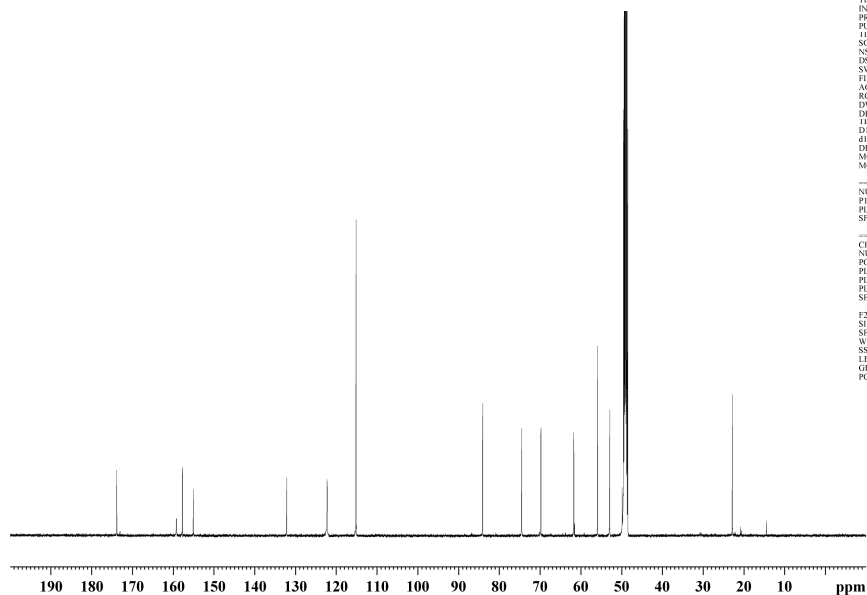

Current Data Parameters  
NAME mha-methoxy-pugnac  
EXPNO 2  
PROCNO 1

F2 - Acquisition Parameters  
Date\_ 20110707  
Time 17.00  
INSTRUM spect  
PROBHD 5 mm Dual 13C/  
PULPROG zgpg30  
TD 65536  
SOLVENT C-DCI3  
NS 4  
DS 4  
SWH 31446.541 Hz  
FIDRES 0.478836 Hz  
AQ 1.0230231 sec  
RG 18390.4  
DW 15.900 usec  
DE 20.00 usec  
TE 298.0 K  
D1 2.0000000 sec  
d11 0.03000000 sec  
DELTA 1.89999998 sec  
MCREST 0 sec  
MCMARK 0.01500000 sec

----- CHANNEL f1 -----  
NUC1 13C  
PI 14.00 usec  
PL1 2.00 dB  
SFO1 125.7708990 MHz

----- CHANNEL f2 -----  
CPDPRG2 waltz16  
NUC2 1H  
PCPD2 100.00 usec  
PL2 120.00 dB  
PL12 16.00 dB  
PL13 20.00 dB  
SFO2 500.1325260 MHz

F2 - Processing parameters  
SI 65536  
SF 125.7576140 MHz  
WDW EM  
SSB 0  
LB 1.00 Hz  
GB 0  
PC 1.40

# $^1\text{H}$ NMR spectrum of **36**

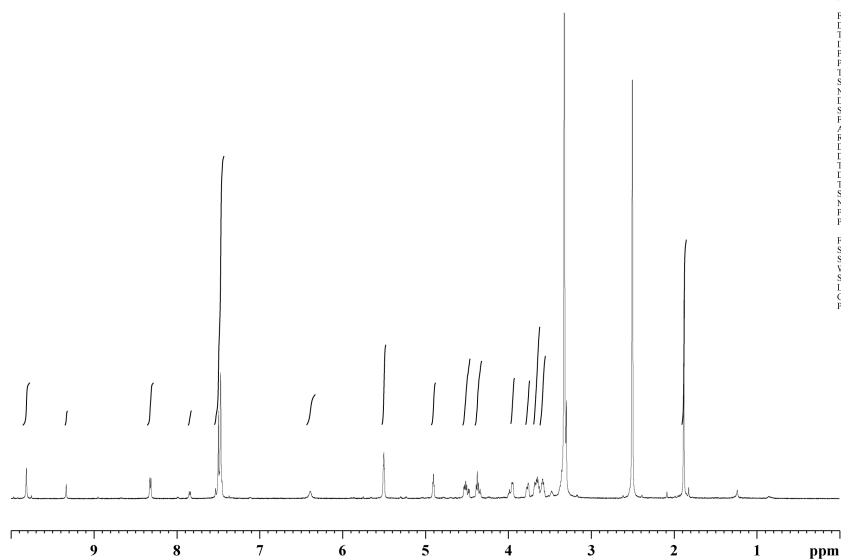

Current Data Parameters  
NAME mhaa-bromophenyl-pugnac  
EXPNO 2  
PROCNO 1

F2 - Acquisition Parameters  
Date\_ 20110915  
Time 16:05  
INSTRUM spect  
PROBHD 5 mm TBO BB-1H  
PULPROG zg  
TD 65536  
SOLVENT DMSO  
NS 32  
DS 4  
SWH 892.806 Hz  
FIDRES 0.137219 Hz  
AQ 3.6438017 sec  
RG 645.12  
DW 53.600 usec  
DE 7.00 usec  
TE 298.0 K  
D1 5.0000000 sec  
TD0 1  
SFO1 600.1332688 MHz  
NUC1 1H  
P1 5.00 usec  
PLW1 -1.0000000 W

F2 - Processing parameters  
SI 65536  
SF 600.130072 MHz  
WDW EM  
SSB 0  
LB 0.20 Hz  
GB 0  
PC 0.50

# $^{13}\text{C}$ NMR spectrum of **36**

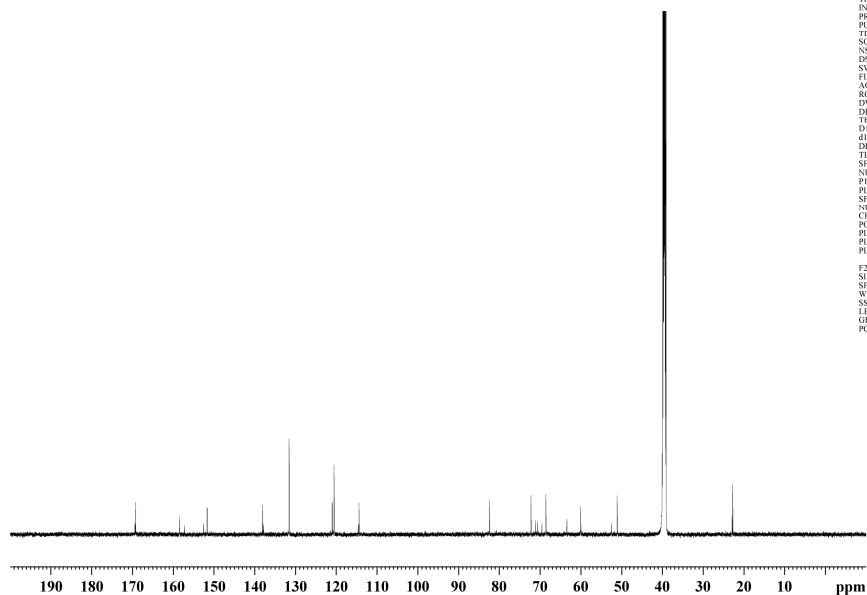

Current Data Parameters  
NAME mhaa-bromophenyl-pugnac  
EXPNO 1  
PROCNO 1

F2 - Acquisition Parameters  
Date\_ 20110915  
Time 17:09  
INSTRUM spect  
PROBHD 5 mm TBO BB-1H  
PULPROG zgpg30  
TD 65536  
SOLVENT DMSO  
NS 19420  
DS 4  
SWH 37593.984 Hz  
FIDRES 0.573639 Hz  
AQ 0.8716288 sec  
RG 7298.2  
DW 13.300 usec  
DE 7.00 usec  
TE 298.0 K  
D1 2.0000000 sec  
d11 0.0300000 sec  
DELTA 1.8999998 sec  
TD0 17  
SFO1 150.9178081 MHz  
NUC1 13C  
P1 3.00 usec  
PLW1 -1.0000000 W  
SFO2 600.1324500 MHz  
NUC2 1H  
CPDPRG2 waltz16  
PCPD2 100.00 usec  
PLW2 -1.0000000 W  
PLW12 -1.0000000 W  
PLW13 -1.0000000 W

F2 - Processing parameters  
SI 65536  
SF 150.902846 MHz  
WDW EM  
SSB 0  
LB 1.00 Hz  
GB 0  
PC 1.00

# $^1\text{H}$ NMR spectrum of **37**

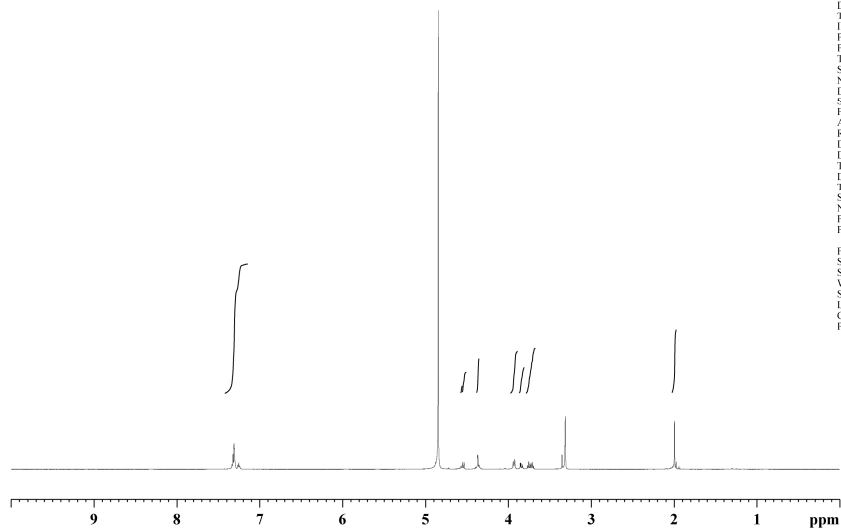

Current Data Parameters  
NAME mhat-benzylpugnac  
EXPNO 2  
PROCNO 1

F2 - Acquisition Parameters  
Date\_ 20110701  
Time 12.27  
INSTRUM spect  
PROBHD 5 mm TBO-BB-1H  
PULPROG zg  
TD 65536  
SOLVENT MeOD  
NS 64  
DS 4  
SWH 8992.806 Hz  
FIDRES 0.137219 Hz  
AQ 3.6438017 sec  
RG 456.1  
DW 55.600 usec  
DE 7.00 usec  
TE 298.0 K  
D1 5.00000000 sec  
TD0 1  
SFO1 600.1332688 MHz  
NUC1 1H  
PI 5.00 usec  
PLW1 -1.00000000 W

F2 - Processing parameters  
SI 65536  
SF 600.1300138 MHz  
WDW no  
SSB 0  
LB 0 Hz  
GB 0  
PC 0.50

# $^{13}\text{C}$ NMR spectrum of **37**

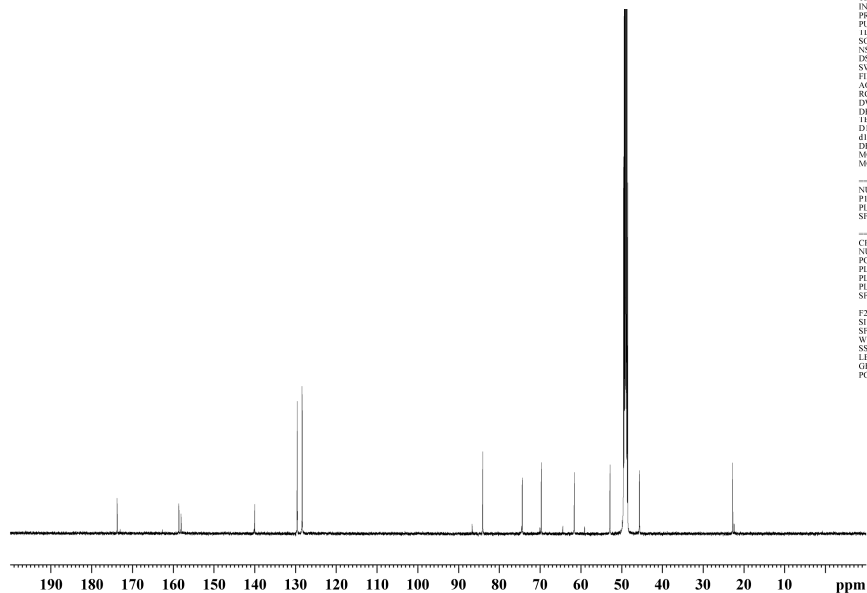

Current Data Parameters  
NAME mhat-benzyl-PLUGNAC  
EXPNO 1  
PROCNO 1

F2 - Acquisition Parameters  
Date\_ 20110630  
Time 19.58  
INSTRUM spect  
PROBHD 5 mm Dual 13C/  
PULPROG zgpg30  
TD 65536  
SOLVENT CDCl3  
NS 13824  
DS 4  
SWH 31446.541 Hz  
FIDRES 0.478836 Hz  
AQ 1.0620221 sec  
RG 18390.4  
DW 15.900 usec  
DE 20.00 usec  
TE 298.0 K  
D1 2.00000000 sec  
d11 0.03000000 sec  
DELTA 1.89999998 sec  
MCREST 0 sec  
MCMARK 0.01500000 sec

----- CHANNEL f1 -----  
NUC1 13C  
PI 14.00 usec  
PL1 2.00 dB  
SFO1 125.7708090 MHz

----- CHANNEL f2 -----  
CPDPRG2 waltz16  
NUC2 1H  
PCPD2 100.00 usec  
PL2 120.00 dB  
PL12 16.00 dB  
PL13 20.00 dB  
SFO2 500.1322500 MHz

F2 - Processing parameters  
SI 65536  
SF 125.7576150 MHz  
WDW EM  
SSB 0  
LB 1.00 Hz  
GB 0  
PC 1.40

# $^1\text{H}$ NMR spectrum of **38**

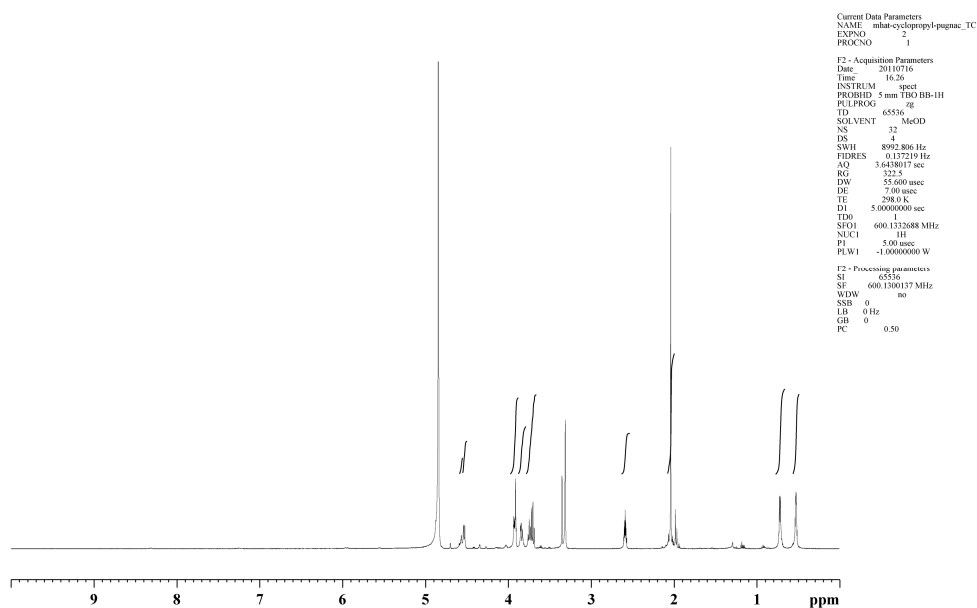

# $^{13}\text{C}$ NMR spectrum of **38**

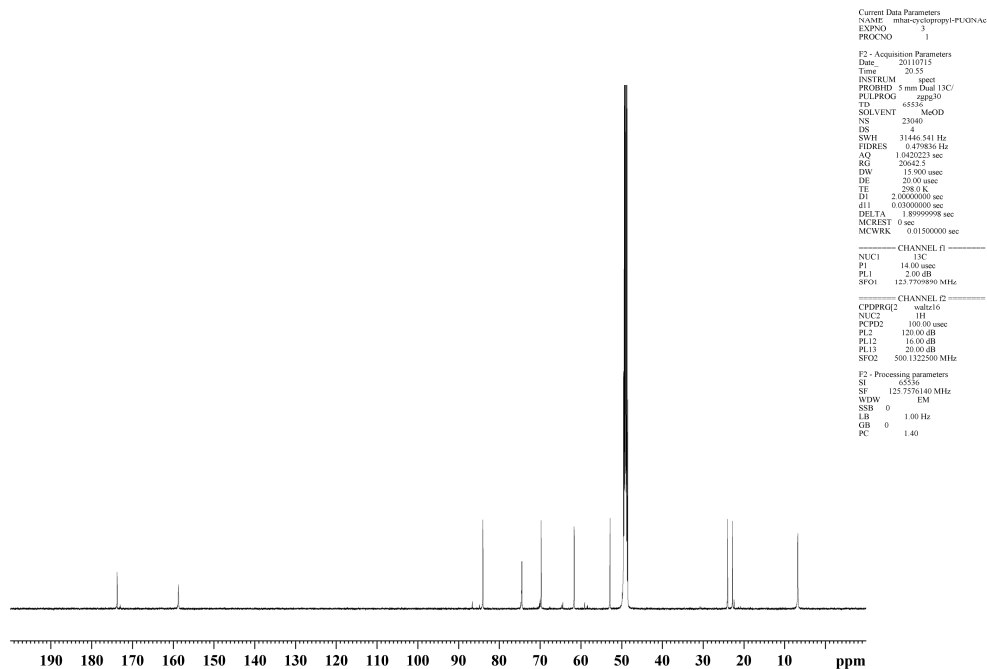

# $^1\text{H}$ NMR spectrum of **39**

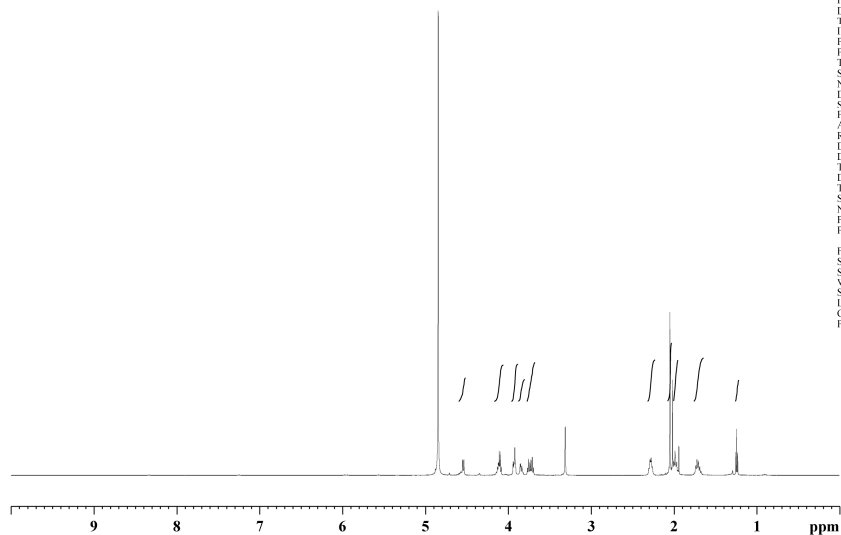

Current Data Parameters  
NAME mhat-cyclobutylpugnac  
EXPNO 2  
PROCNO 1

F2 - Acquisition Parameters  
Date\_ 20110811  
Time 16.21  
INSTRUM spect  
PROBHD 5 mm TBO BB-1H  
PULPROG zg  
TD 65536  
SOLVENT MeOD  
NS 16  
DS 4  
SWH 8992.806 Hz  
FIDRES 0.137219 Hz  
AQ 3.6438017 sec  
RG 228.1  
DW 55.600 usec  
DE 7.00 usec  
TE 298.0 K  
DJ 5.00000000 sec  
TDO 1  
SFO1 600.1322688 MHz  
NUC1 1H  
P1 5.00 usec  
PLW1 -1.00000000 W

F2 - Processing parameters  
SI 65536  
SF 600.1300136 MHz  
WDW no  
SSB 0  
LB 0 Hz  
GB 0  
PC 0.50

# $^{13}\text{C}$ NMR spectrum of **39**

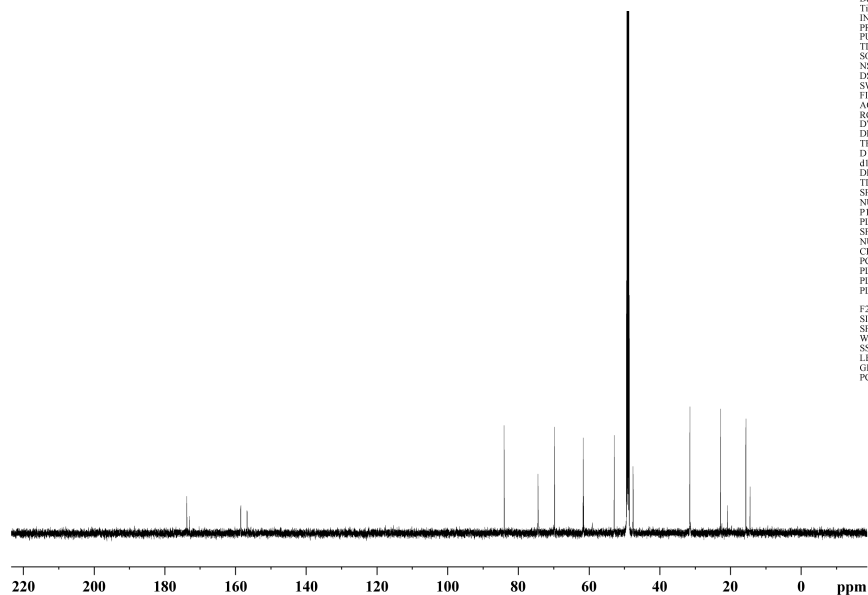

Current Data Parameters  
NAME mhat-cyclobutylpugnac  
EXPNO 2  
PROCNO 1

F2 - Acquisition Parameters  
Date\_ 20110811  
Time 16.27  
INSTRUM spect  
PROBHD 5 mm TBO BB-1H  
PULPROG zgpg  
TD 65536  
SOLVENT MeOD  
NS 300  
DS 4  
SWH 37593.984 Hz  
FIDRES 0.573639 Hz  
AQ 0.8716288 sec  
RG 11585.2  
DW 13.300 usec  
DE 7.00 usec  
TE 298.0 K  
DJ 2.00000000 sec  
d11 0.03000000 sec  
TDO 1.89999998 sec  
SFO1 150.9178081 MHz  
NUC1 13C  
P1 3.00 usec  
PLW1 -1.00000000 W  
SFO2 600.1324500 MHz  
NUC2 1H  
CPCPRG2 waltz16  
PCPD2 100.00 usec  
PLW2 -1.00000000 W  
PLW12 -1.00000000 W  
PLW13 -1.00000000 W

F2 - Processing parameters  
SI 65536  
SF 150.9025995 MHz  
WDW EM  
SSB 0  
LB 1.00 Hz  
GB 0  
PC 1.00

# <sup>1</sup>H NMR spectrum of **40**

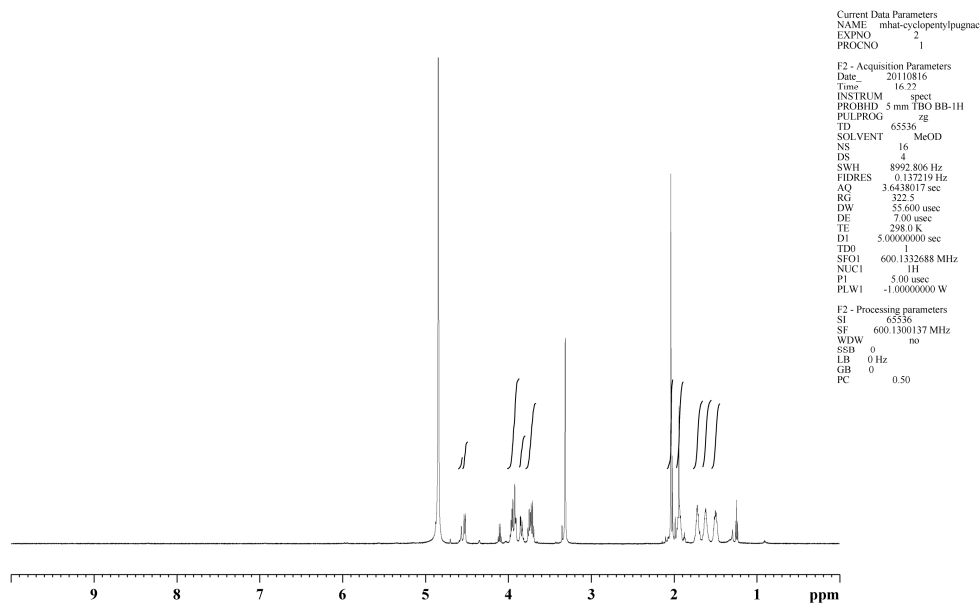

# <sup>13</sup>C NMR spectrum of **40**

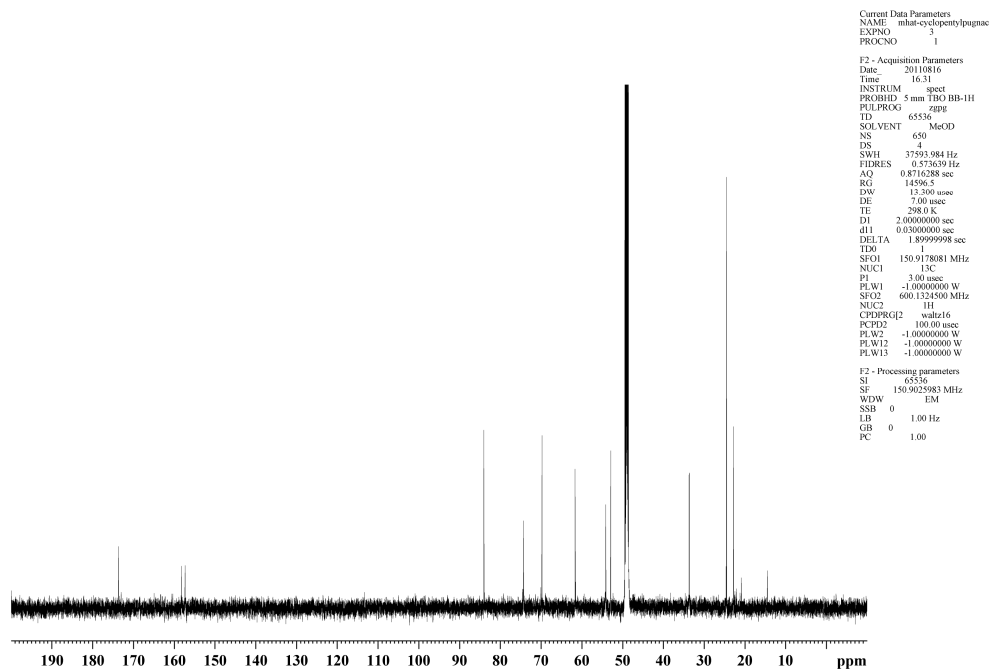

# $^1\text{H}$ NMR spectrum of **41**

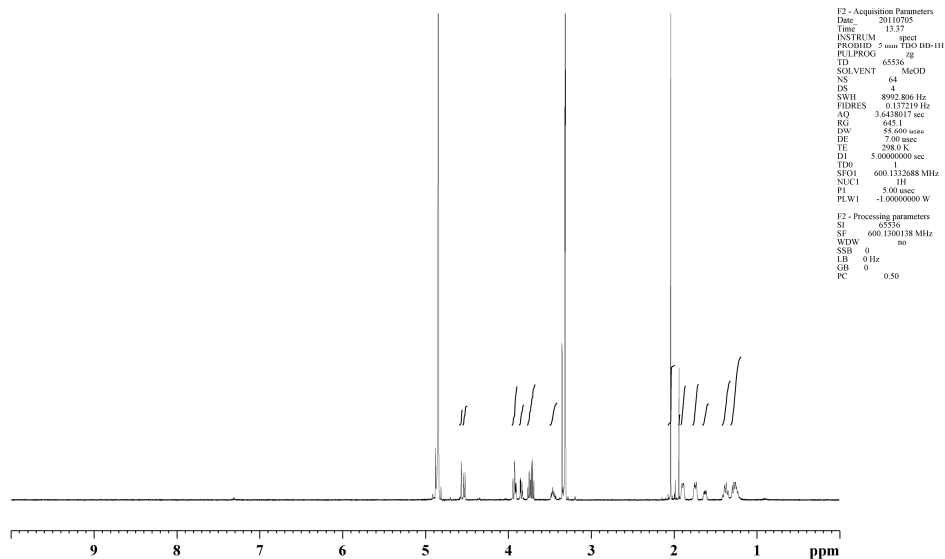

# $^{13}\text{C}$ NMR spectrum of **41**

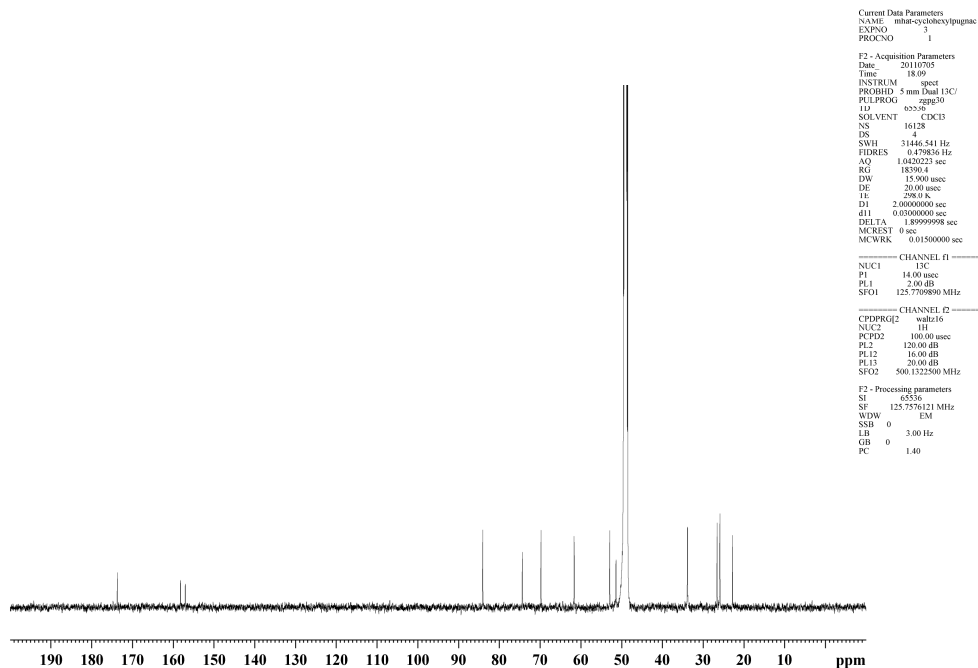

# $^1\text{H}$ NMR spectrum of **42**

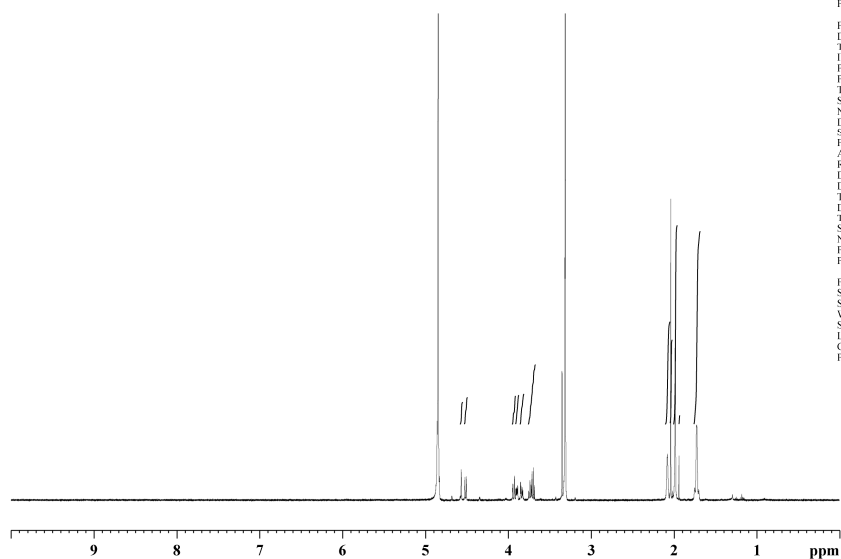

```
Current Data Parameters
NAME mhat-aa-pugnac
EXPNO 2
PROCNO 1

F2 - Acquisition Parameters
Date_ 20110706
Time 15.58
INSTRUM spect
PROBHD 5 mm TBO-BB-1H
PULPROG zg
TD 65536
SOLVENT MeOD
NS 16
DS 4
SWH 892.806 Hz
FIDRES 0.137219 Hz
AQ 3.643017 sec
RG 574.7
DW 55.600 usec
DE 7.00 usec
TE 298.0 K
D1 5.0000000 sec
TD0 1
SFO1 600.1332688 MHz
NUC1 1H
PI 5.00 usec
PLW1 -1.0000000 W

F2 - Processing parameters
SI 65536
SF 600.1300137 MHz
WDW no
SSB 0
LB 0 Hz
GB 0
PC 0.50
```

# $^{13}\text{C}$ NMR spectrum of **42**

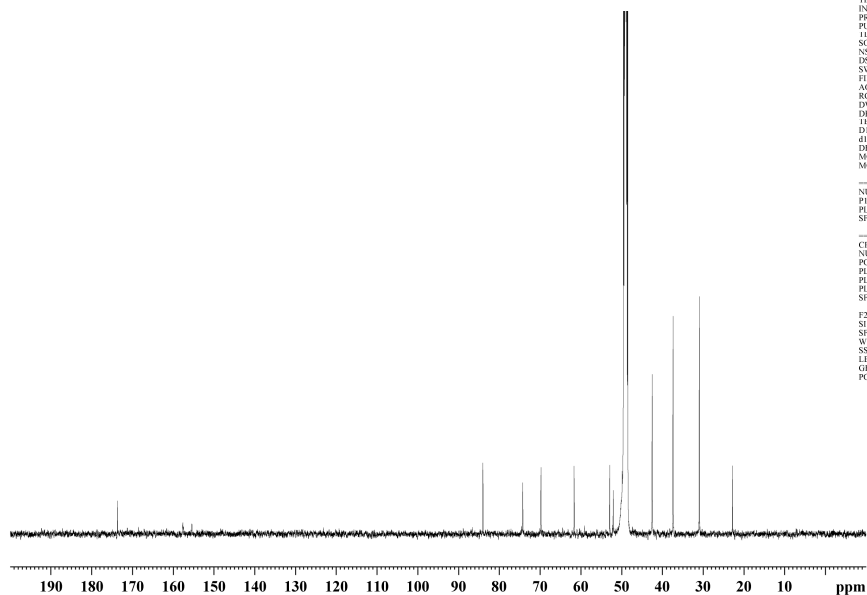

```
Current Data Parameters
NAME mhat-aa-pugnac
EXPNO 2
PROCNO 1

F2 - Acquisition Parameters
Date_ 20110706
Time 17.42
INSTRUM spect
PROBHD 5 mm Dual 13C/
PULPROG zgpg30
TD 65536
SOLVENT MeOD
NS 16128
DS 4
SWH 31446.541 Hz
FIDRES 0.478836 Hz
AQ 1.020221 sec
RG 16384
DW 15.900 usec
DE 20.00 usec
TE 298.0 K
D1 2.0000000 sec
d11 0.03000000 sec
DELTA 1.8999998 sec
MCREST 0 sec
MCMARK 0.01500000 sec

----- CHANNEL f1 -----
NUC1 13C
PI 14.00 usec
PL1 2.00 dB
SFO1 125.7708890 MHz

----- CHANNEL f2 -----
CPDPRG2 waltz16
NUC2 1H
PCPD2 100.00 usec
PL2 120.00 dB
PL12 16.00 dB
PL13 20.00 dB
SFO2 500.1322500 MHz

F2 - Processing parameters
SI 65536
SF 125.7576121 MHz
WDW EM
SSB 0
LB 3.00 Hz
GB 0
PC 1.40
```



# $^1\text{H}$ NMR spectrum of **43**

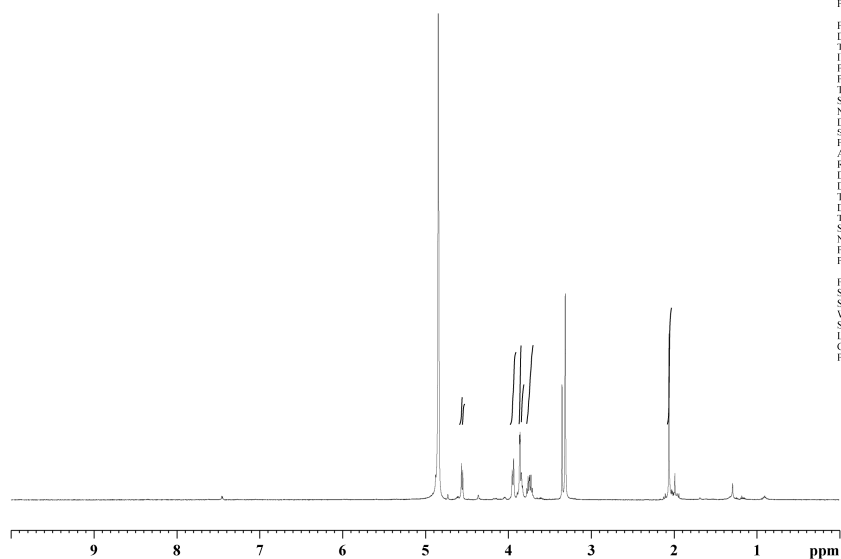

Current Data Parameters  
NAME mlhat-gly-pugnac  
EXPNO 2  
PROCNO 1

F2 - Acquisition Parameters  
Date\_ 20110819  
Time 17.01  
INSTRUM spect  
PROBHD 5 mm TBO-BB-1H  
PULPROG zg  
TD 65536  
SOLVENT MeOD  
NS 16  
DS 4  
SWH 892.806 Hz  
FIDRES 0.137219 Hz  
AQ 3.6438017 sec  
RG 362  
DW 55.600 usec  
DE 7.00 usec  
TE 298.0 K  
D1 5.0000000 sec  
TD0 1  
SFO1 600.132688 MHz  
NUC1  $^1\text{H}$   
PI 5.00 usec  
PLW1 -1.0000000 W

F2 - Processing parameters  
SI 65536  
SF 600.1300137 MHz  
WDW EM  
SSB 0  
LB 0.20 Hz  
GB 0  
PC 0.50

# $^{13}\text{C}$ NMR spectrum of **43**

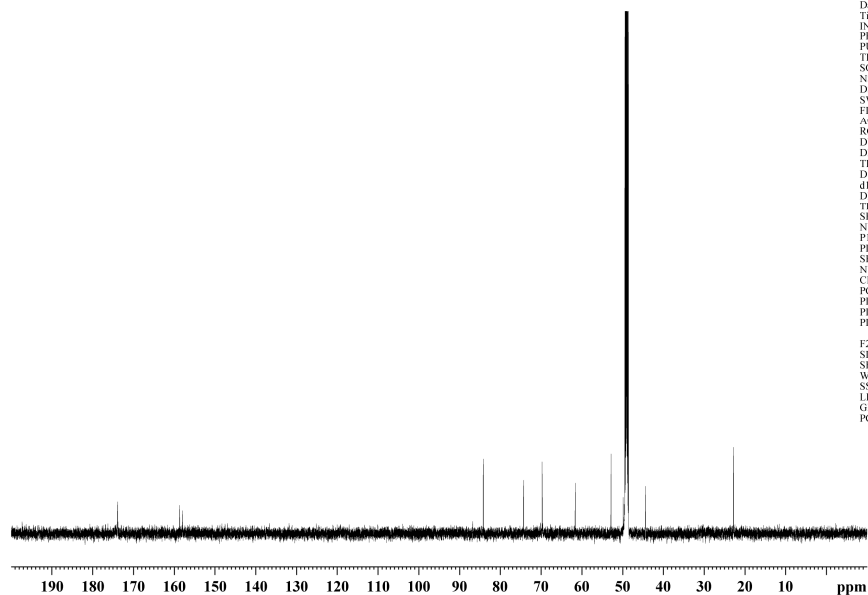

Current Data Parameters  
NAME mlhat-gly-pugnac  
EXPNO 3  
PROCNO 1

F2 - Acquisition Parameters  
Date\_ 20110819  
Time 17.18  
INSTRUM spect  
PROBHD 5 mm TBO-BB-1H  
PULPROG zgpg  
TD 65536  
SOLVENT MeOD  
NS 685  
DS 4  
SWH 37593.984 Hz  
FIDRES 0.573639 Hz  
AQ 0.8716288 sec  
RG 14596.5  
DW 15.300 usec  
DE 7.00 usec  
TE 298.0 K  
D1 2.0000000 sec  
d11 0.0300000 sec  
DELTA 1.8999998 sec  
TD0 1  
SFO1 150.9178081 MHz  
NUC1  $^{13}\text{C}$   
PI 3.00 usec  
PLW1 -1.0000000 W  
SFO2 600.1324500 MHz  
NUC2  $^1\text{H}$   
CPDPRG2 waltz16  
PCPD2 100.00 usec  
PLW2 -1.0000000 W  
PLW12 -1.0000000 W  
PLW13 -1.0000000 W

F2 - Processing parameters  
SI 65536  
SF 150.9025977 MHz  
WDW EM  
SSB 0  
LB 1.00 Hz  
GB 0  
PC 1.00

# $^1\text{H}$ NMR spectrum of **44**

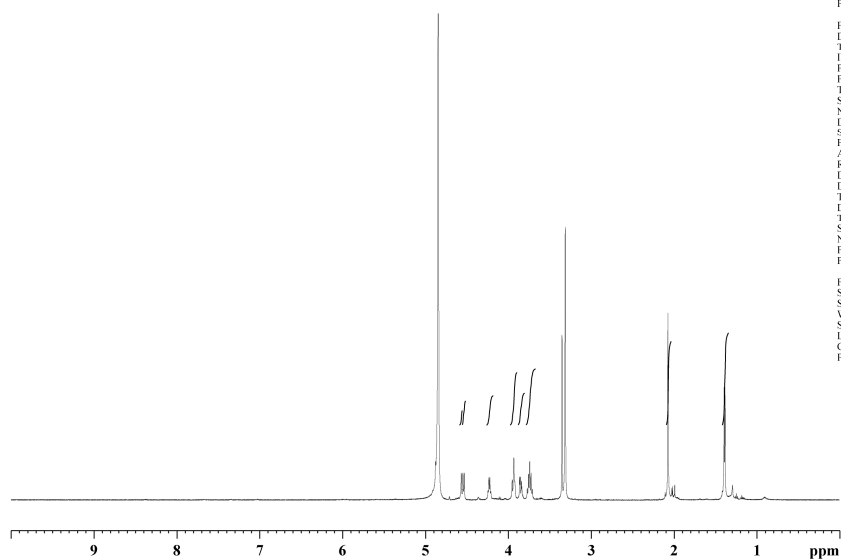

Current Data Parameters  
NAME mhat-ala-pugnac\_600  
EXPNO 2  
PROCNO 1

F2 - Acquisition Parameters  
Date\_ 20110712  
Time 14.59  
INSTRUM spect  
PROBHD 5 mm TBO-BB-1H  
PULPROG zg  
TD 65536  
SOLVENT MeOD  
NS 64  
DS 4  
SWH 8992.806 Hz  
FIDRES 0.137219 Hz  
AQ 3.6438017 sec  
RG 456.1  
DW 55.600 usec  
DE 7.00 usec  
TE 298.0 K  
D1 5.00000000 sec  
TD0 1  
SFO1 600.132688 MHz  
NUC1 1H  
PI 5.00 usec  
PLW1 -1.00000000 W

F2 - Processing parameters  
SI 65536  
SF 600.1300137 MHz  
WDW no  
SSB 0  
LB 0 Hz  
GB 0  
PC 0.50

# $^{13}\text{C}$ NMR spectrum of **44**

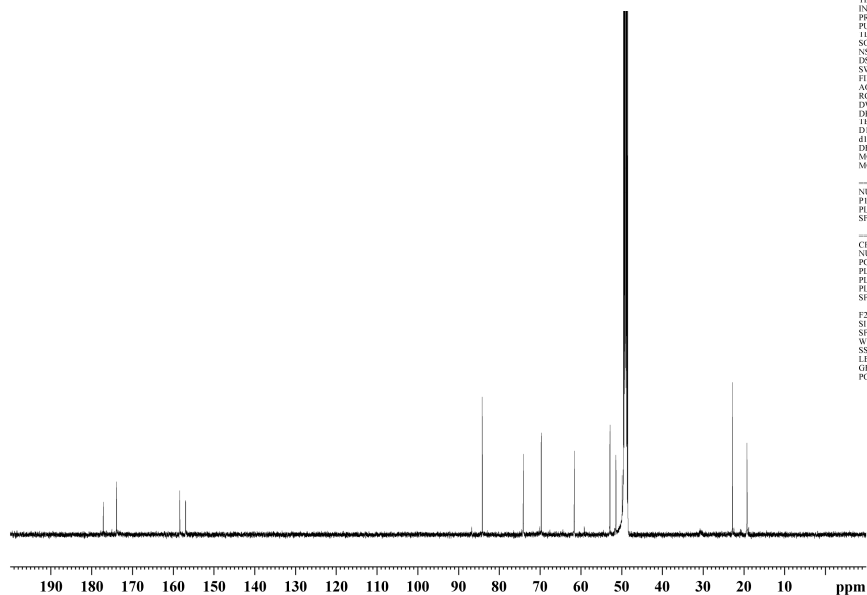

Current Data Parameters  
NAME mhat-ala-pugnac  
EXPNO 1  
PROCNO 1

F2 - Acquisition Parameters  
Date\_ 20110712  
Time 17.10  
INSTRUM spect  
PROBHD 5 mm Dual 13C/  
PULPROG zgpg30  
TD 62528  
SOLVENT MeOD  
NS 17280  
DS 4  
SWH 31446.541 Hz  
FIDRES 0.478836 Hz  
AQ 1.0620221 sec  
RG 20642.5  
DW 15.900 usec  
DE 20.00 usec  
TE 298.0 K  
D1 2.0000000 sec  
d11 0.03000000 sec  
DELTA 1.89999998 sec  
MCREST 0 sec  
MCMRK 0.01500000 sec

----- CHANNEL f1 -----  
NUC1 13C  
PI 14.00 usec  
PL1 2.00 dB  
SFO1 125.7708980 MHz

----- CHANNEL f2 -----  
CPDPRG2 waltz16  
NUC2 1H  
PCPD2 100.00 usec  
PL2 120.00 dB  
PL12 16.00 dB  
PL13 20.00 dB  
SFO2 500.1322500 MHz

F2 - Processing parameters  
SI 65536  
SF 125.7576150 MHz  
WDW EM  
SSB 0  
LB 1.00 Hz  
GB 0  
PC 1.40

# $^1\text{H}$ NMR spectrum of **45**

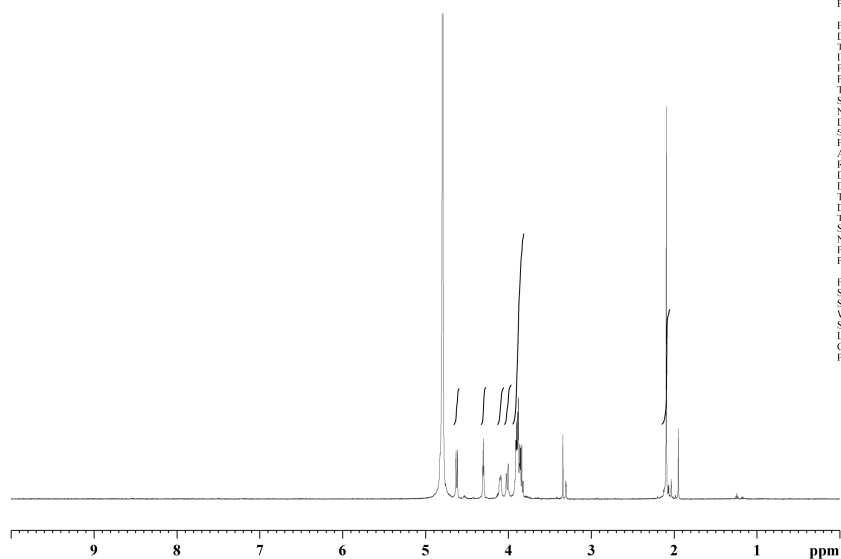

Current Data Parameters  
NAME mhat1156  
EXPNO 2  
PROCNO 1

F2 - Acquisition Parameters  
Date\_ 20120508  
Time 14.15  
INSTRUM spect  
PROBHD 5 mm TBO-BB-1H  
PULPROG zg  
TD 65536  
SOLVENT D2O  
NS 4  
DS 4  
SWH 892.806 Hz  
FIDRES 0.137219 Hz  
AQ 3.6438017 sec  
RG 322.5  
DW 55.600 usec  
DE 7.00 usec  
TE 298.0 K  
D1 5.0000000 sec  
TD0 1  
SFO1 600.132688 MHz  
NUC1 1H  
PI 5.00 usec  
PLW1 -1.0000000 W

F2 - Processing parameters  
SI 65536  
SF 600.1299483 MHz  
WDW EM  
SSB 0  
LB 0.20 Hz  
GB 0  
PC 0.50

# $^{13}\text{C}$ NMR spectrum of **45**

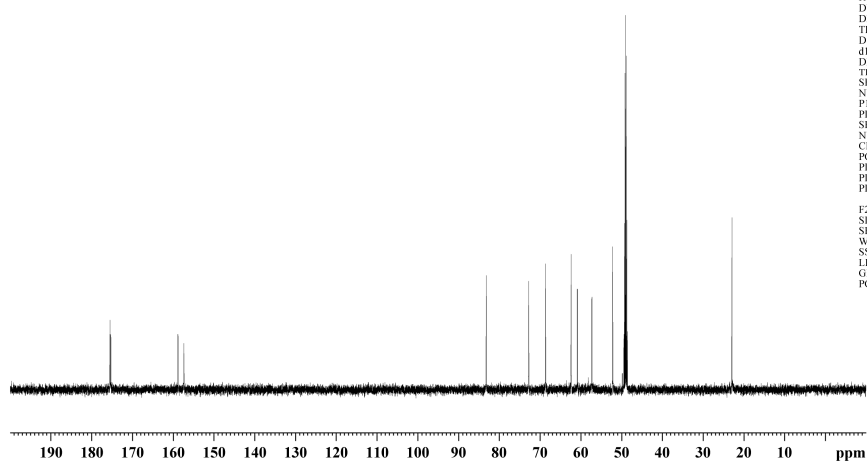

Current Data Parameters  
NAME mhat1156  
EXPNO 3  
PROCNO 1

F2 - Acquisition Parameters  
Date\_ 20120508  
Time 13.05  
INSTRUM spect  
PROBHD 5 mm TBO-BB-1H  
PULPROG zgpg  
TD 65536  
SOLVENT D2O  
NS 4  
DS 4  
SWH 37593.984 Hz  
FIDRES 0.573639 Hz  
AQ 0.8716238 sec  
RG 13004  
DW 13.300 usec  
DE 7.00 usec  
TE 298.0 K  
D1 2.0000000 sec  
d11 0.0300000 sec  
DELTA 1.8999998 sec  
TD0 1  
SFO1 150.9178076 MHz  
NUC1 13C  
PI 3.00 usec  
PLW1 -1.0000000 W  
SFO2 600.1324500 MHz  
NUC2 1H  
CPCPRG12 waltz16  
PCPD2 100.00 usec  
PLW2 -1.0000000 W  
PLW12 -1.0000000 W  
PLW13 -1.0000000 W

F2 - Processing parameters  
SI 65536  
SF 150.9026557 MHz  
WDW EM  
SSB 0  
LB 1.00 Hz  
GB 0  
PC 1.00

# $^1\text{H}$ NMR spectrum of **46**

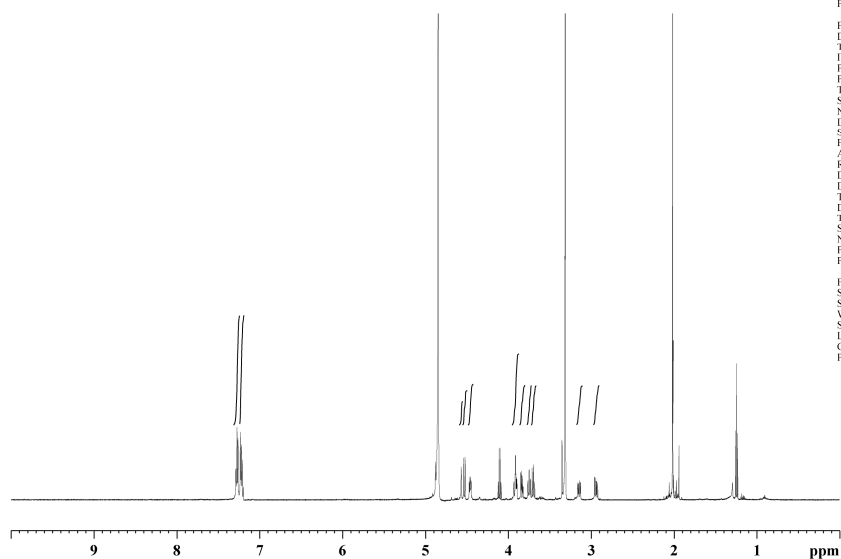

Current Data Parameters  
NAME mlhat-phe-pugnac  
EXPNO 2  
PROCNO 1

F2 - Acquisition Parameters  
Date\_ 20110711  
Time 16.28  
INSTRUM spect  
PROBHD 5 mm TBO-BB-1H  
PULPROG zg  
TD 65536  
SOLVENT MeOD  
NS 64  
DS 4  
SWH 8992.806 Hz  
FIDRES 0.137219 Hz  
AQ 3.6438017 sec  
RG 574.7  
DW 55.600 usec  
DE 7.00 usec  
TE 298.0 K  
D1 5.00000000 sec  
TD0 1  
SFO1 600.132688 MHz  
NUC1 1H  
PI 5.00 usec  
PLW1 -1.00000000 W

F2 - Processing parameters  
SI 65536  
SF 600.1300137 MHz  
WDW no  
SSB 0  
LB 0 Hz  
GB 0  
PC 0.50

# $^{13}\text{C}$ NMR spectrum of **46**

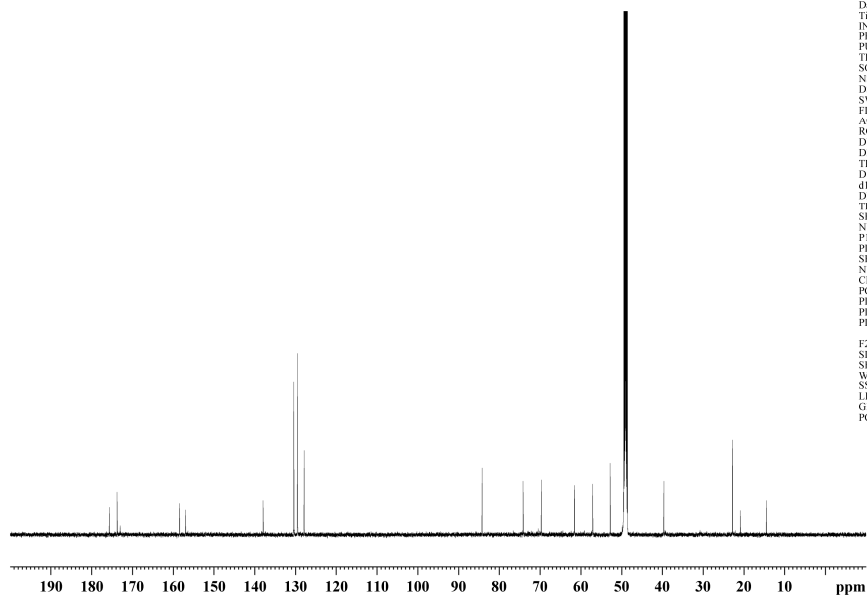

Current Data Parameters  
NAME mlhat-phe-pugnac  
EXPNO 3  
PROCNO 1

F2 - Acquisition Parameters  
Date\_ 20110711  
Time 17.28  
INSTRUM spect  
PROBHD 5 mm TBO-BB-1H  
PULPROG zgpg  
TD 65536  
SOLVENT MeOD  
NS 18000  
DS 4  
SWH 37593.984 Hz  
FIDRES 0.573639 Hz  
AQ 0.8716288 sec  
RG 11588.2  
DW 13.300 usec  
DE 7.00 usec  
TE 298.0 K  
D1 2.00000000 sec  
d11 0.03000000 sec  
DELTA 1.89999998 sec  
TD0 15  
SFO1 150.917801 MHz  
NUC1 13C  
PI 3.00 usec  
PLW1 -1.00000000 W  
SFO2 600.1324500 MHz  
NUC2 1H  
CPCPRG12 waltz16  
PCPD2 100.00 usec  
PLW2 -1.00000000 W  
PLW12 -1.00000000 W  
PLW13 -1.00000000 W

F2 - Processing parameters  
SI 65536  
SF 150.9025971 MHz  
WDW EM  
SSB 0  
LB 1.00 Hz  
GB 0  
PC 1.00

# $^1\text{H}$ NMR spectrum of **47**

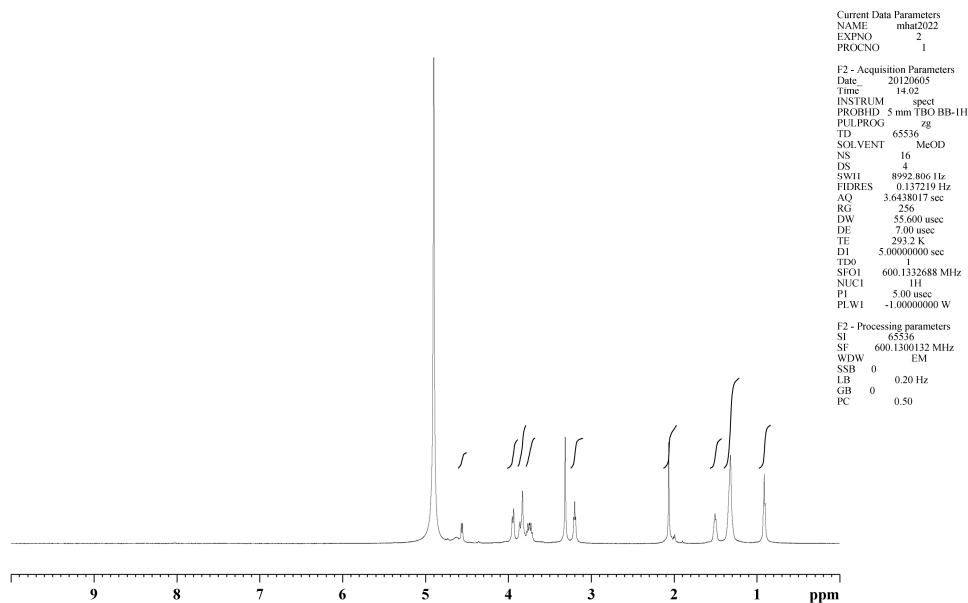

# $^{13}\text{C}$ NMR spectrum of **47**

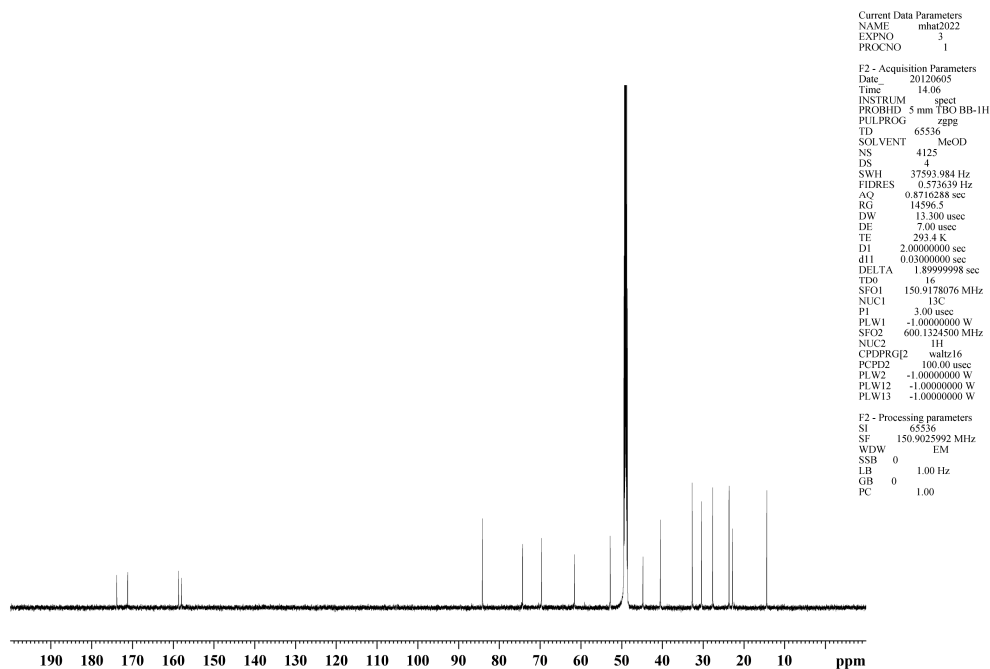

# $^1\text{H}$ NMR spectrum of **49**

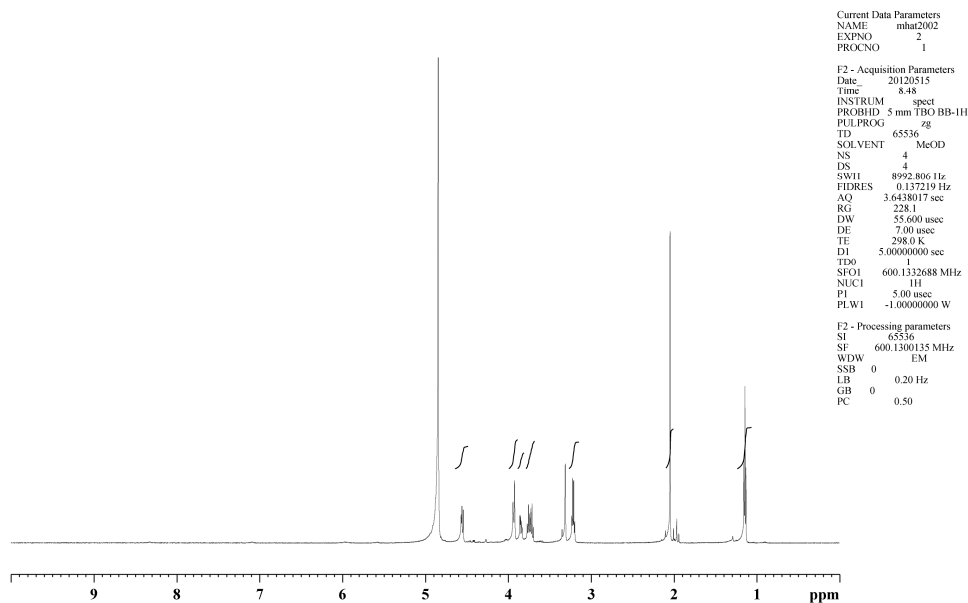

# $^{13}\text{C}$ NMR spectrum of **49**

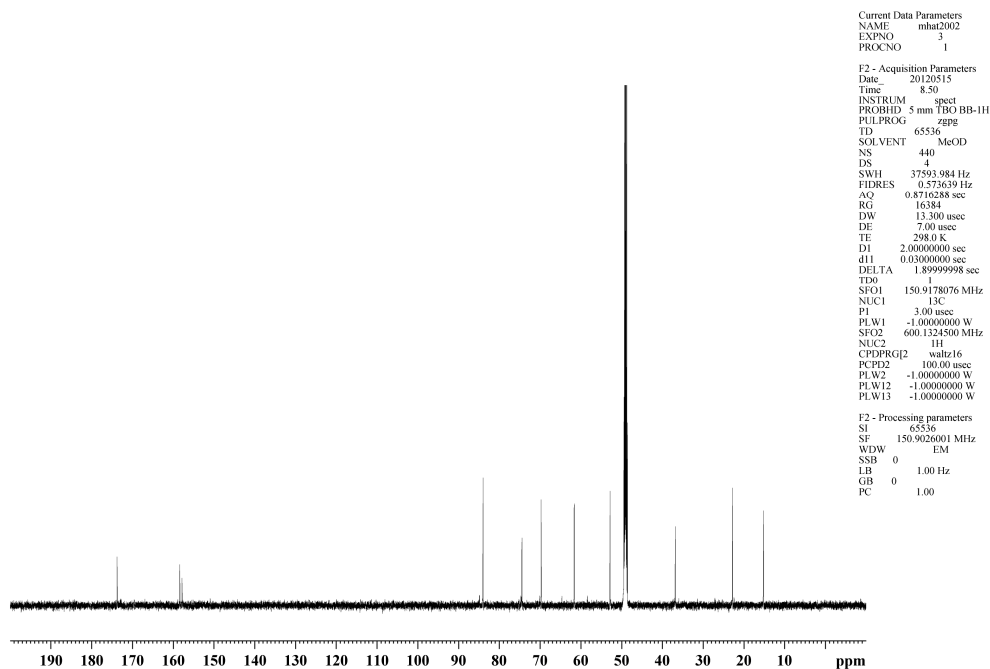

# $^1\text{H}$ NMR spectrum of **50**

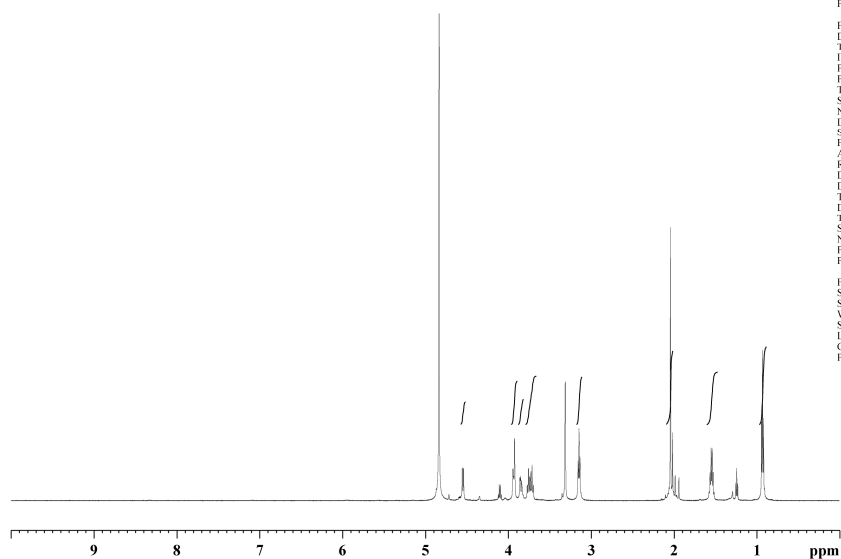

Current Data Parameters  
NAME mlrat-npr-pugnac  
EXPNO 2  
PROCNO 1

F2 - Acquisition Parameters  
Date\_ 20110824  
Time 13.05  
INSTRUM spect  
PROBHD 5 mm TBO-BB-1H  
PULPROG zg  
TD 65536  
SOLVENT MeOD  
NS 16  
DS 4  
SWH 8992.806 Hz  
FIDRES 0.137219 Hz  
AQ 3.6438017 sec  
RG 256  
DW 55.600 usec  
DE 7.00 usec  
TE 298.0 K  
D1 5.00000000 sec  
TD0 1  
SFO1 600.1332688 MHz  
NUC1 1H  
PI 5.00 usec  
PLW1 -1.00000000 W

F2 - Processing parameters  
SI 65536  
SF 600.1300136 MHz  
WDW no  
SSB 0  
LB 0 Hz  
GB 0  
PC 0.50

# $^{13}\text{C}$ NMR spectrum of **50**

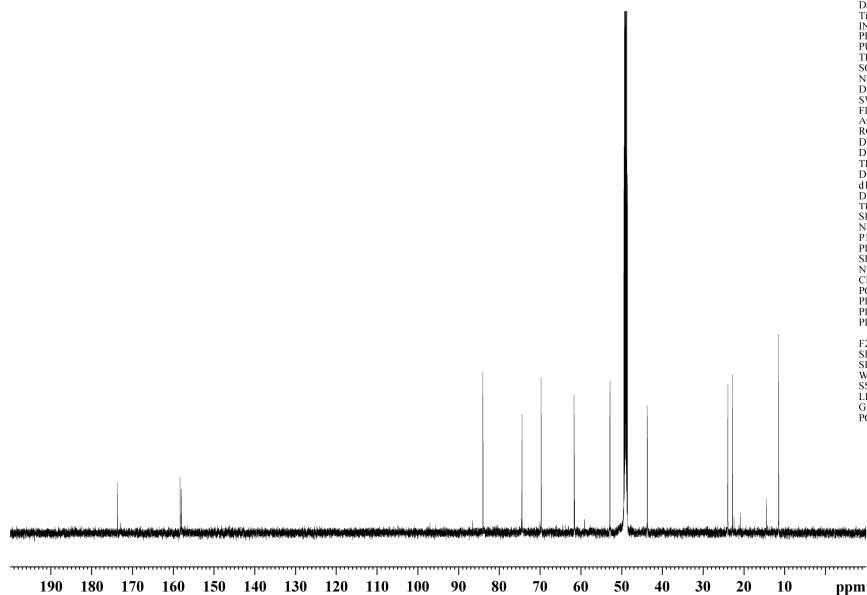

Current Data Parameters  
NAME mlrat-npr-pugnac  
EXPNO 3  
PROCNO 1

F2 - Acquisition Parameters  
Date\_ 20110824  
Time 13.40  
INSTRUM spect  
PROBHD 5 mm TBO-BB-1H  
PULPROG zgpg  
TD 65536  
SOLVENT MeOD  
NS 700  
DS 4  
SWH 37593.984 Hz  
FIDRES 0.573639 Hz  
AQ 0.8716288 sec  
RG 8192  
DW 13.300 usec  
DE 7.00 usec  
TE 298.0 K  
D1 2.00000000 sec  
d11 0.03000000 sec  
DELTA 1.89999998 sec  
TD0 1  
SFO1 150.9178081 MHz  
NUC1 13C  
PI 3.00 usec  
PLW1 -1.00000000 W  
SFO2 600.1324500 MHz  
NUC2 1H  
CPCPRG12 waltz16  
PCPD2 100.00 usec  
PLW2 -1.00000000 W  
PLW12 -1.00000000 W  
PLW13 -1.00000000 W

F2 - Processing parameters  
SI 65536  
SF 150.9025989 MHz  
WDW EM  
SSB 0  
LB 1.00 Hz  
GB 0  
PC 1.00

# $^1\text{H}$ NMR spectrum of **51**

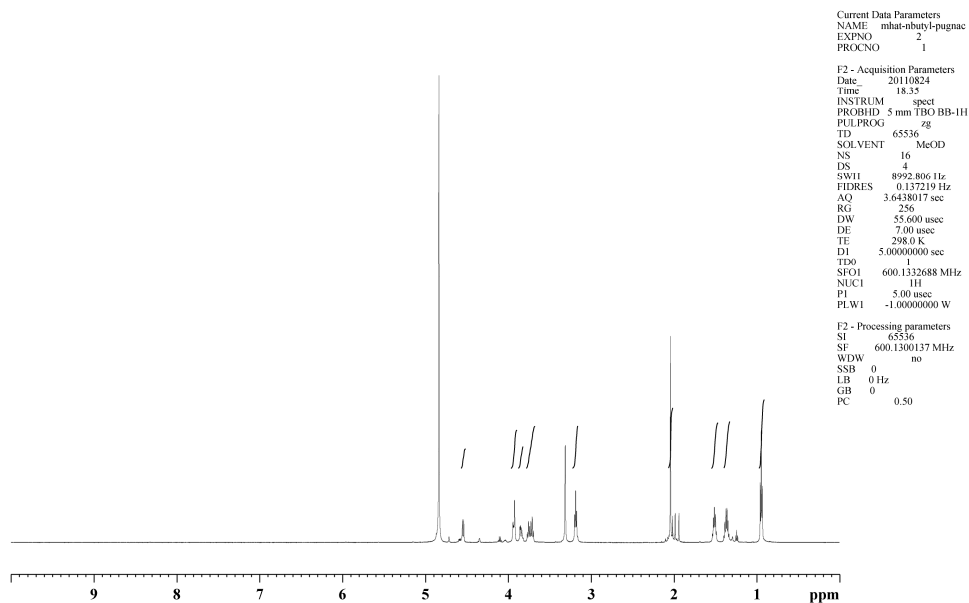

# $^{13}\text{C}$ NMR spectrum of **51**

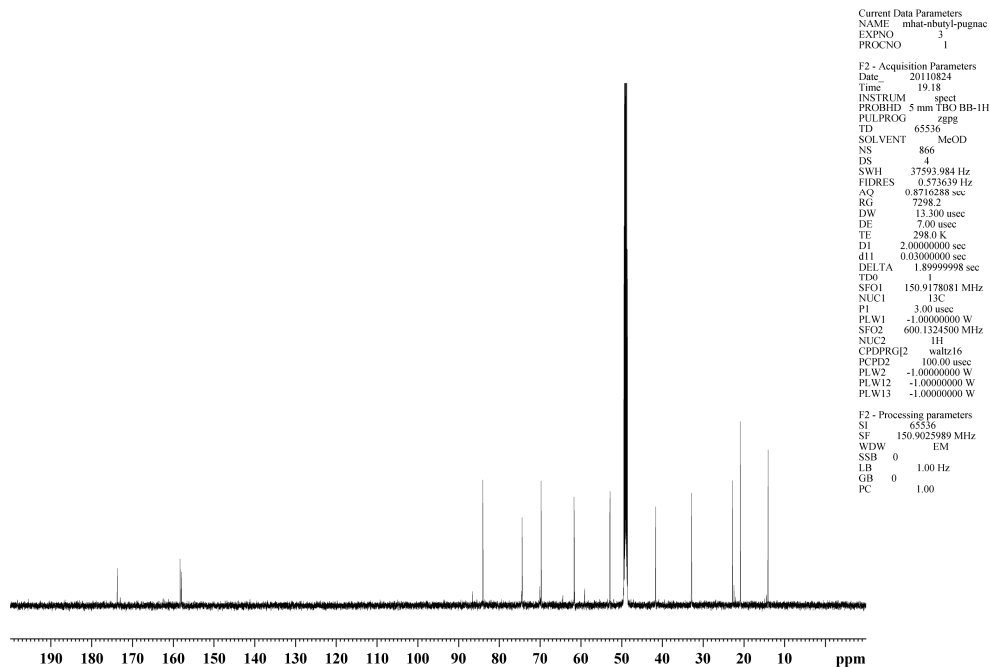



# $^1\text{H}$ NMR spectrum of **52**

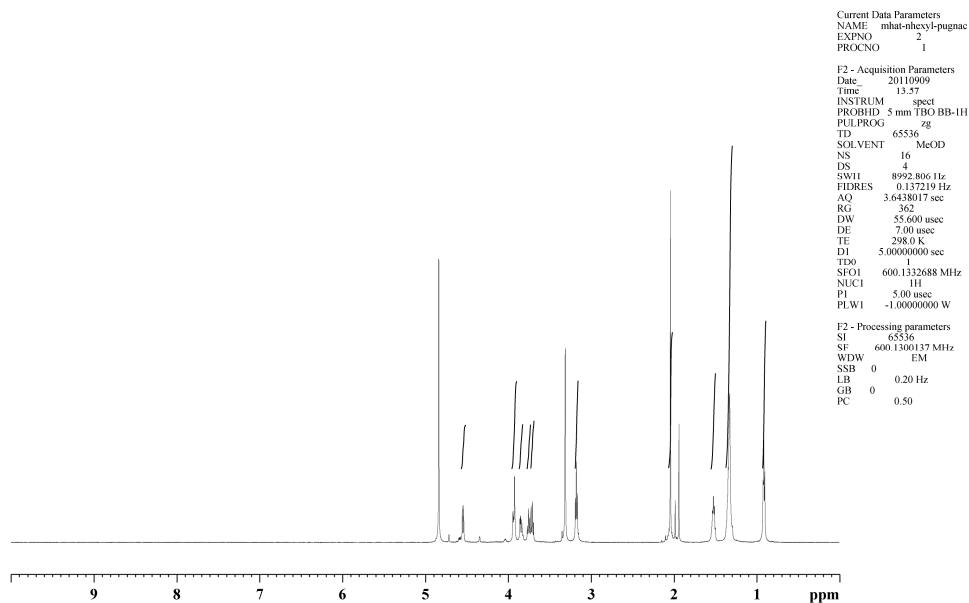

# $^{13}\text{C}$ NMR spectrum of **52**

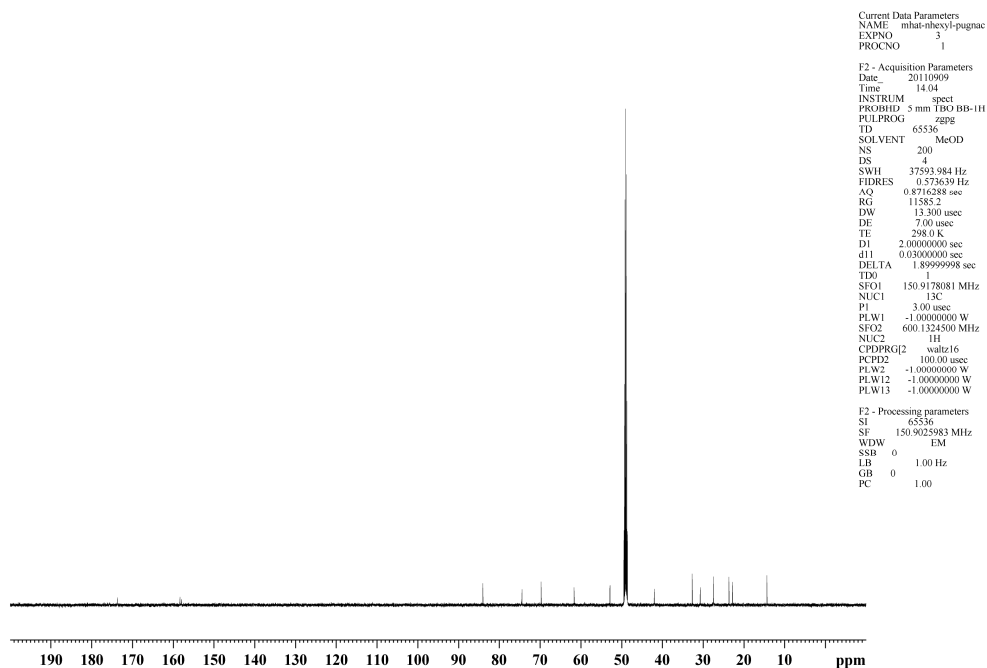

# $^1\text{H}$ NMR spectrum of **53**

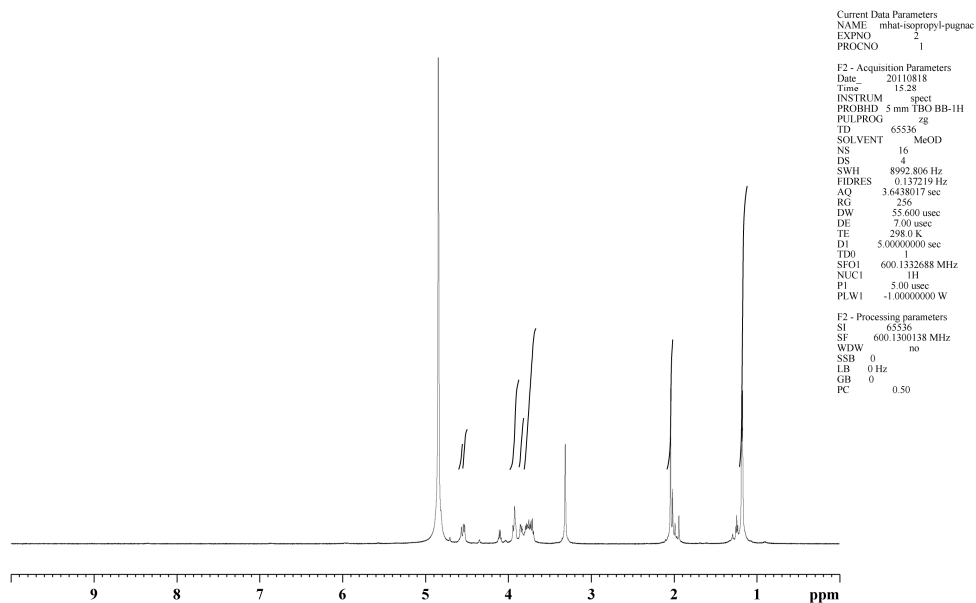

# $^{13}\text{C}$ NMR spectrum of **53**

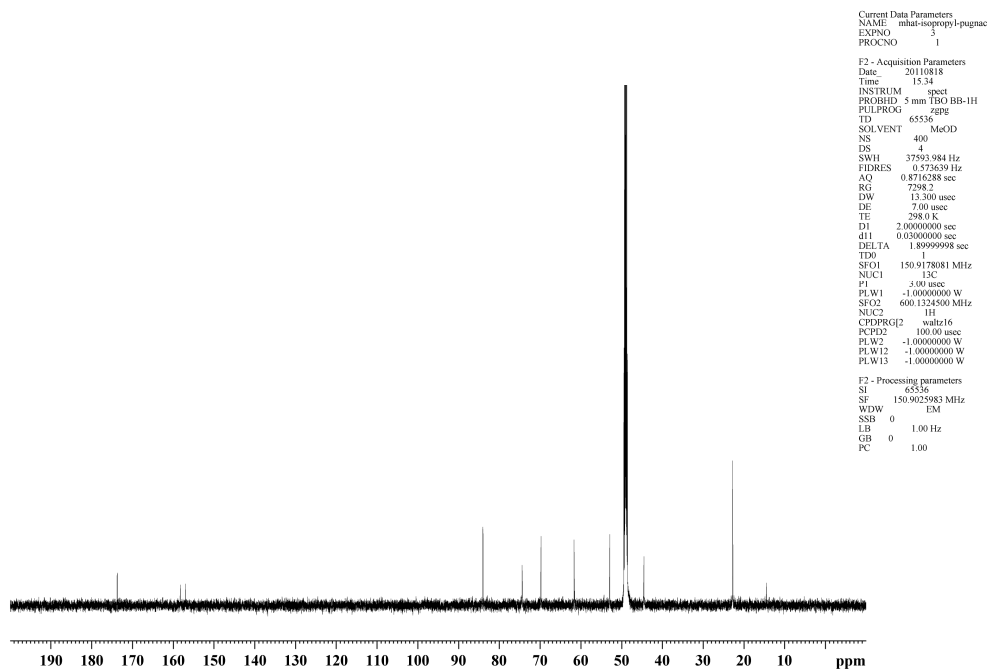

# $^1\text{H}$ NMR spectrum of **54**

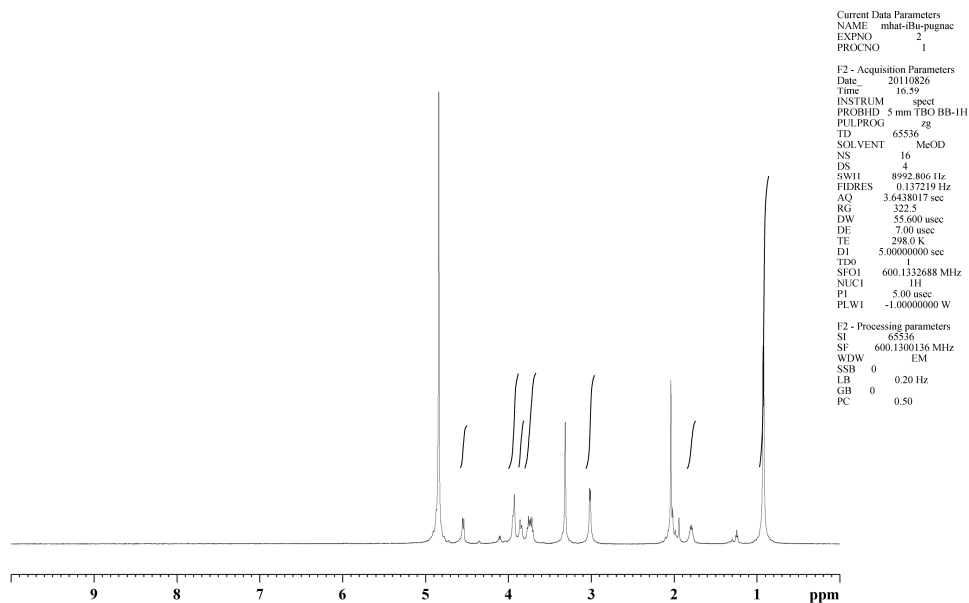

# $^{13}\text{C}$ NMR spectrum of **54**

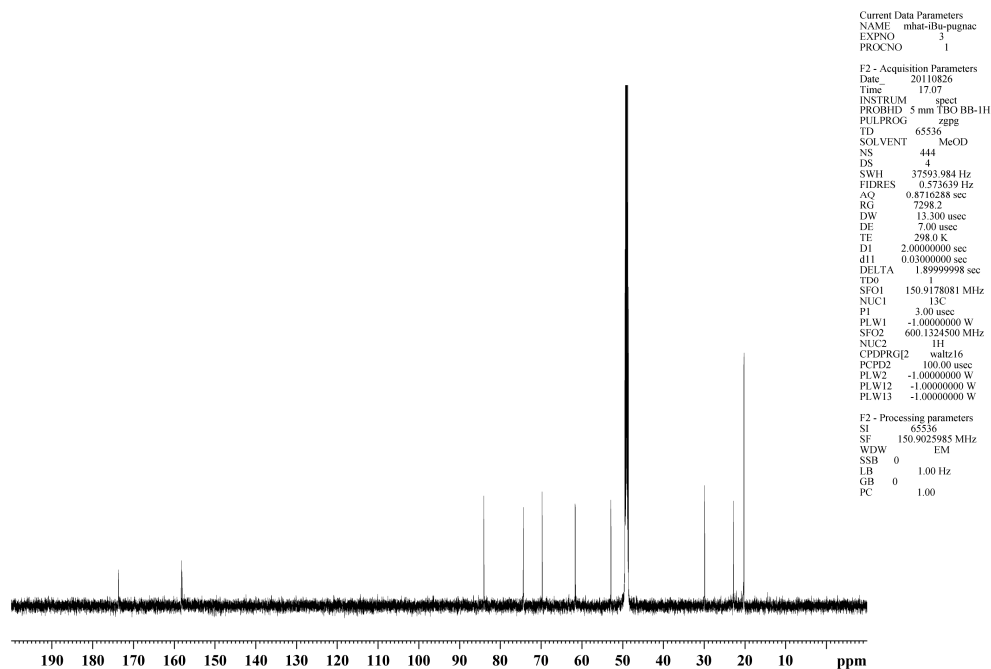

# $^1\text{H}$ NMR spectrum of **55**

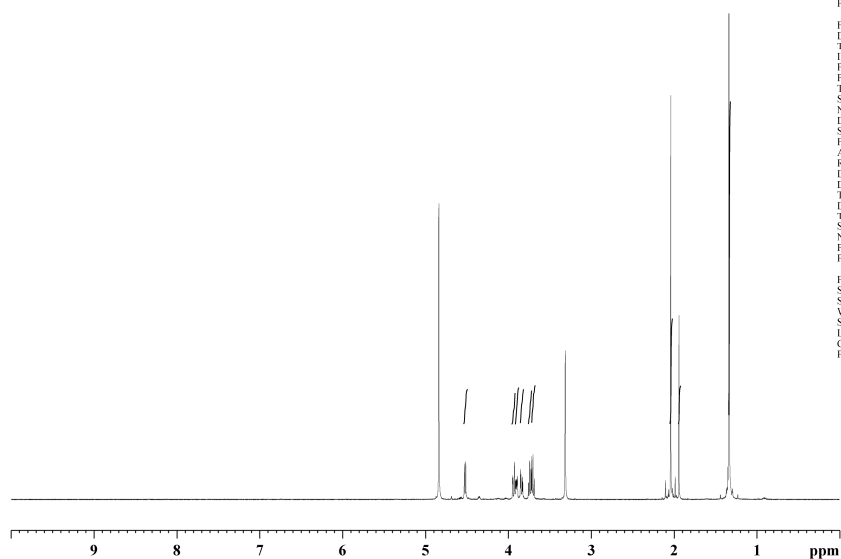

Current Data Parameters  
NAME mhat-tBu-pugnac\_600  
EXPNO 2  
PROCNO 1

F2 - Acquisition Parameters  
Date\_ 20110902  
Time 14.46  
INSTRUM spect  
PROBHD 5 mm TBO-BB-1H  
PULPROG zg  
TD 65536  
SOLVENT MeOD  
NS 8  
DS 4  
SWH 892.806 Hz  
FIDRES 0.137219 Hz  
AQ 3.643017 sec  
RG 362  
DW 55.600 usec  
DE 7.00 usec  
TE 298.0 K  
D1 5.0000000 sec  
TR0  
SFO1 600.132688 MHz  
NUC1 1H  
P1 5.00 usec  
PLW1 -1.0000000 W

F2 - Processing parameters  
SI 65536  
SF 600.1300137 MHz  
WDW no  
SSB 0  
LB 0 Hz  
GB 0  
PC 0.50

# $^{13}\text{C}$ NMR spectrum of **55**

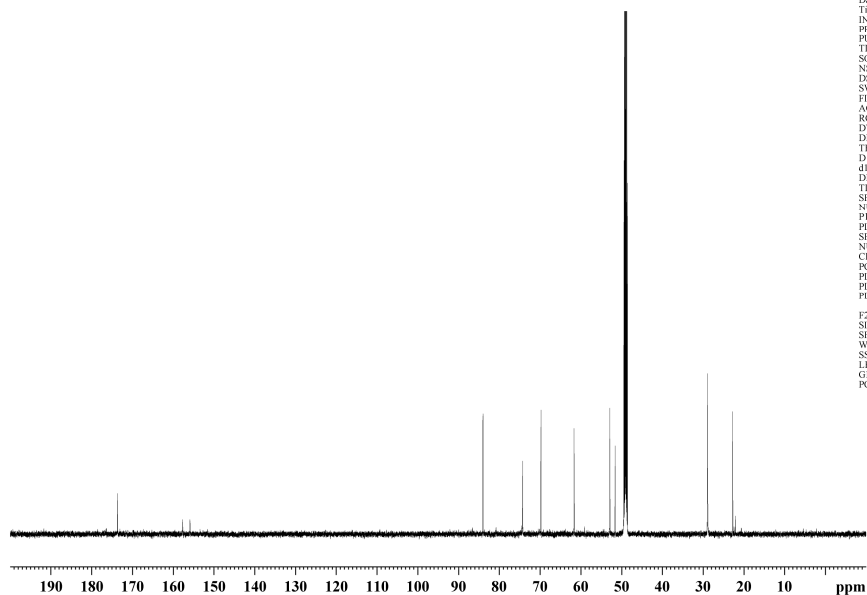

Current Data Parameters  
NAME mhat-tBu-pugnac\_600  
EXPNO 3  
PROCNO 1

F2 - Acquisition Parameters  
Date\_ 20110902  
Time 14.50  
INSTRUM spect  
PROBHD 5 mm TBO-BB-1H  
PULPROG zgpg  
TD 65536  
SOLVENT MeOD  
NS 1000  
DS 4  
SWH 37593.984 Hz  
FIDRES 0.573639 Hz  
AQ 0.8716288 sec  
RG 7298.2  
DW 13.300 usec  
DE 7.00 usec  
TE 298.0 K  
D1 2.0000000 sec  
d11 0.0300000 sec  
DELTA 1.89999998 sec  
TDO 1  
SFO1 150.9178081 MHz  
NUC1 13C  
P1 3.00 usec  
PLW1 -1.0000000 W  
SFO2 600.1324500 MHz  
NUC2 1H  
CPDPRG2 waltz16  
PCPD2 100.00 usec  
PLW2 -1.0000000 W  
PLW12 -1.0000000 W  
PLW13 -1.0000000 W

F2 - Processing parameters  
SI 65536  
SF 150.9025988 MHz  
WDW EM  
SSB 0  
LB 1.00 Hz  
GB 0  
PC 1.00

# $^1\text{H}$ NMR spectrum of **56**

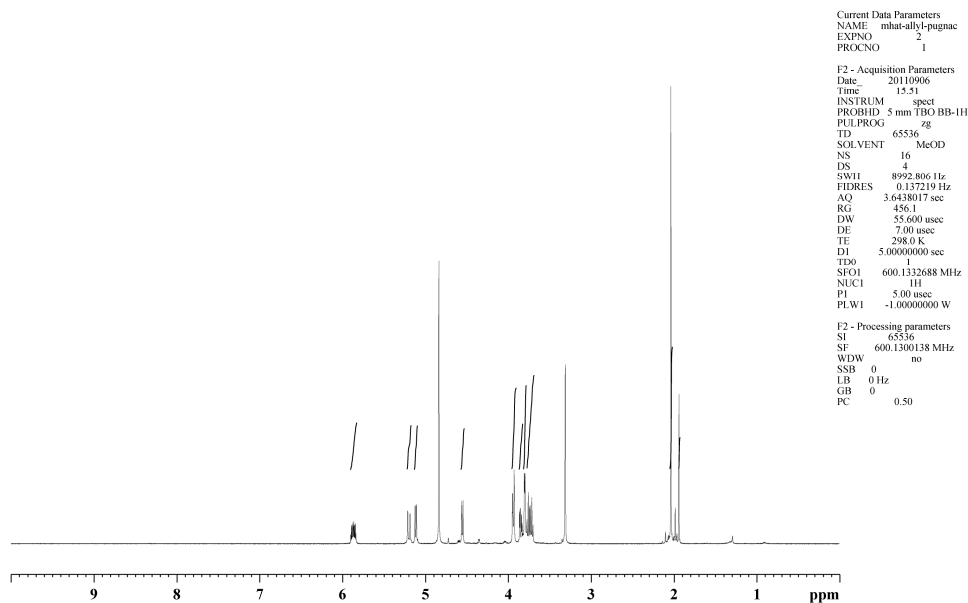

# $^{13}\text{C}$ NMR spectrum of **56**

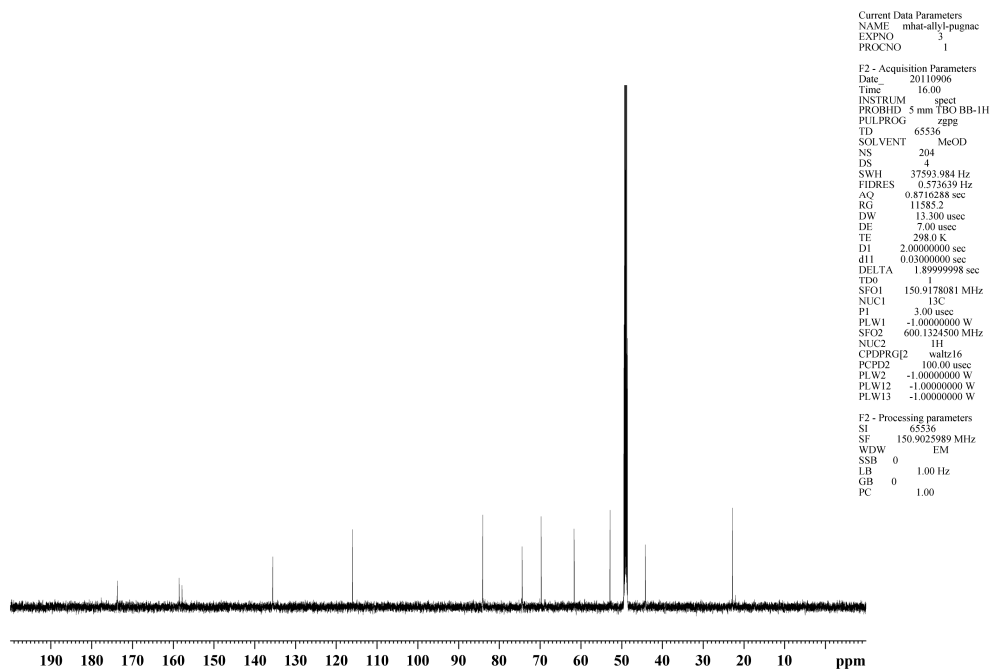

# $^1\text{H}$ NMR spectrum of **57**

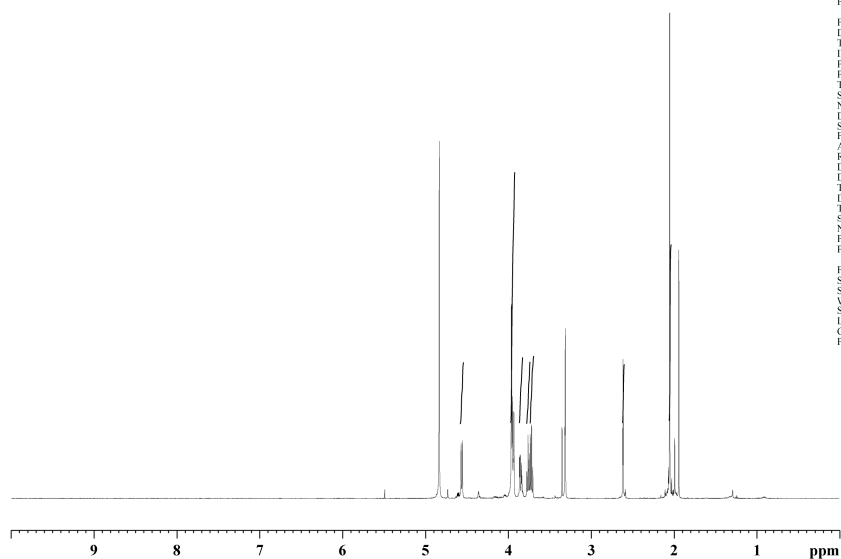

Current Data Parameters  
NAME mhat-propargyl-pugnac  
EXPNO 2  
PROCNO 1

F2 - Acquisition Parameters  
Date\_ 20110830  
Time 13:35  
INSTRUM spect  
PROBHD 5 mm TBO BB-1H  
PULPROG zg  
TD 65536  
SOLVENT MeOD  
NS 16  
DS 4  
SWH 8992.806 Hz  
FIDRES 0.137219 Hz  
AQ 3.6438017 sec  
RG 322.5  
DW 55.600 usec  
DE 7.00 usec  
TE 298.0 K  
D1 5.0000000 sec  
TD0 1  
SFO1 600.132688 MHz  
NUC1 1H  
P1 5.00 usec  
PLW1 -1.00000000 W

F2 - Processing parameters  
SI 65536  
SF 600.1300138 MHz  
WDW EM  
SSB 0  
LB 0.20 Hz  
GB 0  
PC 0.50

# $^{13}\text{C}$ NMR spectrum of **57**

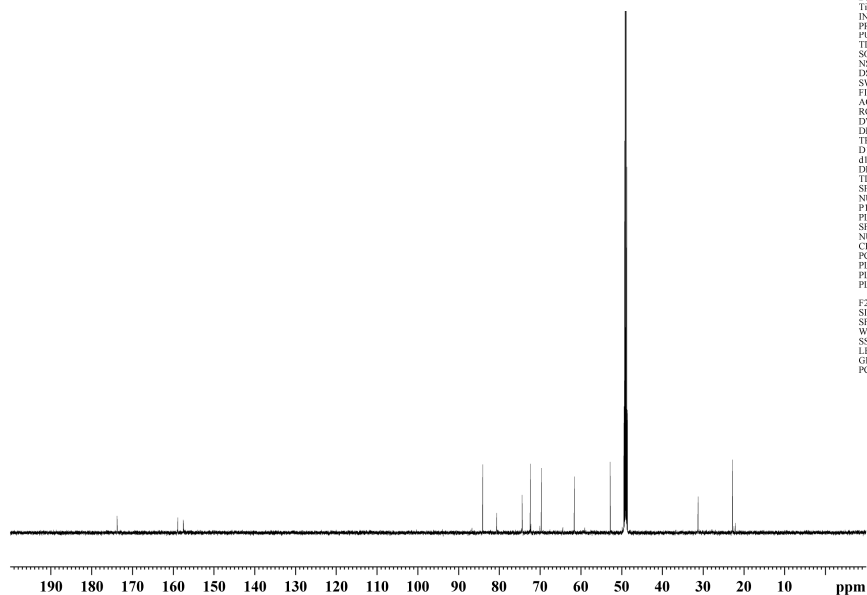

Current Data Parameters  
NAME mhat-propargyl-pugnac  
EXPNO 2  
PROCNO 1

F2 - Acquisition Parameters  
Date\_ 20110830  
Time 13:41  
INSTRUM spect  
PROBHD 5 mm TBO BB-1H  
PULPROG zgpg  
TD 65536  
SOLVENT MeOD  
NS 300  
DS 4  
SWH 37593.984 Hz  
FIDRES 0.573839 Hz  
AQ 0.8716288 sec  
RG 13004  
DW 12.300 usec  
DE 7.00 usec  
TE 298.0 K  
D1 2.0000000 sec  
d11 0.03000000 sec  
DELTA 1.89999998 sec  
TD0 1  
SFO1 150.9178081 MHz  
NUC1 13C  
P1 3.00 usec  
PLW1 -1.00000000 W  
SFO2 600.1324500 MHz  
NUC2 1H  
CPCPRG12 waltz16  
PCPD2 100.00 usec  
PLW2 -1.00000000 W  
PLW12 -1.00000000 W  
PLW13 -1.00000000 W

F2 - Processing parameters  
SI 65536  
SF 150.9026096 MHz  
WDW EM  
SSB 0  
LB 1.00 Hz  
GB 0  
PC 1.00

# $^1\text{H}$ NMR spectrum of **58**

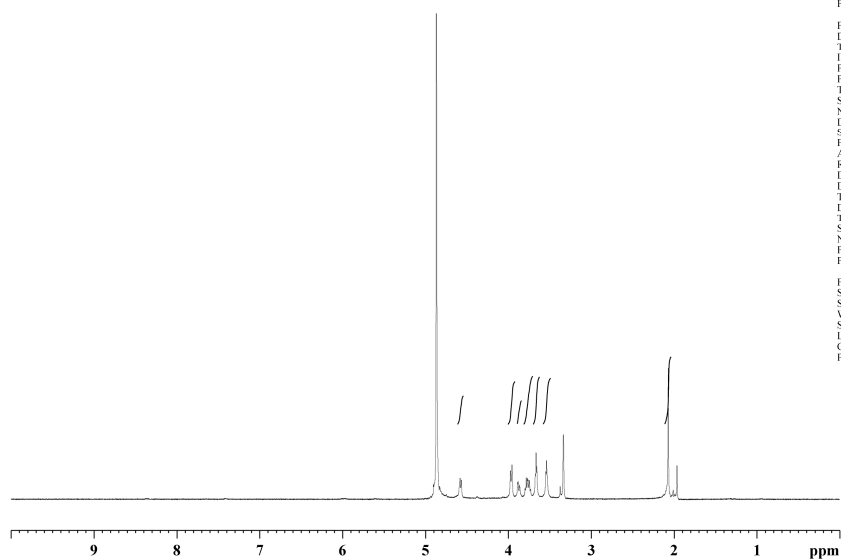

Current Data Parameters  
NAME mhat1134  
EXPNO 1  
PROCNO 1

F2 - Acquisition Parameters  
Date\_ 20120420  
Time 15.33  
INSTRUM spect  
PROBHD 5 mm TBO-BB-1H  
PULPROG zg  
TD 32768  
SOLVENT MeOD  
NS 1  
DS 0  
SWH 892.806 Hz  
FIDRES 0.274439 Hz  
AQ 1.821908 sec  
RG 256  
DW 55.600 usec  
DE 7.00 usec  
TE 298.0 K  
D1 0.50000000 sec  
TD0 1  
SFO1 600.134444 MHz  
NUC1 1H  
PI 5.00 usec  
PLW1 -1.00000000 W

F2 - Processing parameters  
SI 65536  
SF 600.1300000 MHz  
WDW GM  
SSB 0  
LB -0.20 Hz  
GB 0.2  
PC 0.50

# $^{13}\text{C}$ NMR spectrum of **58**

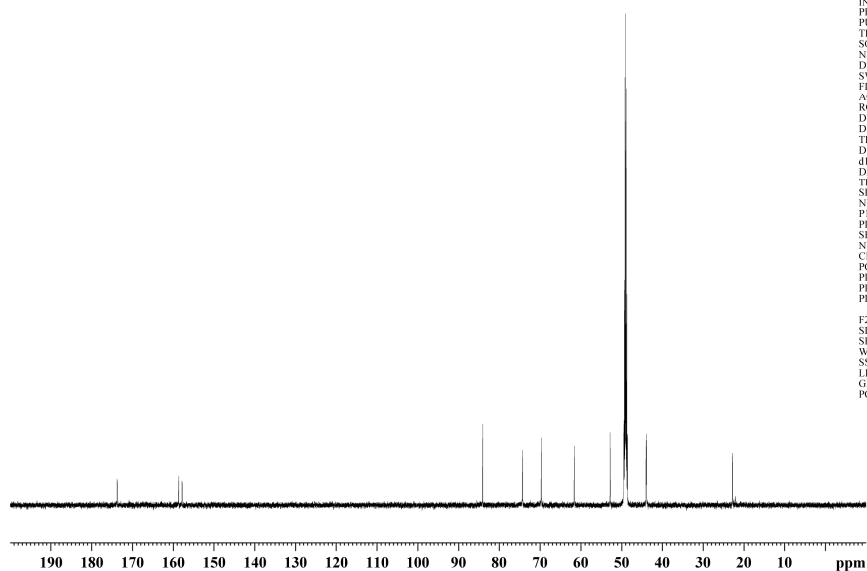

Current Data Parameters  
NAME mhat1134  
EXPNO 3  
PROCNO 1

F2 - Acquisition Parameters  
Date\_ 20120420  
Time 14.57  
INSTRUM spect  
PROBHD 5 mm TBO-BB-1H  
PULPROG zgpg  
TD 65536  
SOLVENT MeOD  
NS 400  
DS 4  
SWH 37593.984 Hz  
FIDRES 0.573639 Hz  
AQ 0.8716288 sec  
RG 7298.2  
DW 13.300 usec  
DE 7.00 usec  
TE 298.0 K  
D1 2.00000000 sec  
d11 0.03000000 sec  
DELTA 1.89999998 sec  
TD0 1  
SFO1 150.9178081 MHz  
NUC1 13C  
PI 3.00 usec  
PLW1 -1.00000000 W  
SFO2 600.1324500 MHz  
NUC2 1H  
CPCPRG12 waltz16  
PCPD2 100.00 usec  
PLW2 -1.00000000 W  
PLW12 -1.00000000 W  
PLW13 -1.00000000 W

F2 - Processing parameters  
SI 65536  
SF 150.9026017 MHz  
WDW EM  
SSB 0  
LB 1.00 Hz  
GB 0  
PC 1.00

# $^1\text{H}$ NMR spectrum of **59**

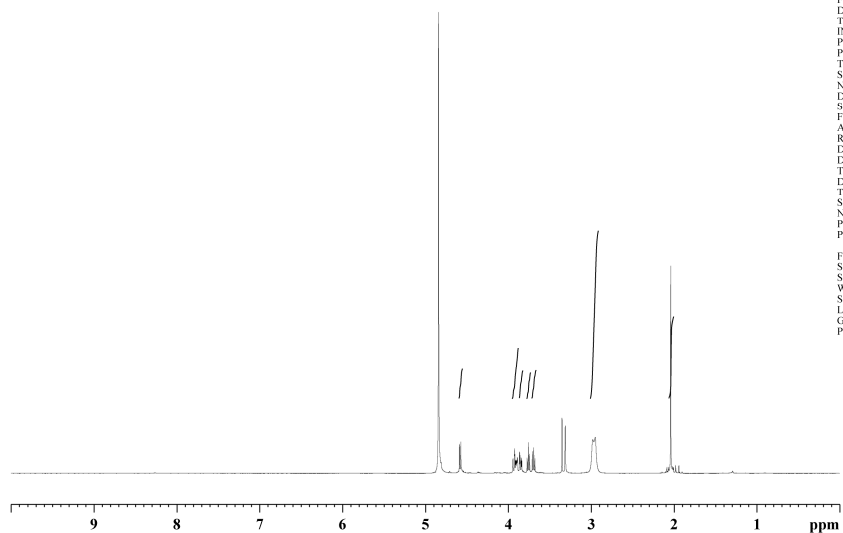

Current Data Parameters  
NAME mhat1098  
EXPNO 2  
PROCNO 1

F2 - Acquisition Parameters  
Date\_ 20120229  
Time 14.46  
INSTRUM spect  
PROBHD 5 mm TBO-BB-1H  
PULPROG zg  
TD 65536  
SOLVENT MeOD  
NS 16  
DS 4  
SWH 892.806 Hz  
FIDRES 0.137219 Hz  
AQ 3.6438017 sec  
RG 228.1  
DW 55.600 usec  
DE 7.00 usec  
TE 298.0 K  
D1 5.0000000 sec  
TD0 1  
SFO1 600.132688 MHz  
NUC1  $^1\text{H}$   
PI 5.00 usec  
PLW1 -1.0000000 W

F2 - Processing parameters  
SI 65536  
SF 600.1300137 MHz  
WDW EM  
SSB 0  
LB 0.20 Hz  
GB 0  
PC 0.50

# $^{13}\text{C}$ NMR spectrum of **59**

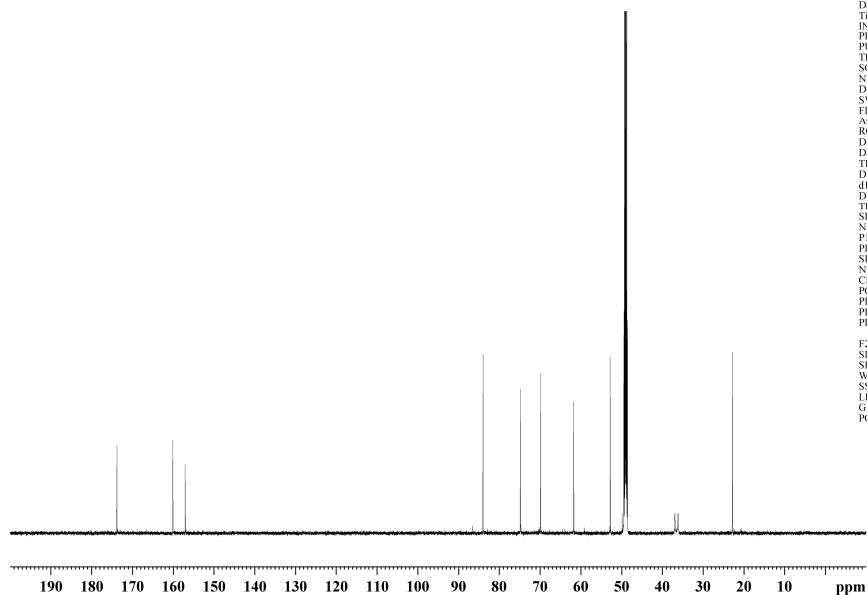

Current Data Parameters  
NAME mhat1098  
EXPNO 3  
PROCNO 1

F2 - Acquisition Parameters  
Date\_ 20120229  
Time 14.51  
INSTRUM spect  
PROBHD 5 mm TBO-BB-1H  
PULPROG zgpg  
TD 65536  
SOLVENT MeOD  
NS 2203  
DS 4  
SWH 37593.984 Hz  
FIDRES 0.573639 Hz  
AQ 0.8716288 sec  
RG 14596.5  
DW 15.300 usec  
DE 7.00 usec  
TE 298.0 K  
D1 2.0000000 sec  
d11 0.0300000 sec  
DELTA 1.8999998 sec  
TD0 2  
SFO1 150.9178081 MHz  
NUC1  $^{13}\text{C}$   
PI 3.00 usec  
PLW1 -1.0000000 W  
SFO2 600.1324500 MHz  
NUC2  $^1\text{H}$   
CDEPRG12 waltz16  
PCPD2 100.00 usec  
PLW2 -1.0000000 W  
PLW12 -1.0000000 W  
PLW13 -1.0000000 W

F2 - Processing parameters  
SI 65536  
SF 150.9026001 MHz  
WDW EM  
SSB 0  
LB 1.00 Hz  
GB 0  
PC 1.00



# $^1\text{H}$ NMR spectrum of **60**

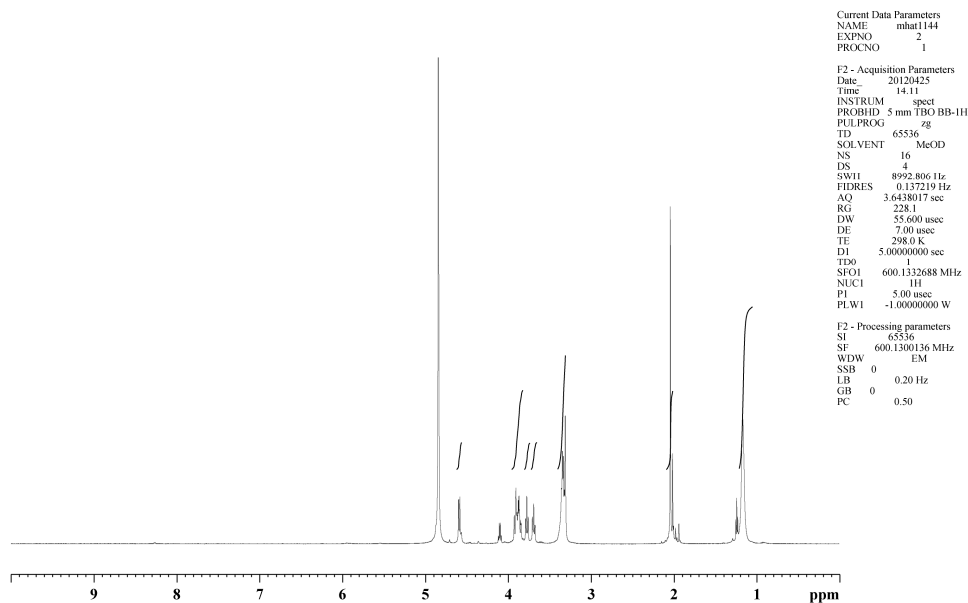

# $^{13}\text{C}$ NMR spectrum of **60**

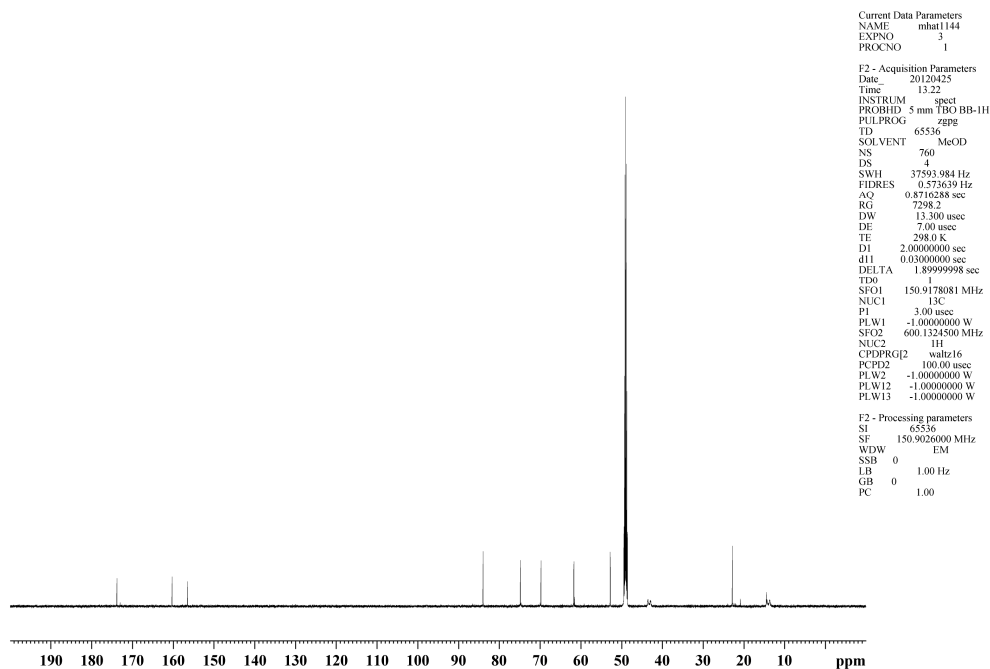

# $^1\text{H}$ NMR spectrum of **61**

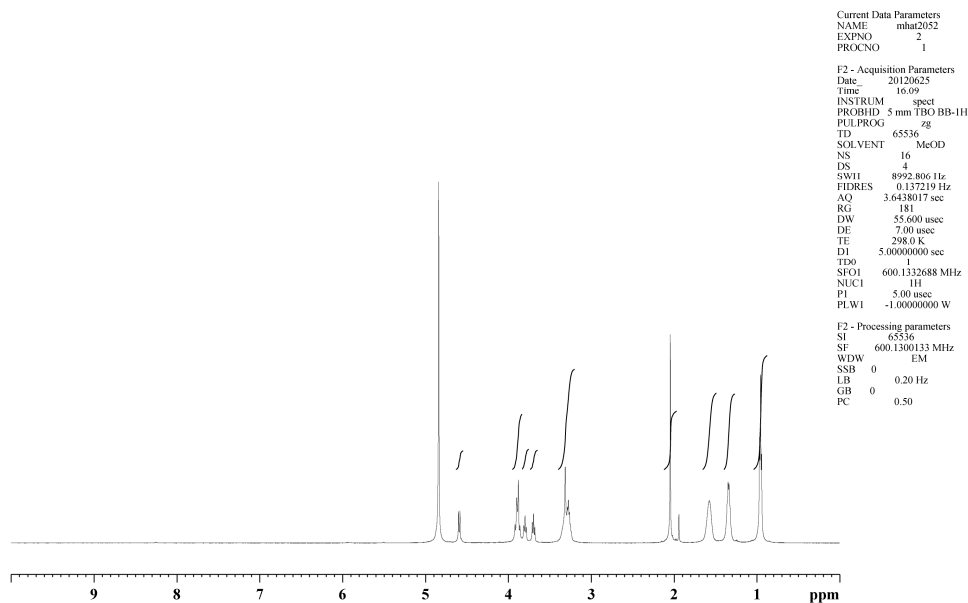

# $^{13}\text{C}$ NMR spectrum of **61**

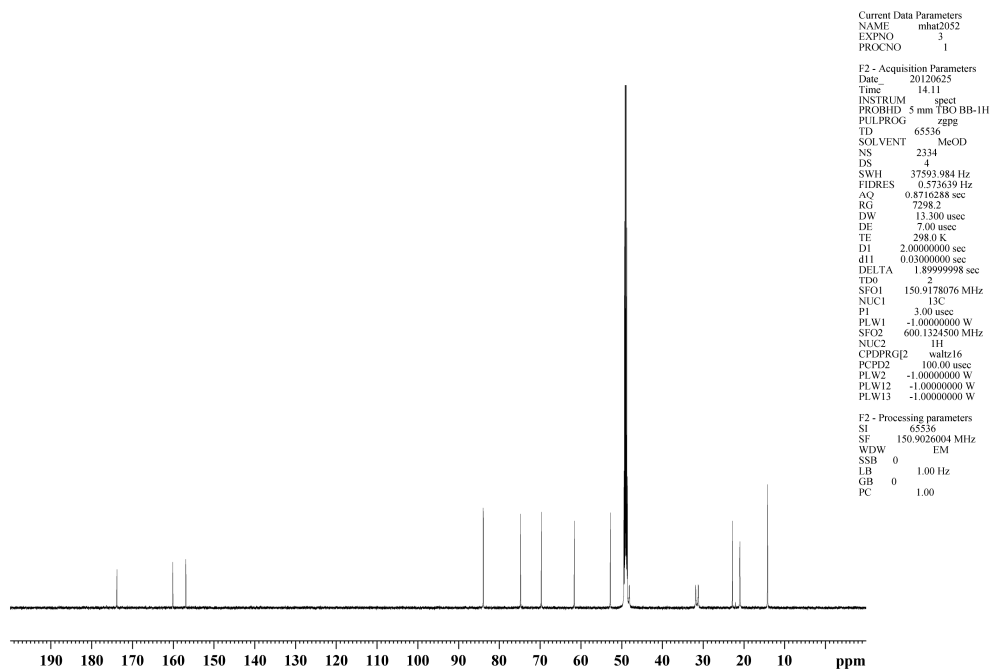

# $^1\text{H}$ NMR spectrum of **62**

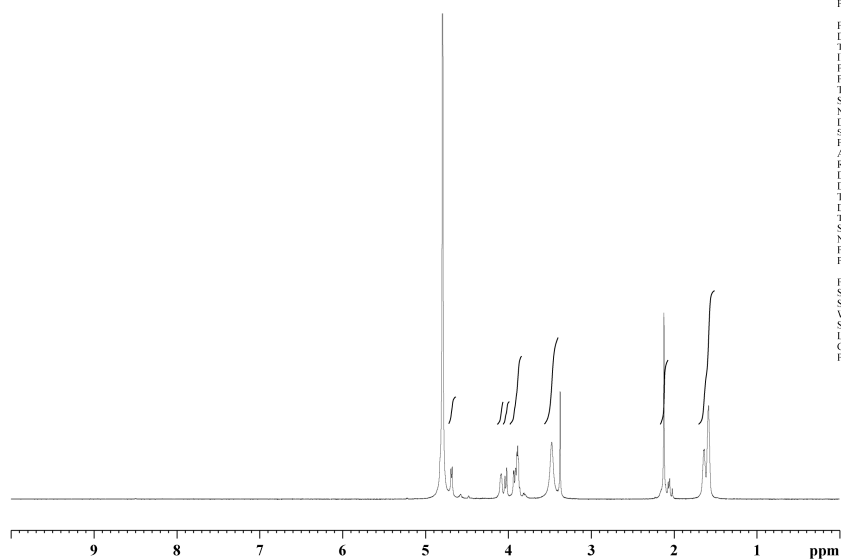

Current Data Parameters  
NAME mhat2016  
EXPNO 2  
PROCNO 1

F2 - Acquisition Parameters  
Date\_ 20120531  
Time 13.43  
INSTRUM spect  
PROBHD 5 mm TBO BB-1H  
PULPROG zg  
TD 65536  
SOLVENT D2O  
NS 4  
DS 4  
SWH 8992.806 Hz  
FIDRES 0.137219 Hz  
AQ 3.6438017 sec  
RG 181  
DW 55.600 usec  
DE 7.00 usec  
TE 298.0 K  
D1 5.00000000 sec  
TD0 1  
SFO1 600.132688 MHz  
NUC1 1H  
PI 5.00 usec  
PLW1 -1.00000000 W

F2 - Processing parameters  
SI 65536  
SF 600.1299475 MHz  
WDW EM  
SSB 0  
LB 0.20 Hz  
GB 0  
PC 0.50

# $^{13}\text{C}$ NMR spectrum of **62**

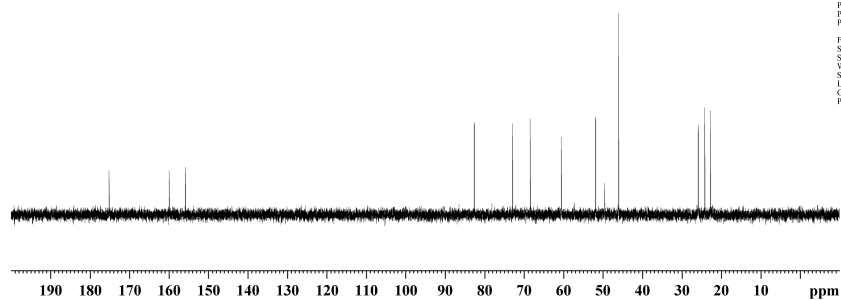

Current Data Parameters  
NAME mhat2016  
EXPNO 2  
PROCNO 1

F2 - Acquisition Parameters  
Date\_ 20120531  
Time 13.46  
INSTRUM spect  
PROBHD 5 mm TBO BB-1H  
PULPROG zgpg  
TD 65536  
SOLVENT D2O  
NS 140  
DS 4  
SWH 37593.984 Hz  
FIDRES 0.573639 Hz  
AQ 0.871628 sec  
RG 16384  
DW 13.300 usec  
DE 7.00 usec  
TE 298.0 K  
D1 2.0000000 sec  
d11 0.0000000 sec  
DELTA 1.89999998 sec  
TD0 1  
SFO1 150.9178076 MHz  
NUC1 13C  
PI 3.00 usec  
PLW1 -1.00000000 W  
SFO2 600.132688 MHz  
NUC2 1H  
CPDPRG12 waltz16  
PCDD2 100.00 usec  
PLW2 -1.00000000 W  
PLW12 -1.00000000 W  
PLW13 -1.00000000 W

F2 - Processing parameters  
SI 65536  
SF 150.9027130 MHz  
WDW EM  
SSB 0  
LB 1.00 Hz  
GB 0  
PC 1.00

# $^1\text{H}$ NMR spectrum of **63**

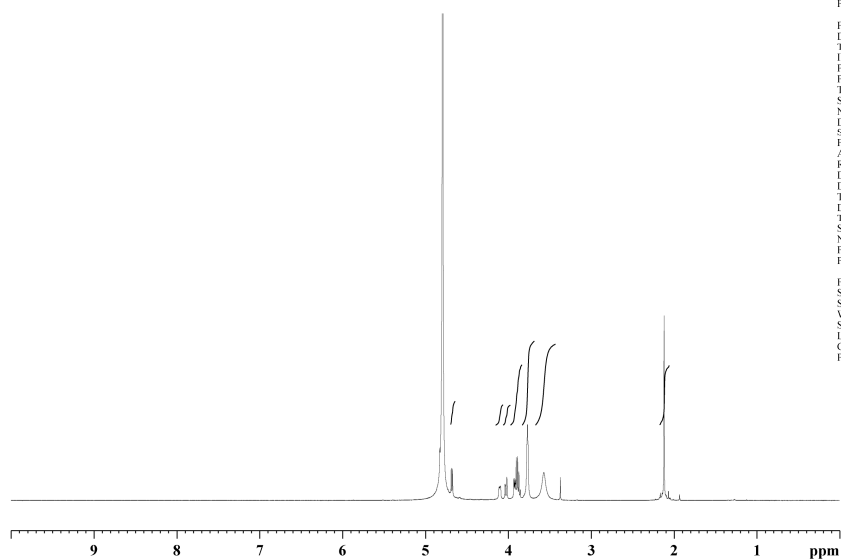

Current Data Parameters  
NAME mhat1102-d2o  
EXPNO 2  
PROCNO 1

F2 - Acquisition Parameters  
Date\_ 20120307  
Time 17.02  
INSTRUM spect  
PROBHD 5 mm TBO-BB-1H  
PULPROG zg  
TD 65536  
SOLVENT D2O  
NS 32  
DS 4  
SWH 892.806 Hz  
FIDRES 0.137219 Hz  
AQ 3.6438017 sec  
RG 362  
DW 55.600 usec  
DE 7.00 usec  
TE 298.0 K  
D1 5.00000000 sec  
TD0 1  
SFO1 600.1332688 MHz  
NUC1 1H  
PI 5.00 usec  
PLW1 -1.00000000 W

F2 - Processing parameters  
SI 65536  
SF 600.1299482 MHz  
WDW EM  
SSB 0  
LB 0.20 Hz  
GB 0  
PC 0.50

# $^{13}\text{C}$ NMR spectrum of **63**

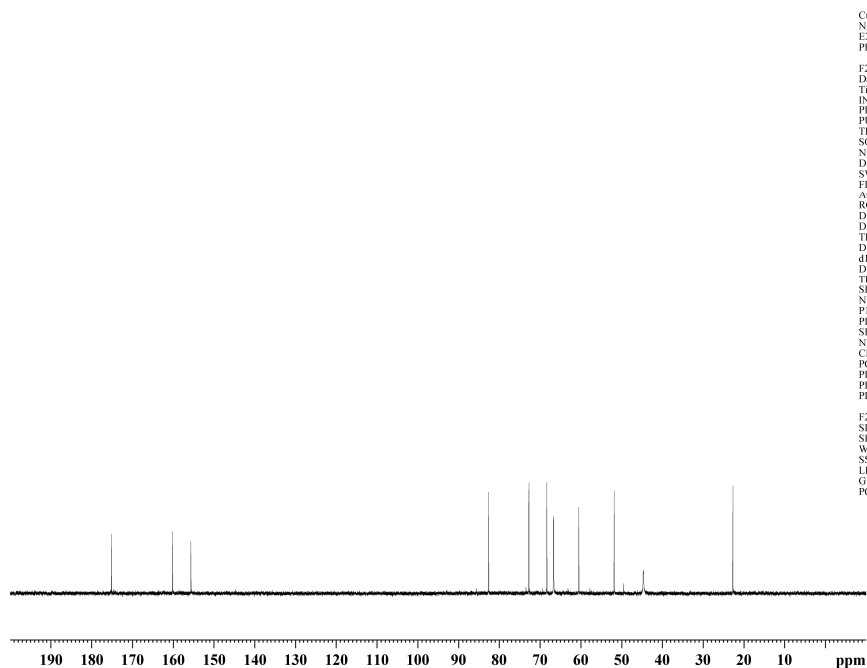

Current Data Parameters  
NAME mhat1102-d2o  
EXPNO 3  
PROCNO 1

F2 - Acquisition Parameters  
Date\_ 20120307  
Time 17.06  
INSTRUM spect  
PROBHD 5 mm TBO-BB-1H  
PULPROG zgpg  
TD 65536  
SOLVENT D2O  
NS 16800  
DS 4  
SWH 37593.984 Hz  
FIDRES 0.573639 Hz  
AQ 0.8710288 sec  
RG 16384  
DW 15.300 usec  
DE 7.00 usec  
TE 298.0 K  
D1 2.00000000 sec  
d11 0.03000000 sec  
DELTA 1.89999998 sec  
TD0 14  
SFO1 150.9178081 MHz  
NUC1 13C  
PI 3.00 usec  
PLW1 -1.00000000 W  
SFO2 600.1324500 MHz  
NUC2 1H  
CDDPRG2 waltz16  
PCPD2 100.00 usec  
PLW2 -1.00000000 W  
PLW12 -1.00000000 W  
PLW13 -1.00000000 W

F2 - Processing parameters  
SI 65536  
SF 150.9027116 MHz  
WDW EM  
SSB 0  
LB 1.00 Hz  
GB 0  
PC 1.00
